# Supplementary material for: Comparative Genomics Supports Ecologically Induced Selection as a Putative Driver of Banded Penguin Diversification
Source: PubMed Central journal article supplement (PMC11371425; doi:10.1093/molbev/msae166), 2024-08-16
Supplement: msae166_supplementary_data.pdf [file msae166_supplementary_data.pdf]

# Supplementary Materials

## **Comparative genomics supports ecologically induced selection as a putative driver of banded penguin diversification**

Fabiola León<sup>1,2,3,4</sup>, Eduardo Pizarro<sup>1,2,3,4</sup>, Daly Noll<sup>1,2,3,4</sup>, Luis R. Pertierra<sup>3</sup>, Patricia Parker<sup>5</sup>,  
Marcela P. A. Espinaze<sup>6</sup>, Guillermo Luna-Jorquera<sup>7,8</sup>, Alejandro Simeone<sup>9</sup>, Esteban Frere<sup>10</sup>,  
Gisele Dantas<sup>11</sup>, Robin Cristofari<sup>12</sup>, Omar E. Cornejo<sup>13</sup>, Rauri C. K. Bowie<sup>14\*</sup>, Juliana A.  
Vianna<sup>1, 2, 3,4\*</sup>

\*Juliana A. Vianna, Pontificia Universidad Católica de Chile, Facultad de Ciencias  
Biológicas, Departamento de Ecosistemas, Instituto para el Desarrollo Sustentable, Av.  
Bernardo O'Higgins 340, Santiago, Chile, phone number: 56-223542730, [jvianna@uc.cl](mailto:jvianna@uc.cl), and  
Rauri C.K. Bowie, Museum of Vertebrate Zoology and Department of Integrative Biology,  
University of California, Berkeley, 3101 Valley Life Science Building, CA 94720-3160,  
USA. [bowie@berkeley.edu](mailto:bowie@berkeley.edu).

## **Supplementary results and discussion**

### **Banded penguin population Structure**

The PCA reveals slight variance explained among sampled colonies, ranging from 6.3% in the Humboldt penguin to 9.7% in the Galapagos penguin (supplementary fig S9A). Although admixture analyses among individuals within species do not align with the PCA results (as shown in  $K = 1$ , supplementary fig S9B), EEMS also detected slight spatial population differentiation among colonies for all species, except for the African penguin (supplementary fig S9C). For the Galápagos penguin EEMS detected reduced migration rates between the GBA breeding colony on Santiago Island and the other two breeding colonies, El Muñeco (GEM) and Caleta Iguana (GCI) located on neighboring Isabela Island (supplementary fig S9C1). For the Humboldt penguin EEMS detected a corridor with effective migration rates significantly higher than the general average along the central and southern Pacific coast, connecting all colonies except the northernmost colony (HPSJ, supplementary fig S9C2). For Magellanic penguins, EEMS identified a signal of restricted gene flow between breeding colonies situated on the Pacific and Atlantic coasts, but with gene flow homogenizing genetic diversity among colonies restricted to the Pacific or Atlantic coasts of South America (supplementary fig S9C3). The Neighbor-Joining tree assigned most of the individuals from a locality to their own monophyletic group (supplementary fig S10). Analyses performed with BayesAss (Mussmann et al. 2019) detected slightly asymmetric bidirectional gene flow between populations (supplementary table S7).

## **Regional niche space comparisons within species**

We found niche differences (D overlap 5%) that are consistent with the observation of two genetic clusters obtained by EEMS for Galápagos penguins (supplementary fig. S22, supplementary table S30-S31). The Santiago population is centered on approximately 1°C warmer temperatures than the Isabela Island populations. Specifically, we observed a thermal overlap of 11%, where 69% of the species' thermal niche space is exclusively comprised by the colonies at Isabella, that is, colder sea water conditions are unfilled by the Santiago cluster. The salinity levels (39%) overlap much more between genetic clusters. Hence, the ecophysiological selective pressure is likely to be driven to a greater extent by differences in thermal conditions rather than salinity between islands.

The two genetic clusters of Humboldt populations along the latitudinal gradient show niche differences consistent with the steep thermal gradient along the coast of South America resulting in less than 6% thermal overlap and an overall niche overlap of 9% (supplementary fig. S23). Thus, limited gene flow between northern and southern populations may in part be explained by different environmental conditions. There is a stronger niche overlap (39%) between the two genetic clusters of Magellanic penguins: temperature (49%), chlorophyll (69% overlap), and salinity (41%) (supplementary fig. S24, supplementary table S30, S31). The large area of Magellanic penguin distribution in the Atlantic and the smaller range in the Pacific could indicate displacement by competition from the Humboldt penguin.

At the intraspecific level, results of the Redundancy Analysis (RDA) reveal that GEM and GCI has a tendency to be positively associated with VELO and CHLO and negatively correlated with GBA in Galápagos penguins (supplementary fig. S26, table S32). These same variables are prone to be positively associated with the HPSJ population and negatively correlated with

HPUNH. Annual Mean Precipitation (BIO12) leans toward positively correlated with the MPUNH population, while ADYI tends to be negatively associated with the Mean Diurnal Range (BIO2) variable, and ASP with BIO1 respectively.

Our results suggest that intraspecific population structure is nearly but not completely panmictic, with a subtle isolation by distance and much of the explainable genetic variation associated with latitudinal separation, which is consistent with previous studies (Dantas et al 2019, Nims et al 2008; Dantas et al 2018). The weak intraspecific structure found among penguin colonies could have evolved over time as a consequence of interactions with environmental factors, where gradients in environmental variables, isolation, and genetic drift play a crucial role in molding the unique traits observed among colonies within each species. Colonies residing in diverse abiotic environments have undergone slight genetic differentiation, apparently, as a result of a combination of factors including isolation by resistance (EEMS), influence of associations with environmental variables (RDA), and thermal niche differentiation.

## Material and Methods

To characterize intra- and inter-specific genetic variability, we estimated genomic diversity using the following estimators:

1) nucleotide diversity ( $\pi$ )

$$\pi = \frac{\sum_{i=1}^{n-1} \sum_{j=i+1}^n dij}{N \times L}$$

where,  $n$  is the number of sequences in the sample,  $dij$  is the number of nucleotide differences between sequence  $iii$  and sequence  $jjj$ ,  $N=2n(n-1)$  is the number of pairwise comparisons and  $L$  is the total number of nucleotide sites compared (Nei 1975);

2) heterozygosity which was computed using the formula in the R package sambaR (de Jong et al 2021).

$$H_{genome} = \frac{\left(\frac{n_H}{n_{ind}} \times n_{snps}\right)}{n_{total}}$$

3) Tajima's  $D$  (Tajima 1989).

$$D = \pi - \theta_{w\text{persite}}$$

## References

- Dantas G, Oliveira L, Santos A, Flores M, Melo D, Simeone A, González-Acuña D, Luna-Jorquera G, Le Bohec C, Valdés-Velasquez A, et al. 2019. Uncovering population structure in the Humboldt penguin (*Spheniscus humboldti*) along the Pacific coast at South America. *PLOS ONE* 14:e0215293.
- Dantas GPM, Cardoso MG, Marasco ACM, Castro LT, Almeida VS, Rodrigues Santos F, Oliveira LR, Crespo E, Frere E, Milliones A, et al. 2018. Demographic history of the Magellanic Penguin (*Spheniscus magellanicus*) on the Pacific and Atlantic coasts of South America. *Journal of ornithology* 159: 643-655.
- de Jong MJ, de Jong JF, Hoelzel AR, Janke A. 2021. SambaR: An R package for fast, easy and reproducible population-genetic analyses of biallelic SNP data sets. *Molecular Ecology Resources* 21:1369–1379.
- Musmann SM, Douglas MR, Chafin TK, Douglas ME. 2019. BA3-SNPs: Contemporary migration reconfigured in BayesAss for next-generation sequence data. *Methods in Ecology and Evolution* 10:1808–1813.

Nei M. 1975. Molecular population genetics and evolution. Molecular population genetics and evolution. [Internet]. Available from: <https://www.cabdirect.org/cabdirect/abstract/19750118335>

Nims BD, Vargas FH, Merkel J. & Parker PG. 2008. Low genetic diversity and lack of population structure in the endangered Galápagos penguin (*Spheniscus mendiculus*). *Conservation Genetics* 9:1413-1420.

Tajima F. 1989. Statistical method for testing the neutral mutation hypothesis by DNA polymorphism. *Genetics* 123:585–595.

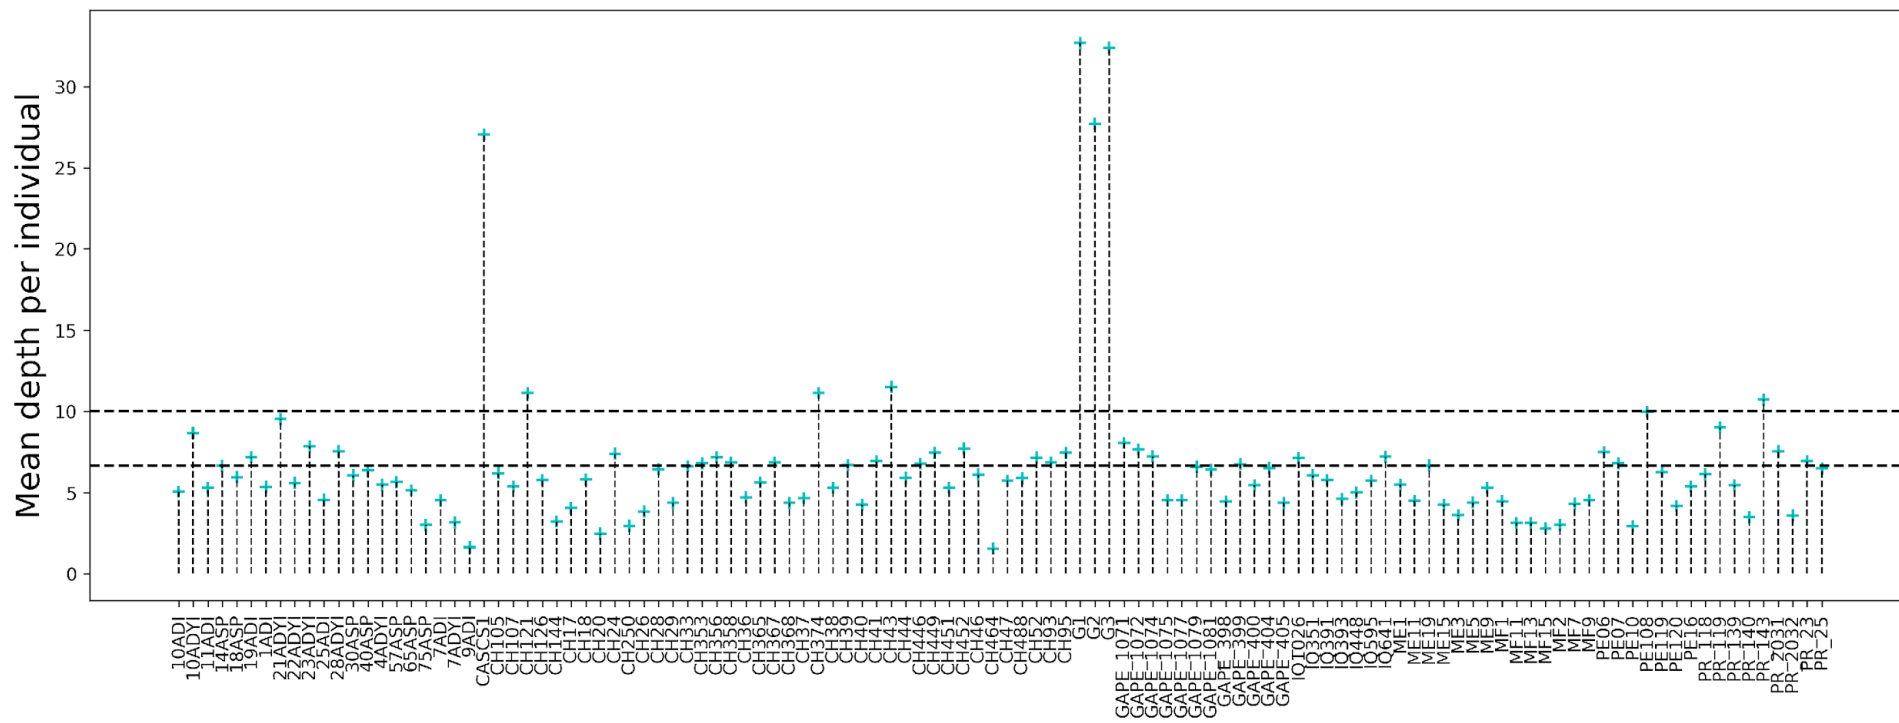

Supplementary Figure 1. Average genomic coverage per individual.

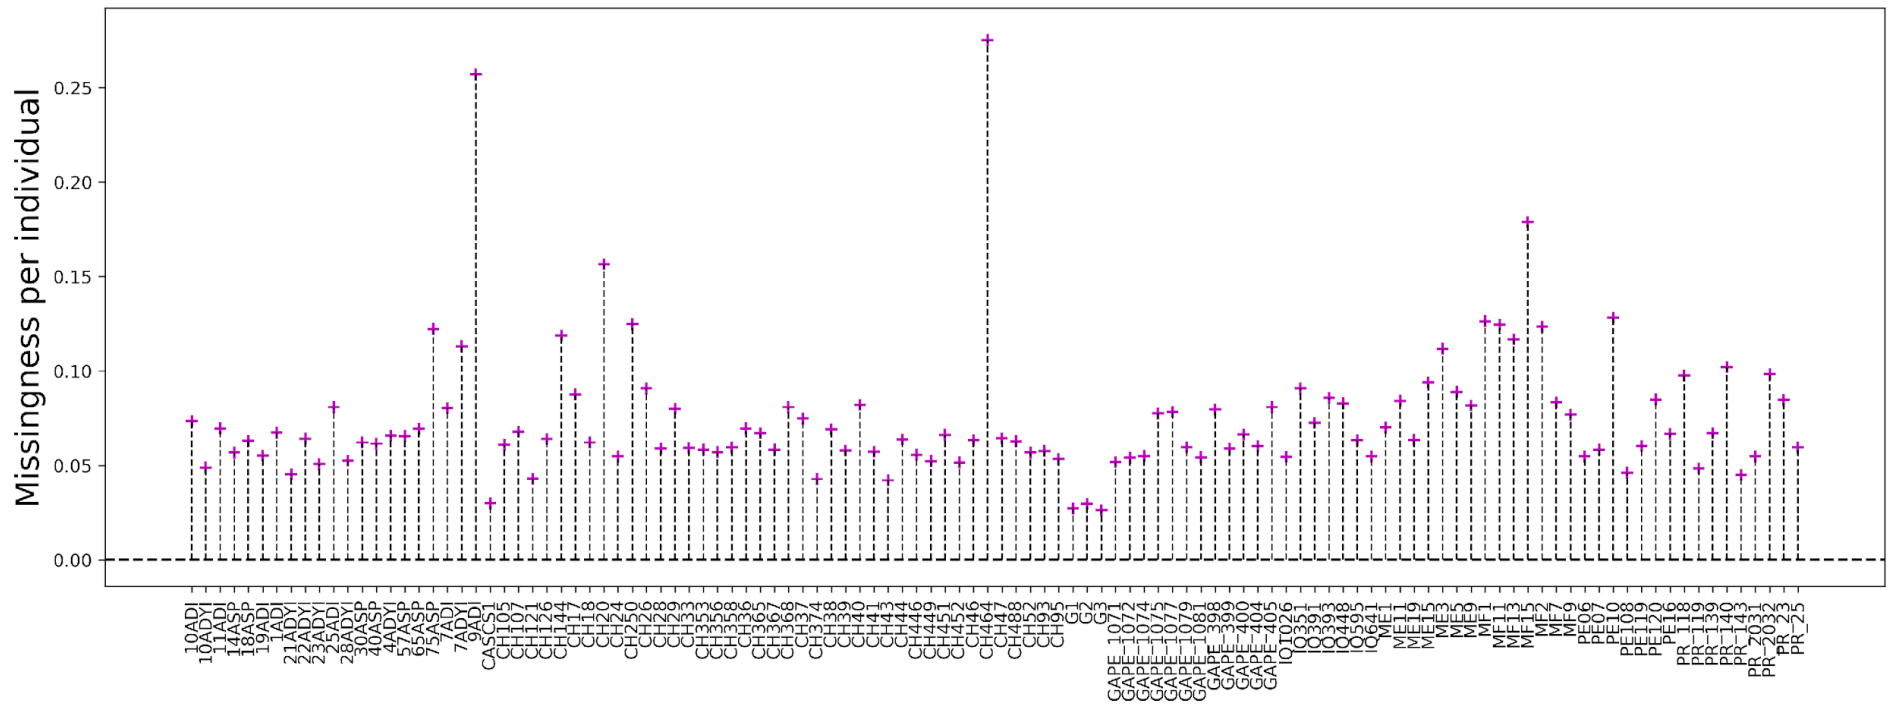



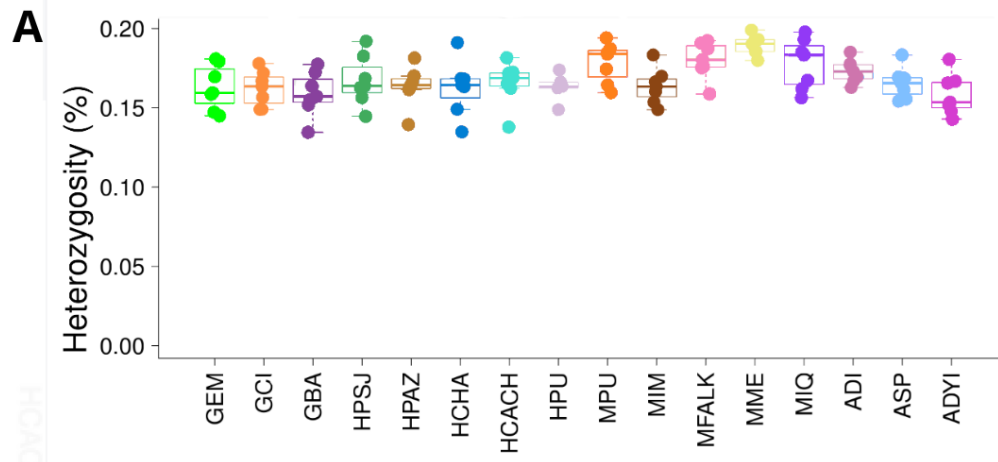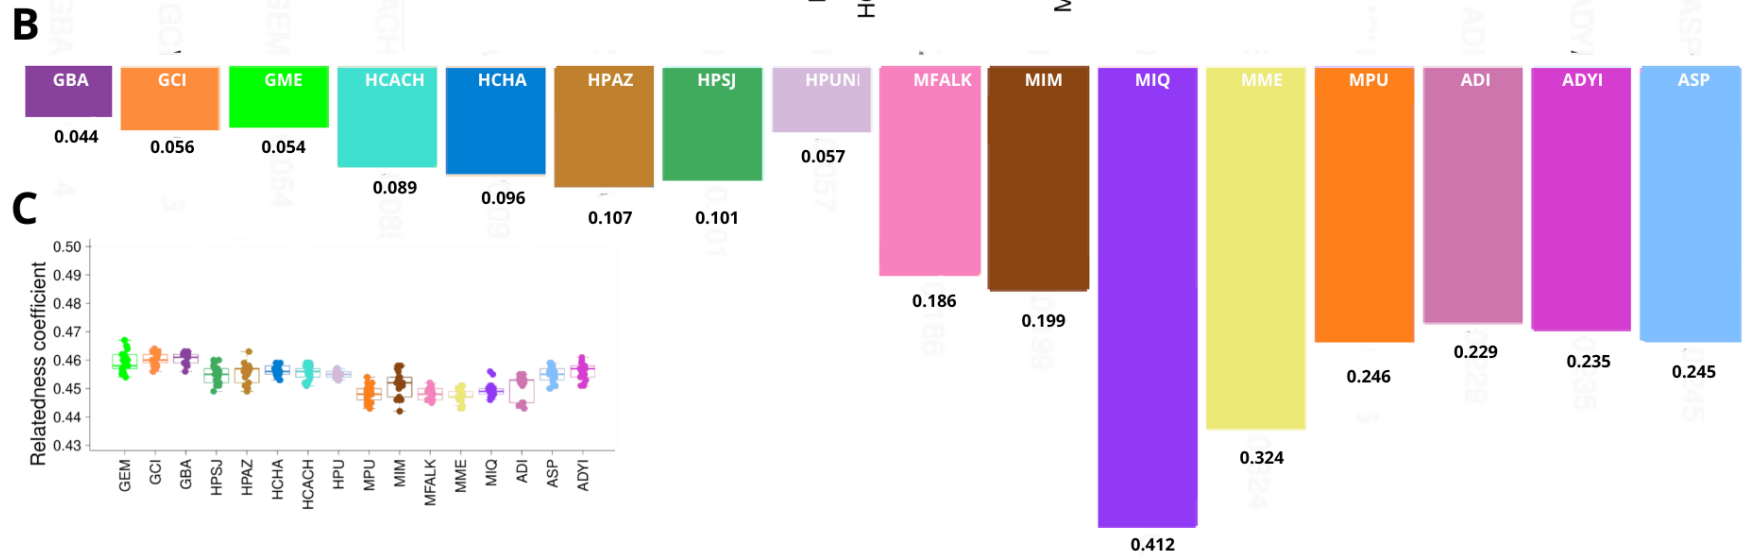

**Supplementary Figure 3. Genetic Diversity of each sampled breeding colony of banded penguin.** Heterozygosity (A), Private alleles (B), and relatedness coefficients (C). From left to right breeding colonies of Galápagos penguin: El Muñeco (GEM), Caleta Iguana (GCI), Bartolomé (GBA); Humboldt penguin: Punta San JUAN (HPSJ), Pan de Azucar (HPAZ), Isla Chañaral (HCHA), Isla Cachagua (HCACH), and Puñihuil (HPU); Magellanic penguin: Puñihuil (MPU), Isla Magdalena (MIM), Malvinas/Falkland Island (MFALK), Monte Entrance (MME), and Isla Quiroga (MIQ); African penguin: Dassen Island (ADI), Stony Point (ASP), Dyer Island (ADYI).

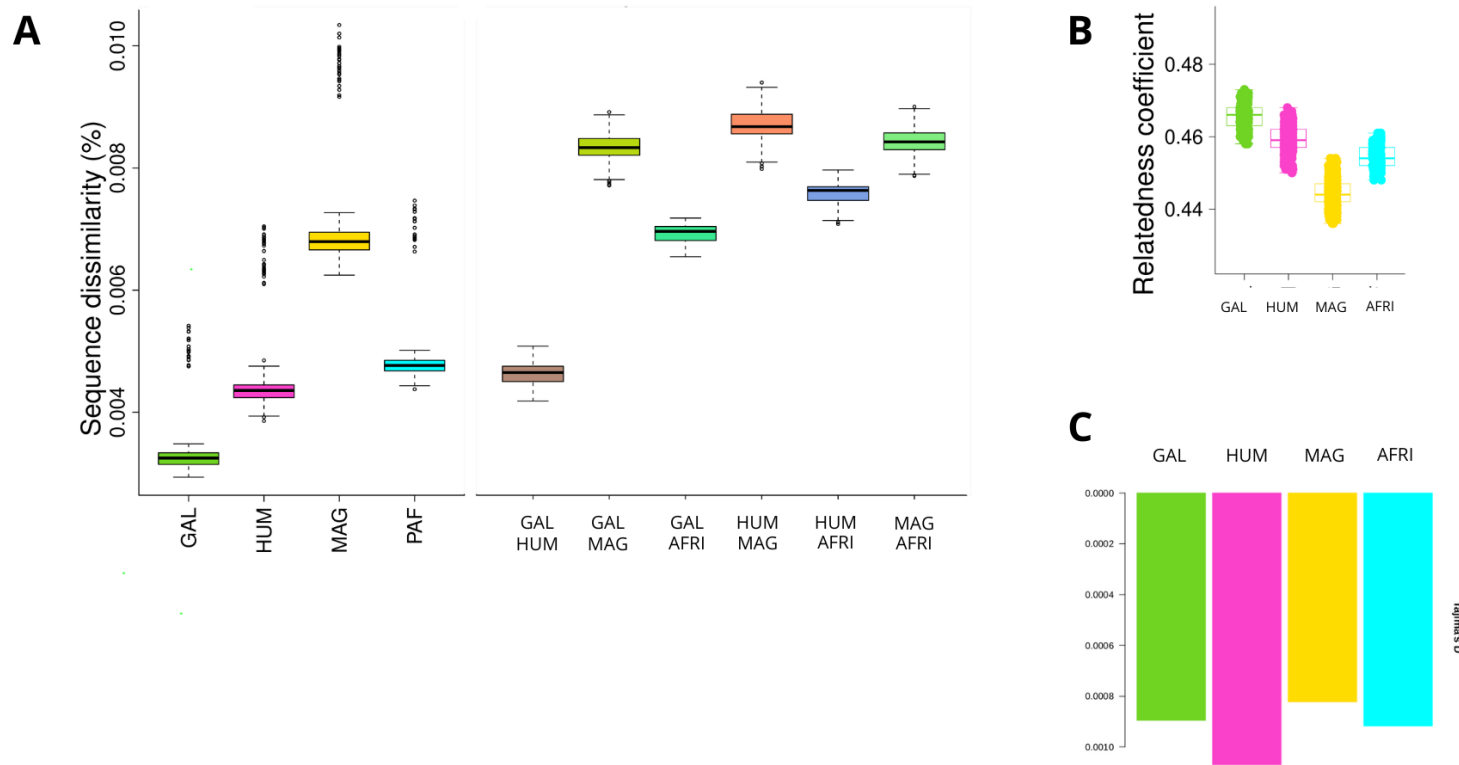

**Supplementary Figure 4. Genome-wide genetic diversity of banded penguins.** Galápagos penguins (GAL), Humboldt penguins (HUM), Magellanic penguin (MAG), and African penguins (AFRI). (A) Within species, and pairwise between comparison between species dissimilarity by species. (B) Relatedness coefficients among species. (C) Tajima's D index among species; positive values indicate a lack of rare alleles.

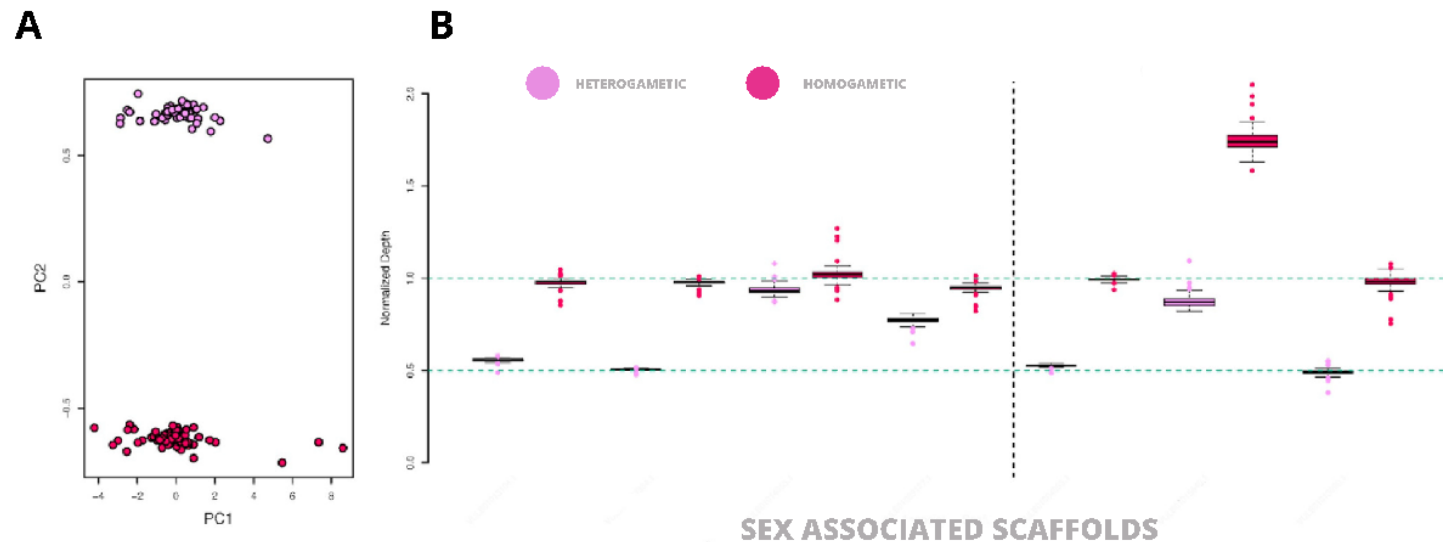

**Supplementary Figure 5. Identification of sex and sex-linked scaffolds.** The colors in the figure represent the SATC-inferred homogametic (dark red) and heterogametic (pink red) sexes. (A) On the left, a Principal Component Analysis (PCA) plot depicting the normalized depth of coverage across all scaffolds and samples. (B) On the right, a boxplot illustrates the normalized depth of coverage for each sex from the identified sex-linked scaffolds. A vertical dashed line delineates between scaffolds that satisfied both the t-test and ratio-

based threshold criteria (i.e., X/Z-linked, to the left of the line) and those that solely met the t-test criterion (i.e., abnormal depth ratios, to the right of the line).

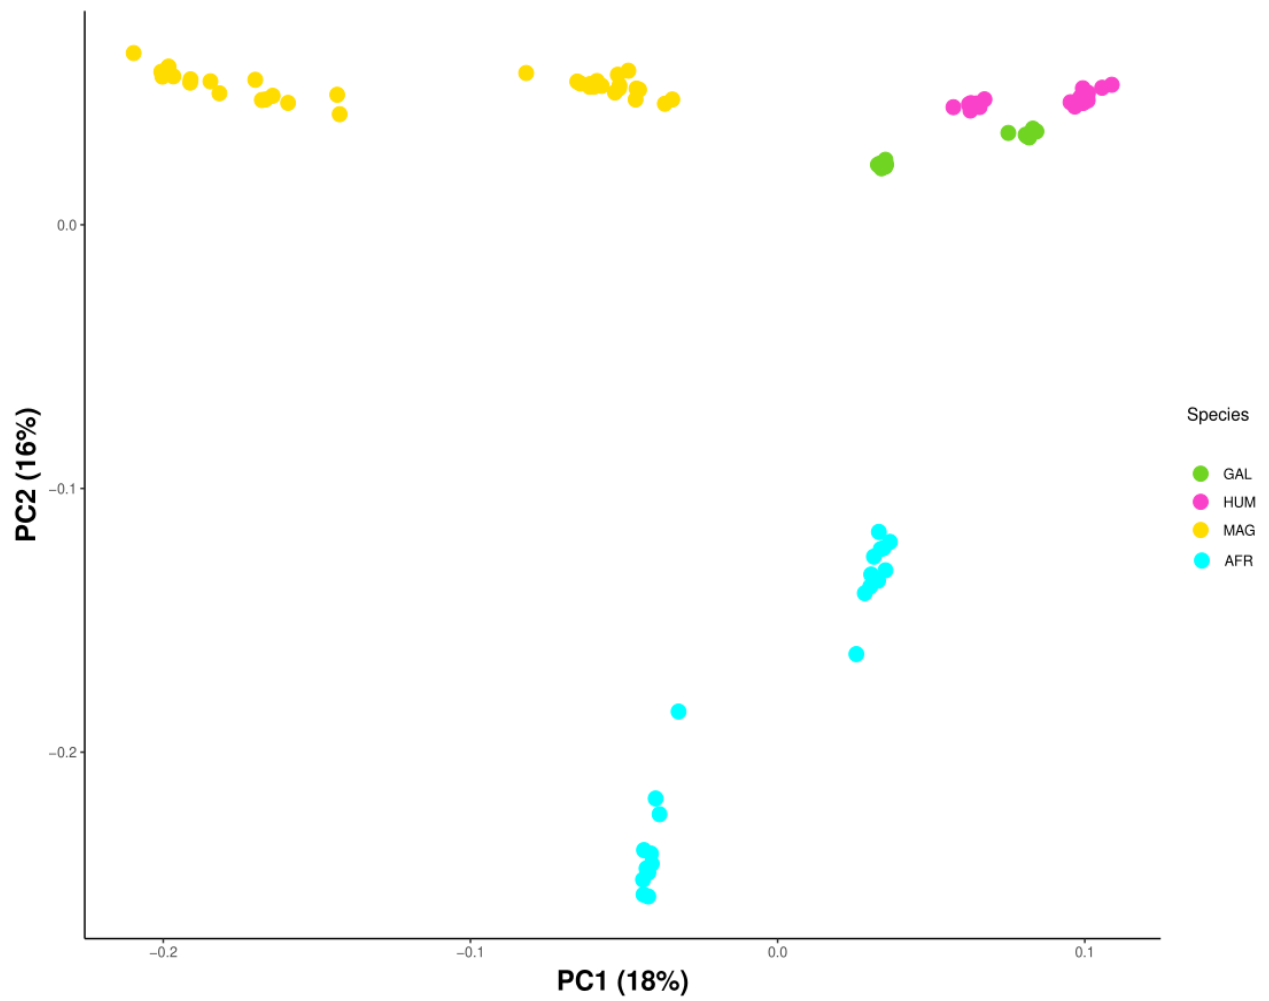

**Supplementary Figure 6. Principal Component Analysis of sex-linked scaffolds.** SNPs from Galápagos and Humboldt penguins cluster closer to each than to Magellanic and African penguins.

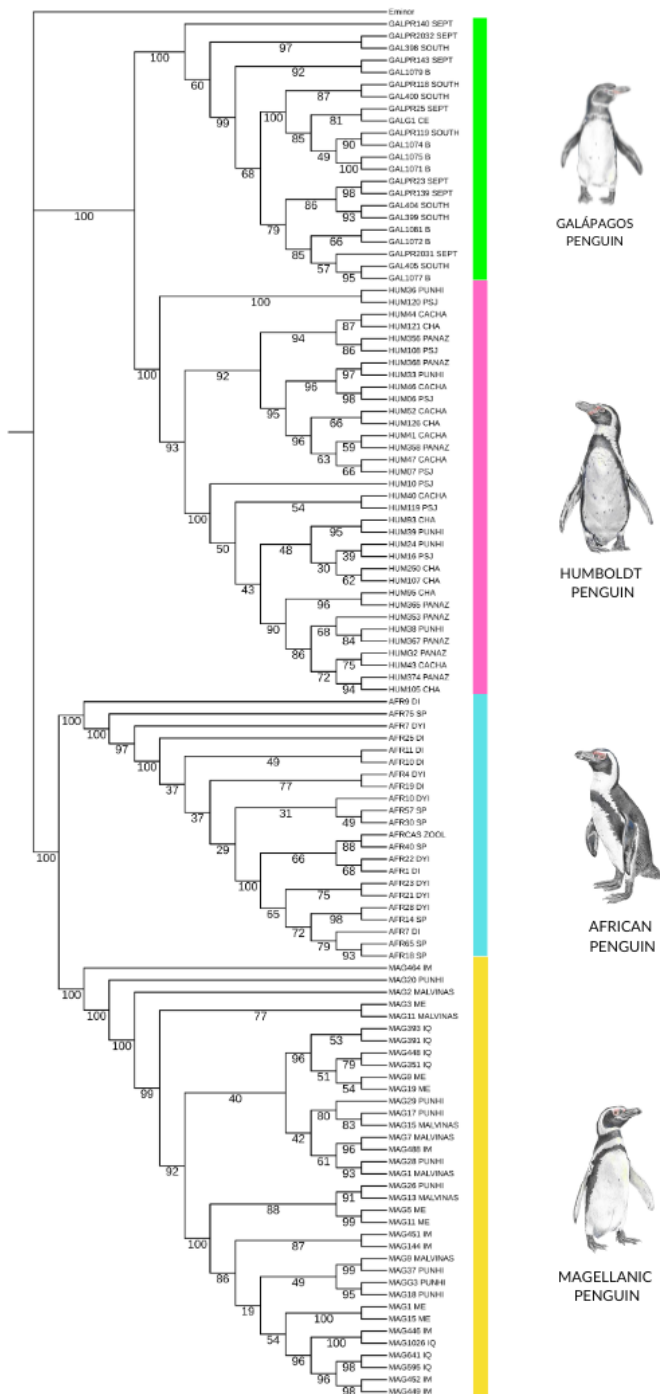

**Supplementary Figure 7. Maximum likelihood (ML) topology depicting relationships among the 4 banded penguin species. The ML tree was generated with 16,966 CDS**

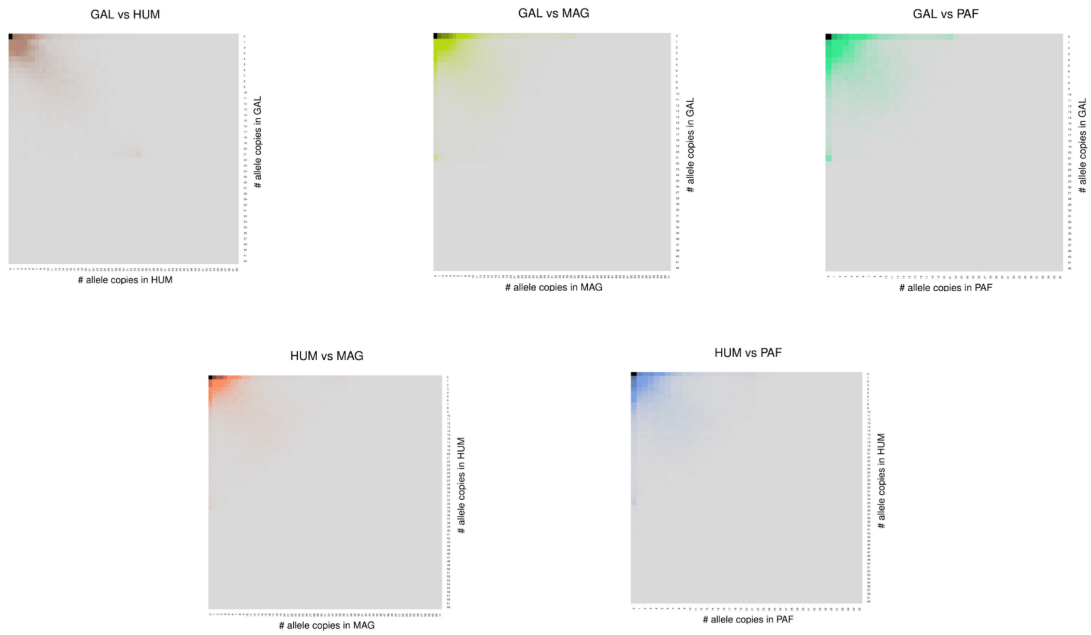

**Supplementary Figure 8. Two-dimensional frequency spectrum (2D-SFS) heatmap between banded penguin species.** Recent divergences are shown as spectra with a density trend of SNPs that are located along the diagonal. Lineages with more ancestral divergences show spectra with SNP densities that are located towards the X and Y axes indicating opposite evolutionary trends. Each figures indicate the pairwise comparison by GAL (Galápagos), HUM (Humboldt), MAG (Magellanic), PAF (African penguin).



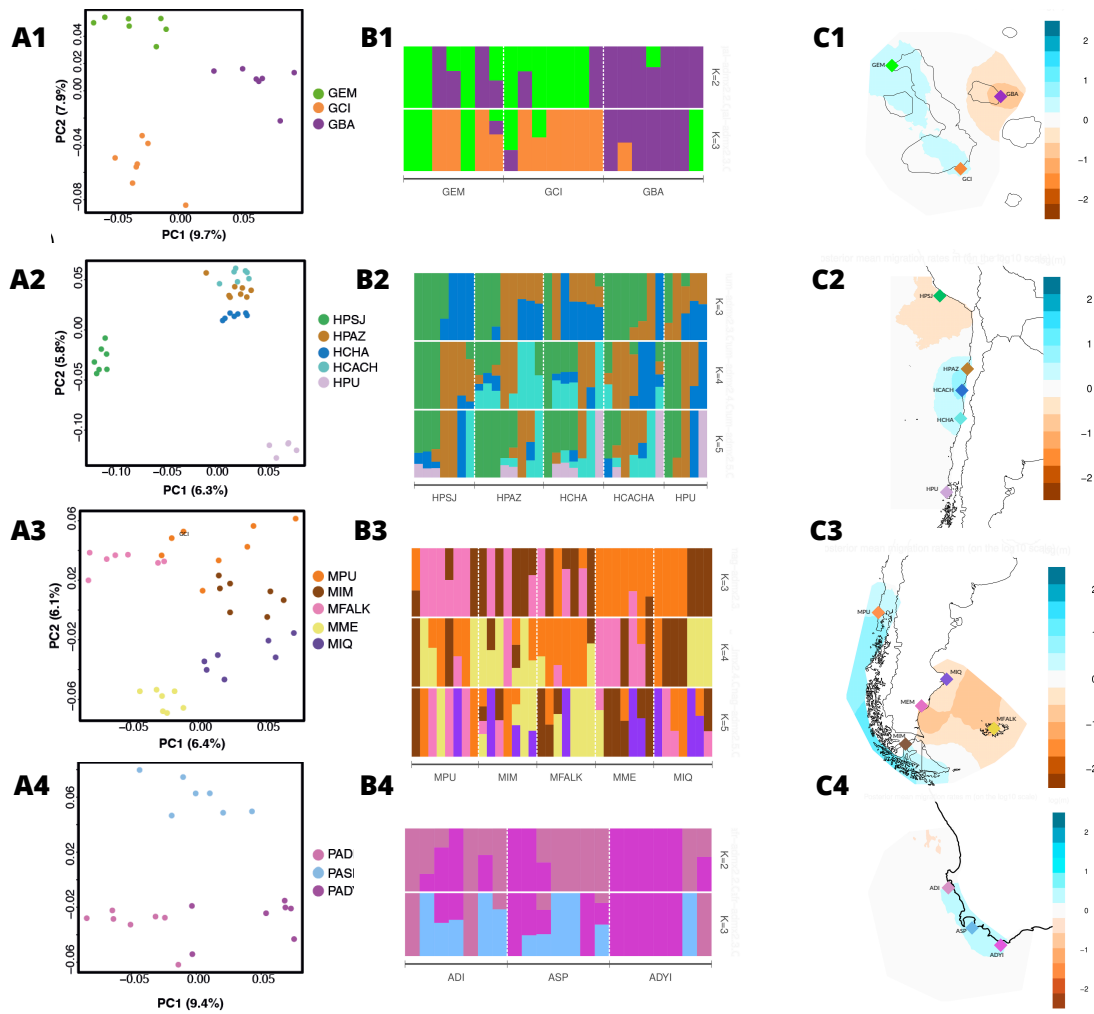

**Supplementary Figure 9. Population structure of the Galápagos, Humboldt, Magellanic, and African Penguins.** (A) Principal component analysis of 5000 informative SNPs within each of the 4 banded penguin species. (B) Intraspecific ADMIXTURE analysis for each species of banded penguin (C) Spatial genomic structure using EMMS with gene flow corridors indicated in blue and barriers to gene flow in orange. Breeding colonies of Galápagos penguin: El Muñeco (GEM), Caleta Iguana (GCI), Bartolomé (GBA); Humboldt penguin: Punta San JUAN (HPSJ), Pan de Azucar (HPAZ), Isla Chañaral (HCHA), Isla Cachagua (HCACH), and Puñihuil (HPU); Magellanic penguin: Puñihuil (MPU), Isla Magdalena (MIM), Malvinas/Falkland Island (MFALK), Monte Entrance (MME), and Isla Quiroga (MIQ); African penguin: Dassen Island (ADI), Stony Point (ASP), Dyer Island (ADYI).

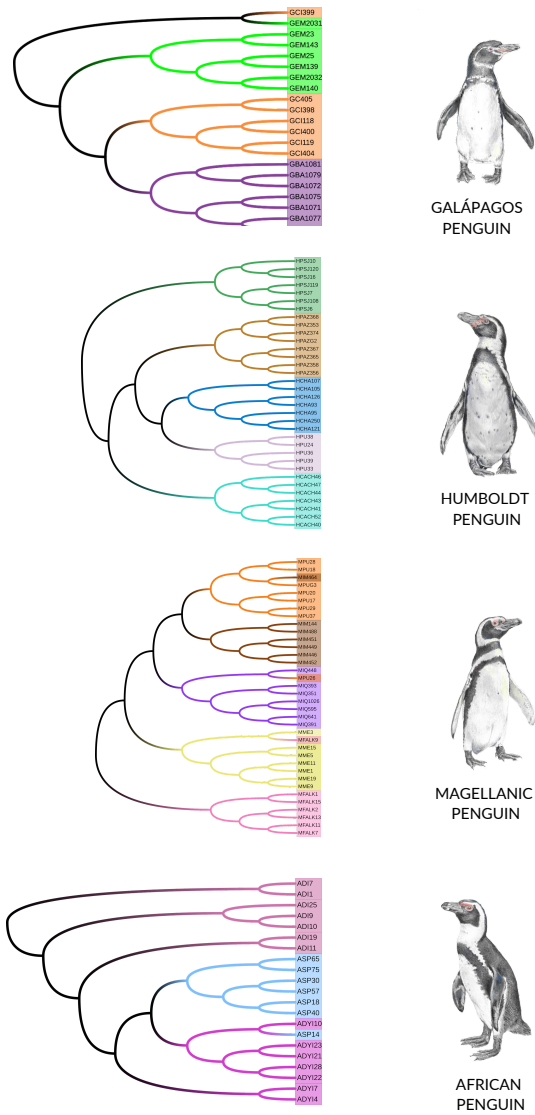

**Supplementary Figure 10. Unrooted topology for all individuals from each species.** Topology using informative SNPs indicating the genealogical relationships of individuals by breeding colonies (SNPs dataset for each are indicated at Table S2). The acronyms for each reproductive colony are detailed in Table S1.

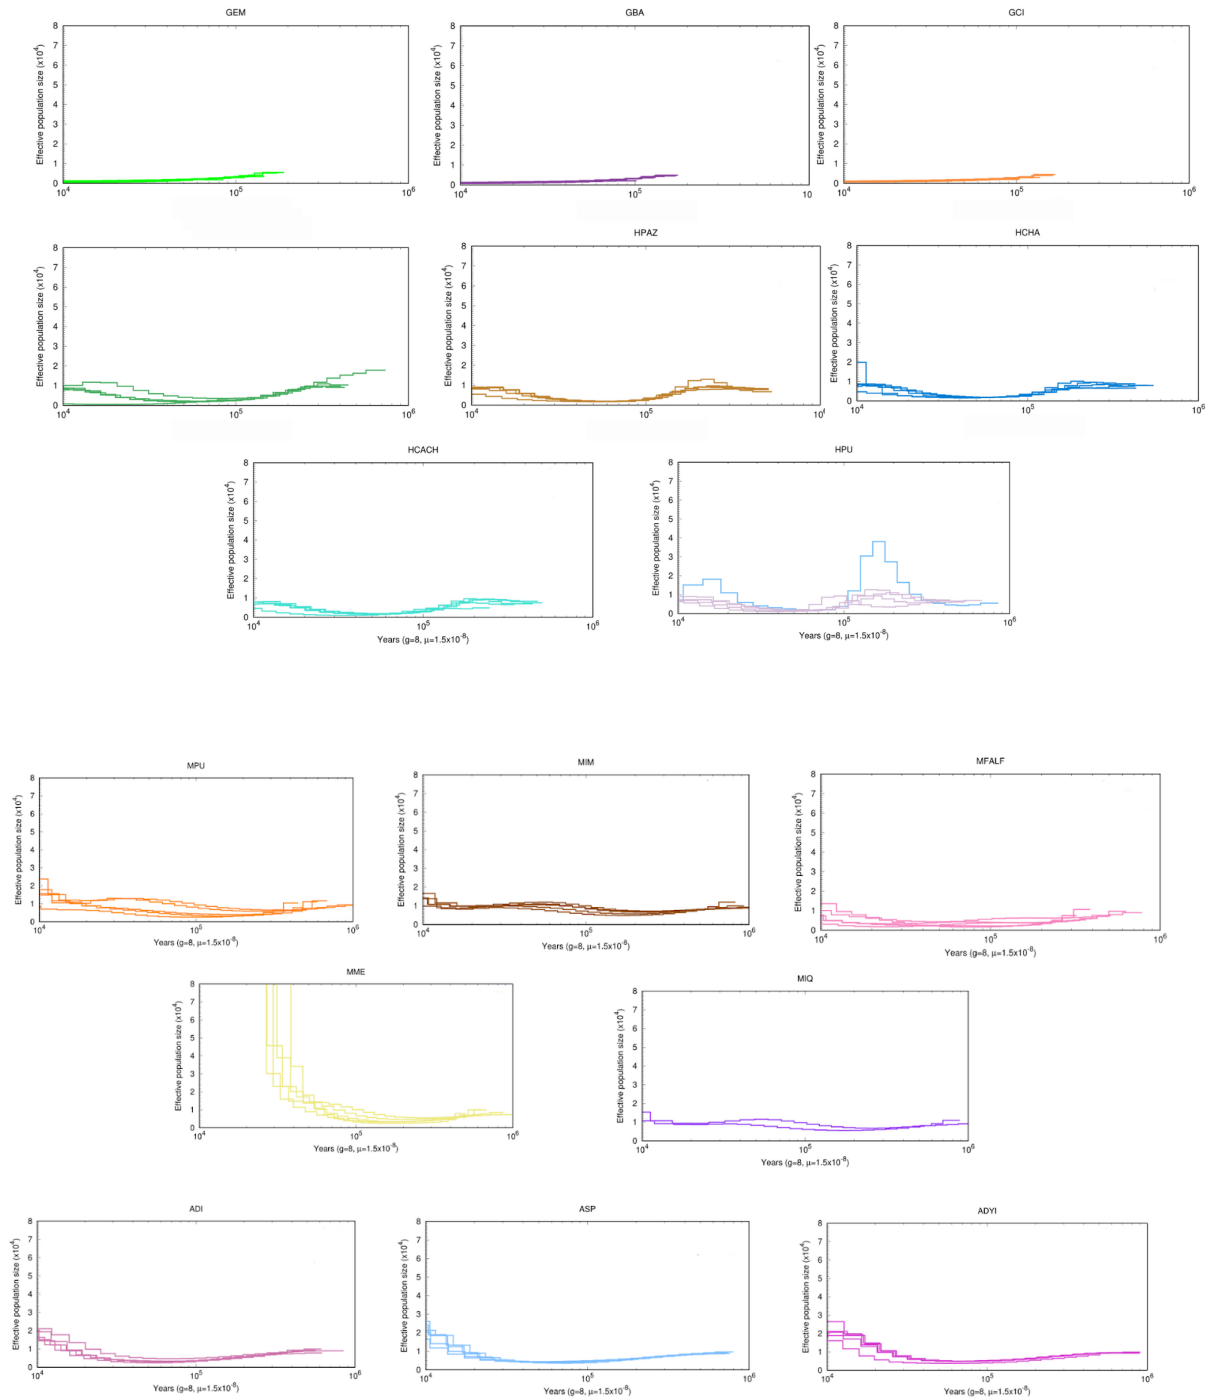

**Supplementary Figure 11. Pairwise sequentially Markovian coalescent (PSMC) estimates of the effective population size ( $N_e$ ) in the 16 banded penguin populations sampled. Lines represent results obtained from each individual belonging to the same breeding colony. The acronyms for each reproductive colony are detailed in Table S1.**

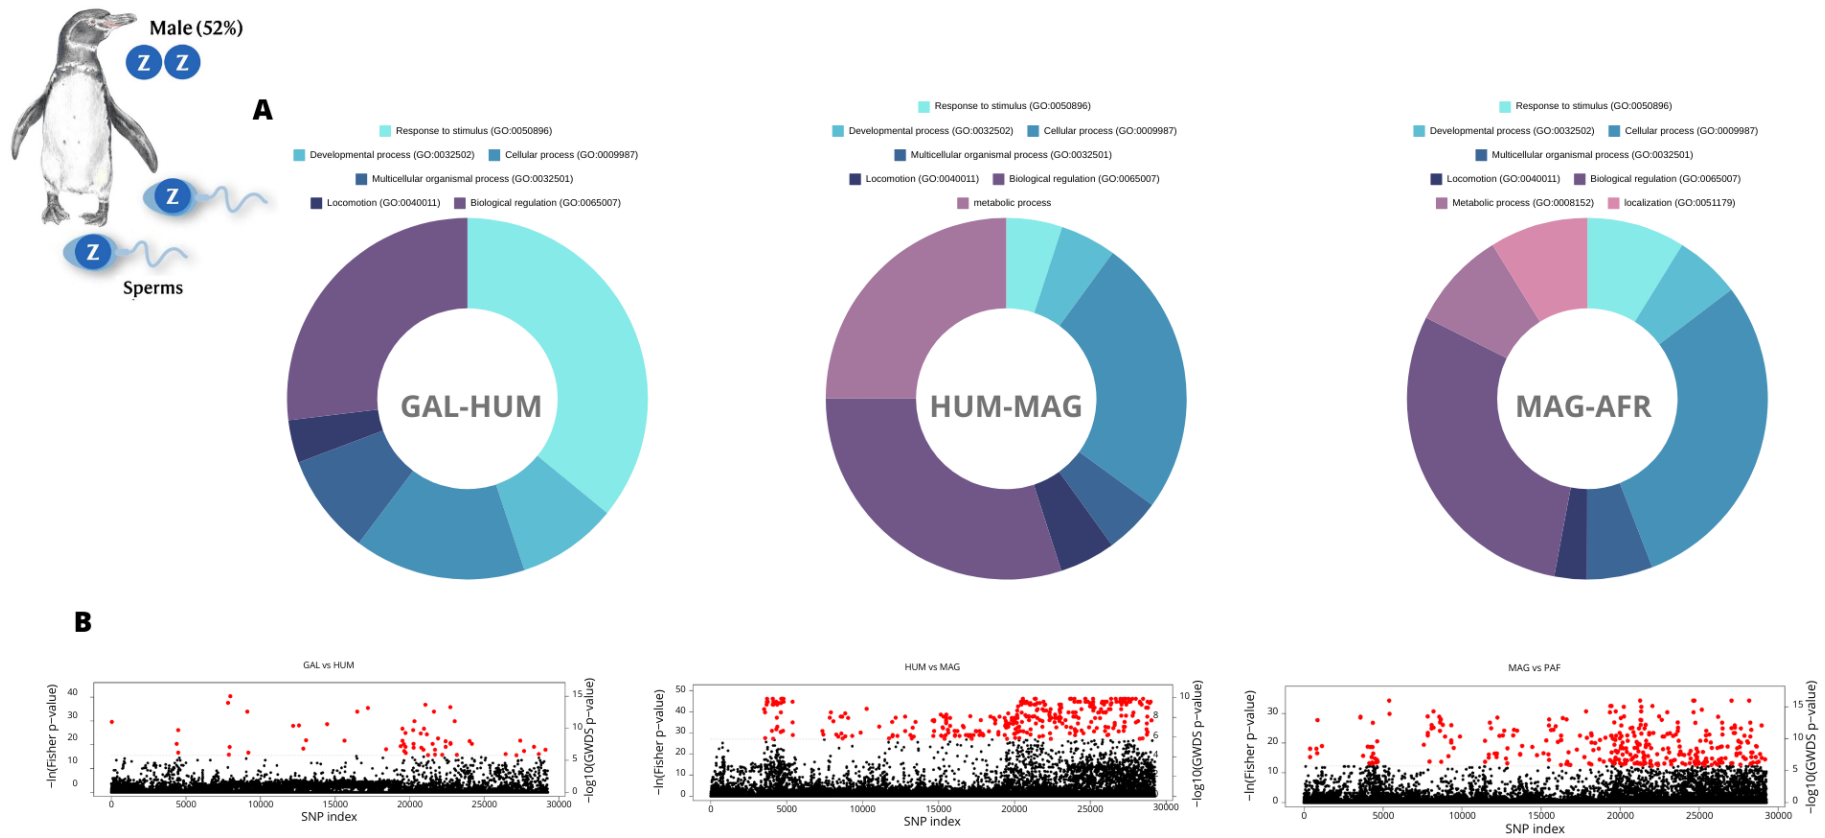

**Supplementary Figure 12. ZZ sex-linked scaffolds compared between banded penguin species. (A) Primary Gene Ontology and enrichment analysis. (B) Manhattan plots illustrate the SNPs and their degree of differentiation.**

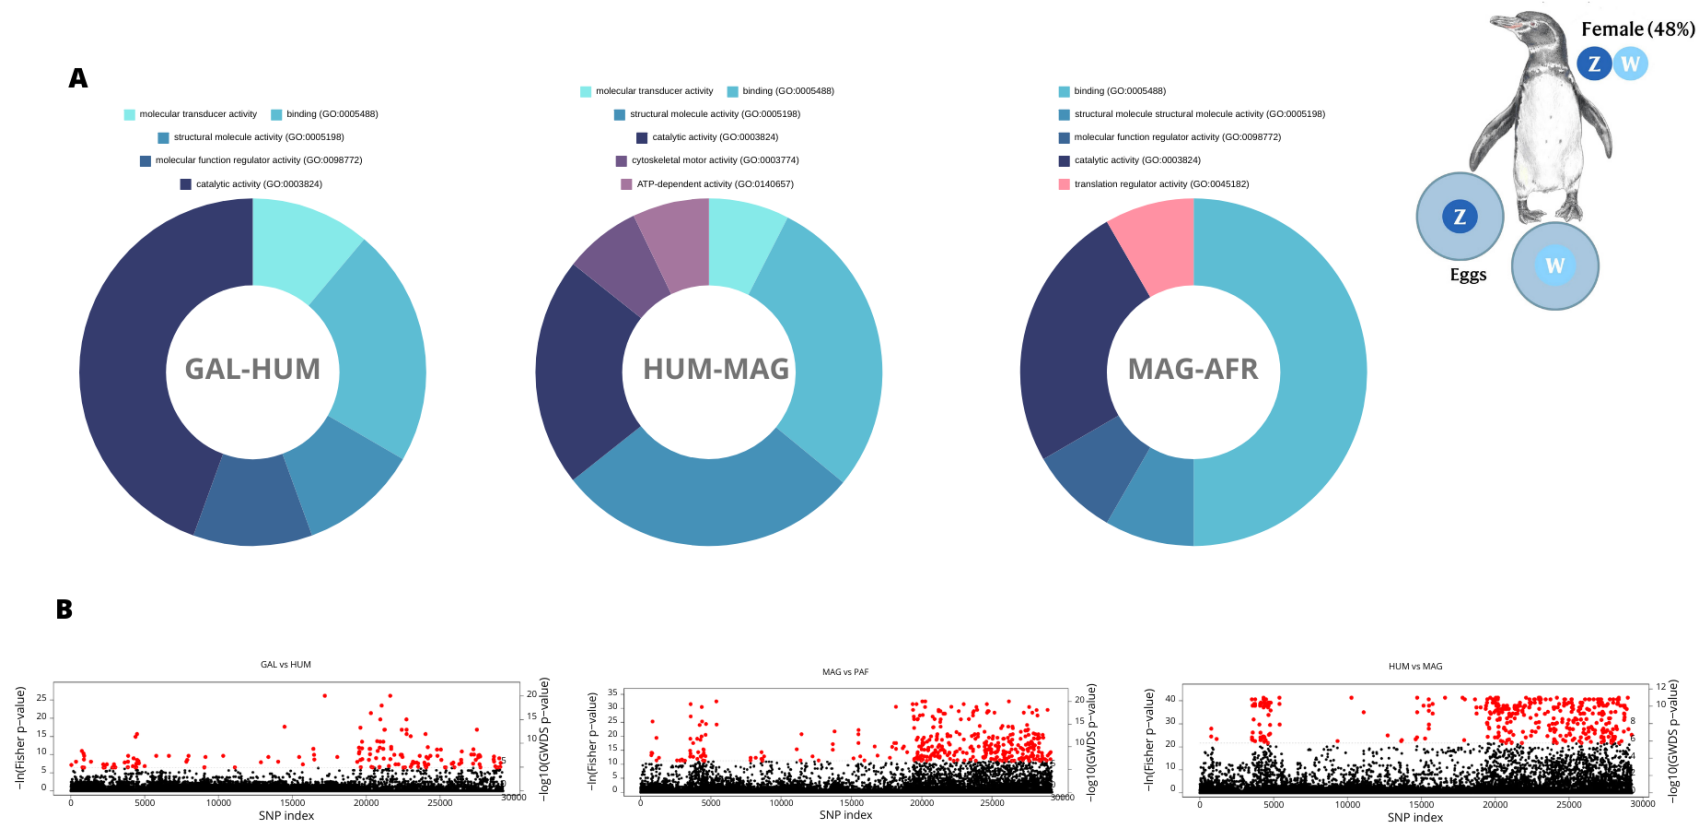

**Supplementary Figure 13. ZW sex-linked scaffolds divergent selection between pairwise Spheniscus species. (A)** The primary Gene Ontology and enrichment analysis of selection analysis between pairwise species **(B)** The Manhattan plots illustrate the SNPs between pairwise species and their degree of differentiation.

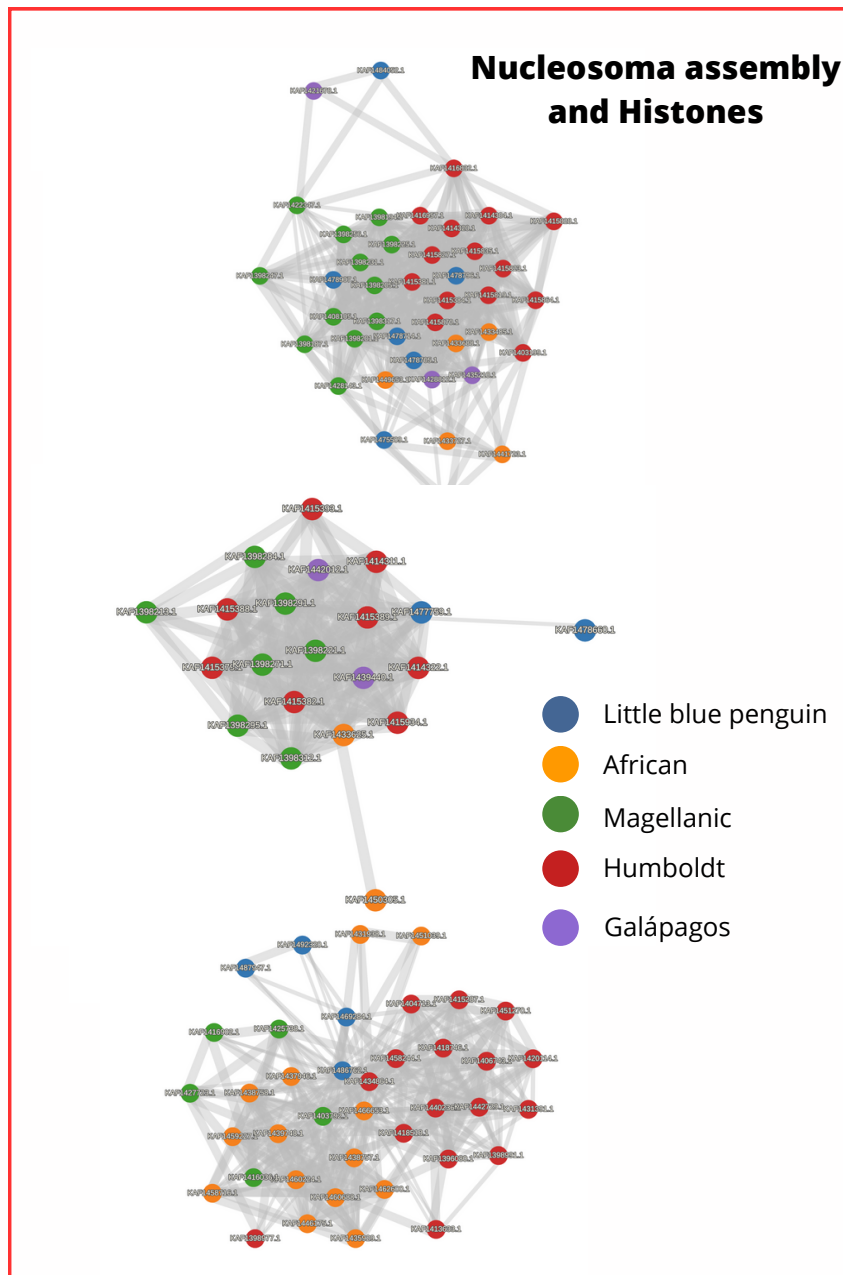

**Supplementary Figure 14. Diversification of gene families in banded penguin species compared to the Little penguin, *Eudyptula minor*.** Three different networks associated with the expansion of nucleosome assembly gene families among species.

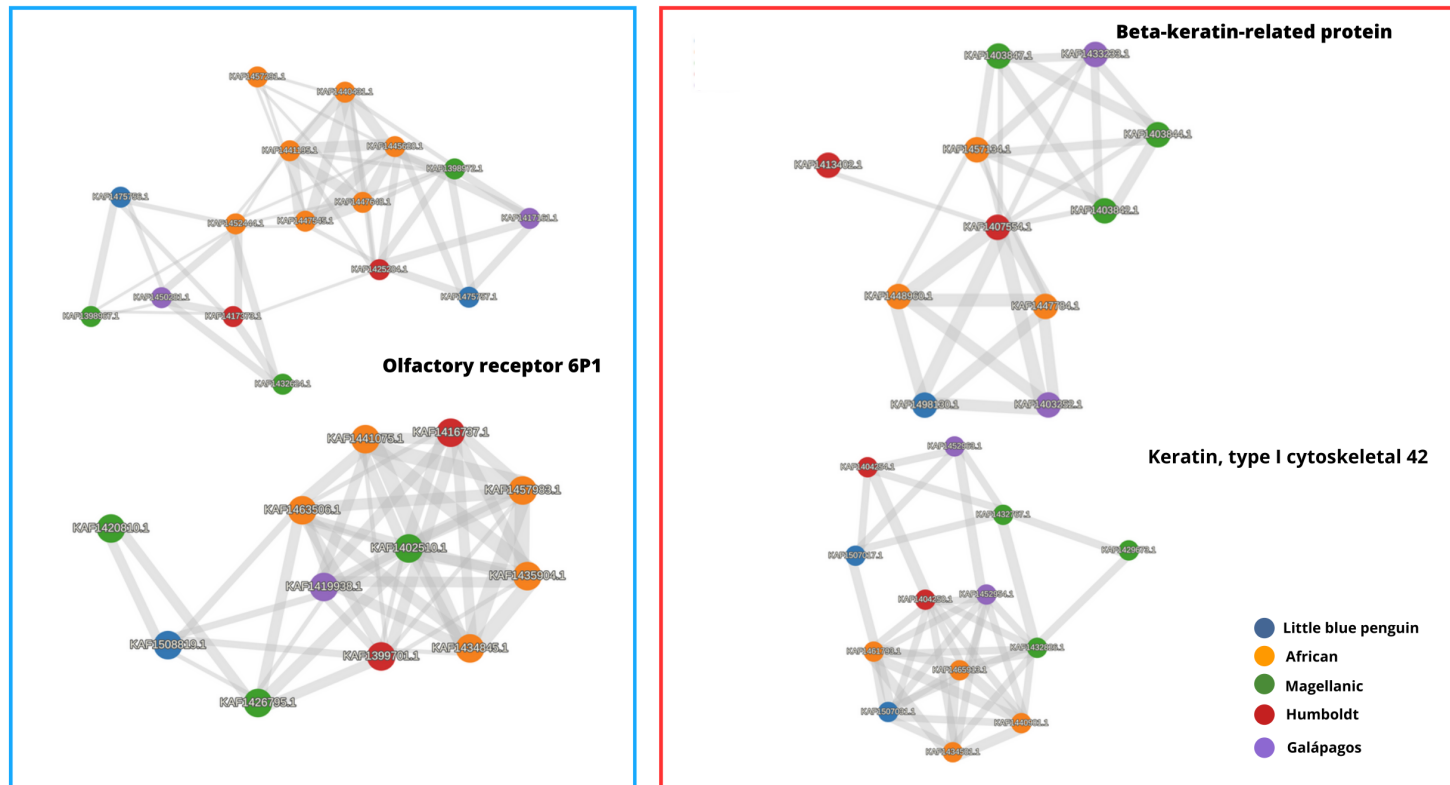

**Supplementary Figure 15. Gain of gene families between Magellanic and African penguins.** Left: diversification of olfactory receptor (ORs) gene families 6F1 and 6P1. Right: expansion of feather keratin gene families Beta-keratin-related protein and Keratin type I.

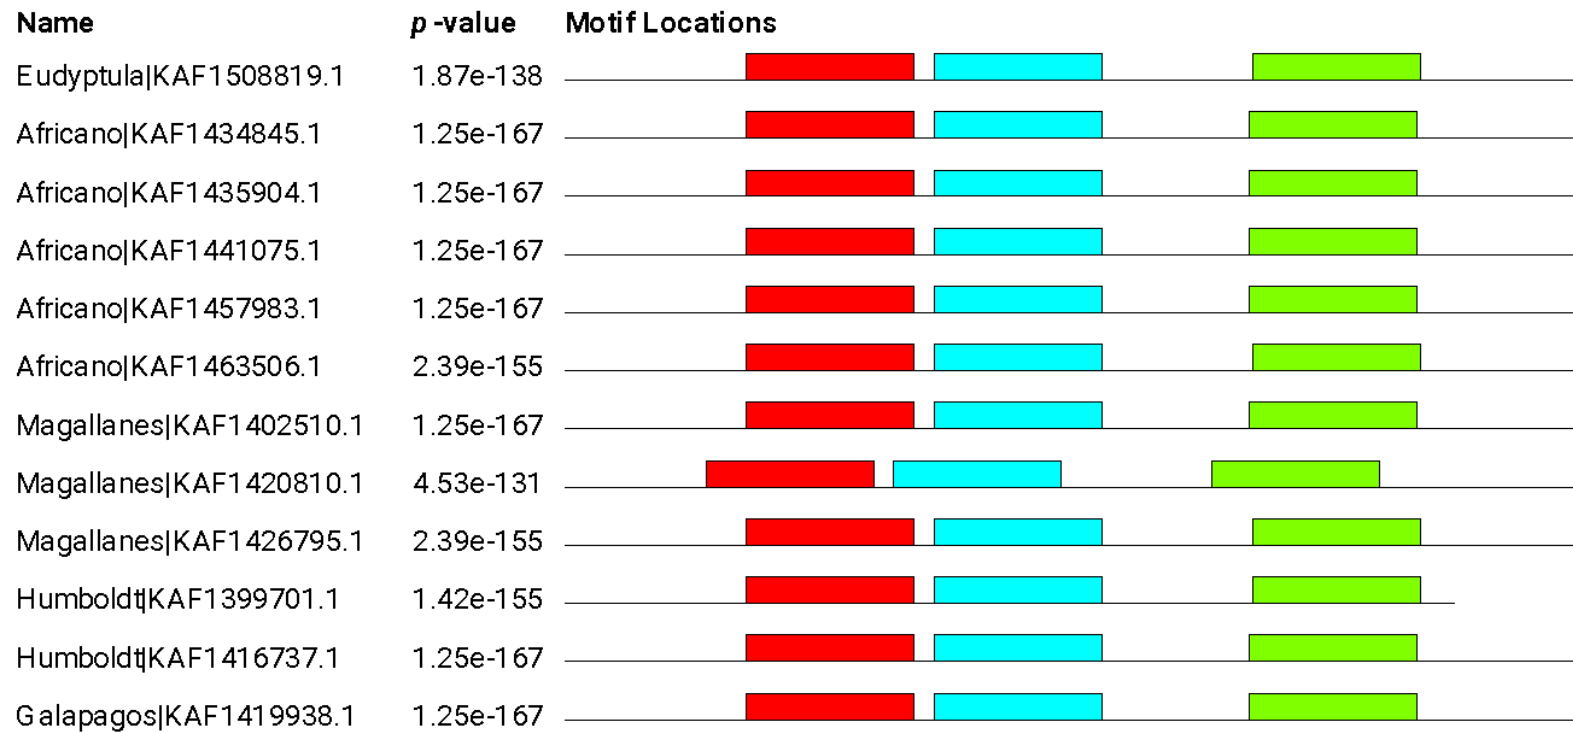

| Motif | Symbol | Motif Consensus                                     |
|-------|--------|-----------------------------------------------------|
| 1.    |        | EQHLHTPMYTF LGT LSFLETWYSSTILPRLASFLTGDRTISAHGCAQF  |
| 2.    |        | VATECYLLGAMSYDQYLAICQPLLYASLMTWKICLQLVAAASWLVGMLVSA |
| 3.    |        | SFLSILFPFLFTLVSYVCITAAILRISNNMGRQKTFSTCFSHLIVVTIFY  |

**Supplementary Figure 16. Protein motif differences in olfactory receptor families between little penguin and banded penguin.** Comparison shows how conservative are the primary amino acid sequences.



| Name                   | p-value   | Motif Locations                                                                     |
|------------------------|-----------|-------------------------------------------------------------------------------------|
| Eudyptula KAF1506244.1 | 6.90e-170 |  |
| Galapagos KAF1409083.1 | 5.23e-176 |  |
| Galapagos KAF1445849.1 | 7.41e-176 |  |

| Motif | Symbol | Motif Consensus |
|-------|--------|-----------------|
|-------|--------|-----------------|

- |    |                                                                                   |                                                    |
|----|-----------------------------------------------------------------------------------|----------------------------------------------------|
| 1. |  | PHKGKINKVLLFDKGCTFLCVFGLTGEKLPYESLHALQSAMQIFNSCSTM |
| 2. |  | HPPSDHLHFLSSGATRPAFLLPSGRDVDEVLRKYVPEAALRKIYDSMPLG |
| 3. |  | TVGDRRRQYFLICGQVLGEVCEAEQLANAGEVILSATCWELCEQHRLRTK |

**Supplementary Figure 17. Protein motif differences in Spermatogenesis gene family between little penguin and Galápagos penguin.** Comparison shows the non-synonymous substitution and the possible implication in the protein secondary structure conformation.

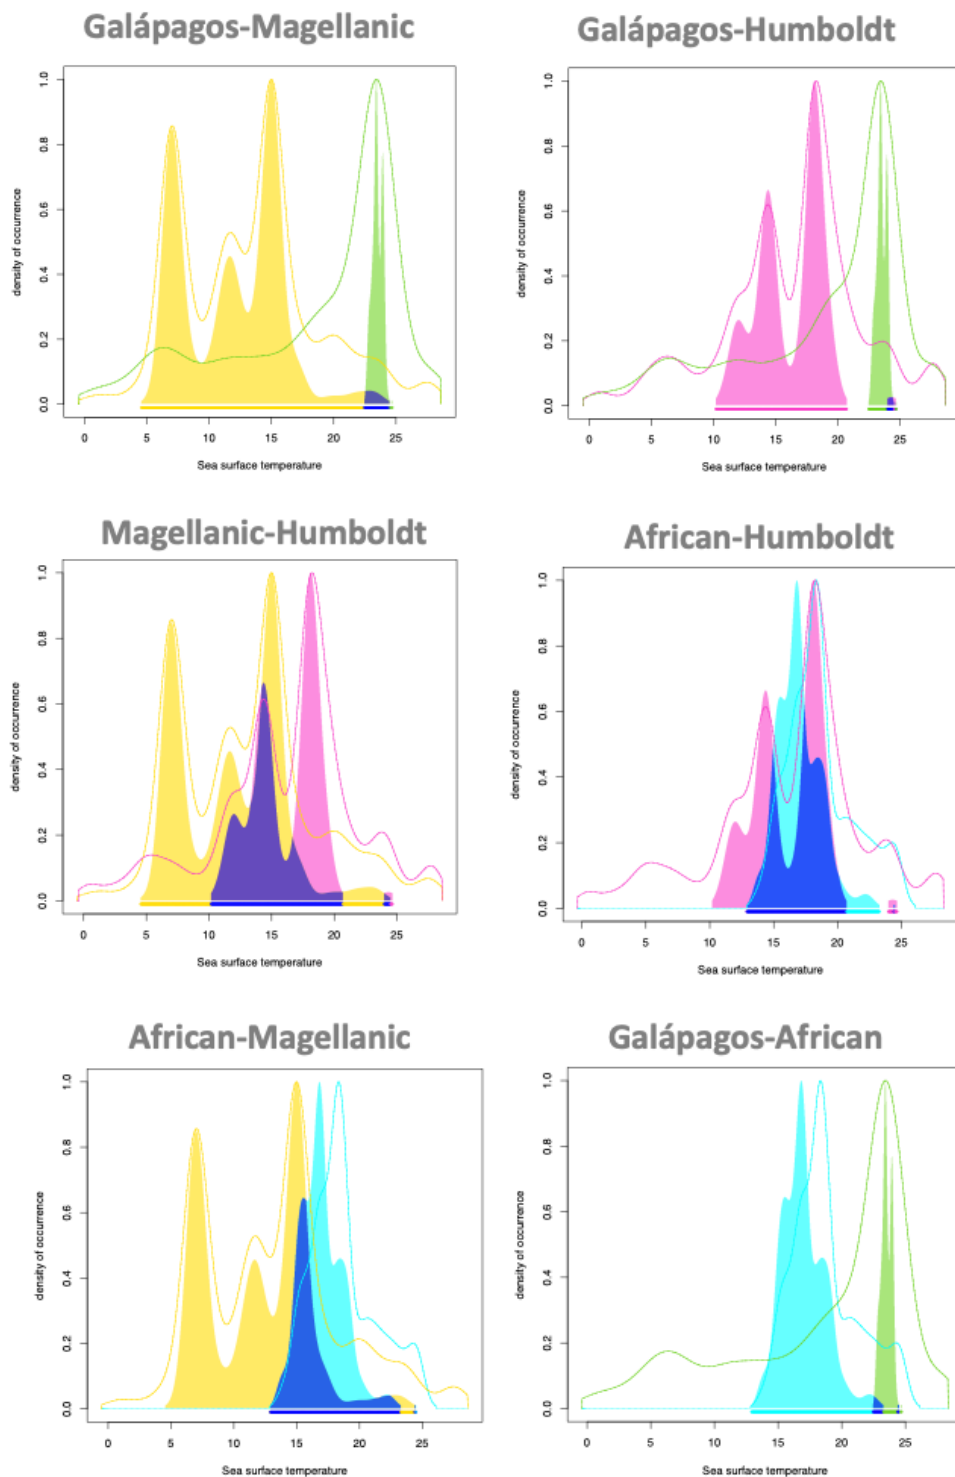

**Supplementary Figure 18. Overlap in thermal niche between banded penguin species.** Overlap between species: Galápagos (green) and Humboldt penguins (pink); Humboldt (pink) and Magellanic penguins (yellow); Magellanic (yellow) and African penguins (light blue); the

degree if niche overlap is indicated in purple and dark blue. See univariate D overlap values and dynamic niche overlap values in Table S21.

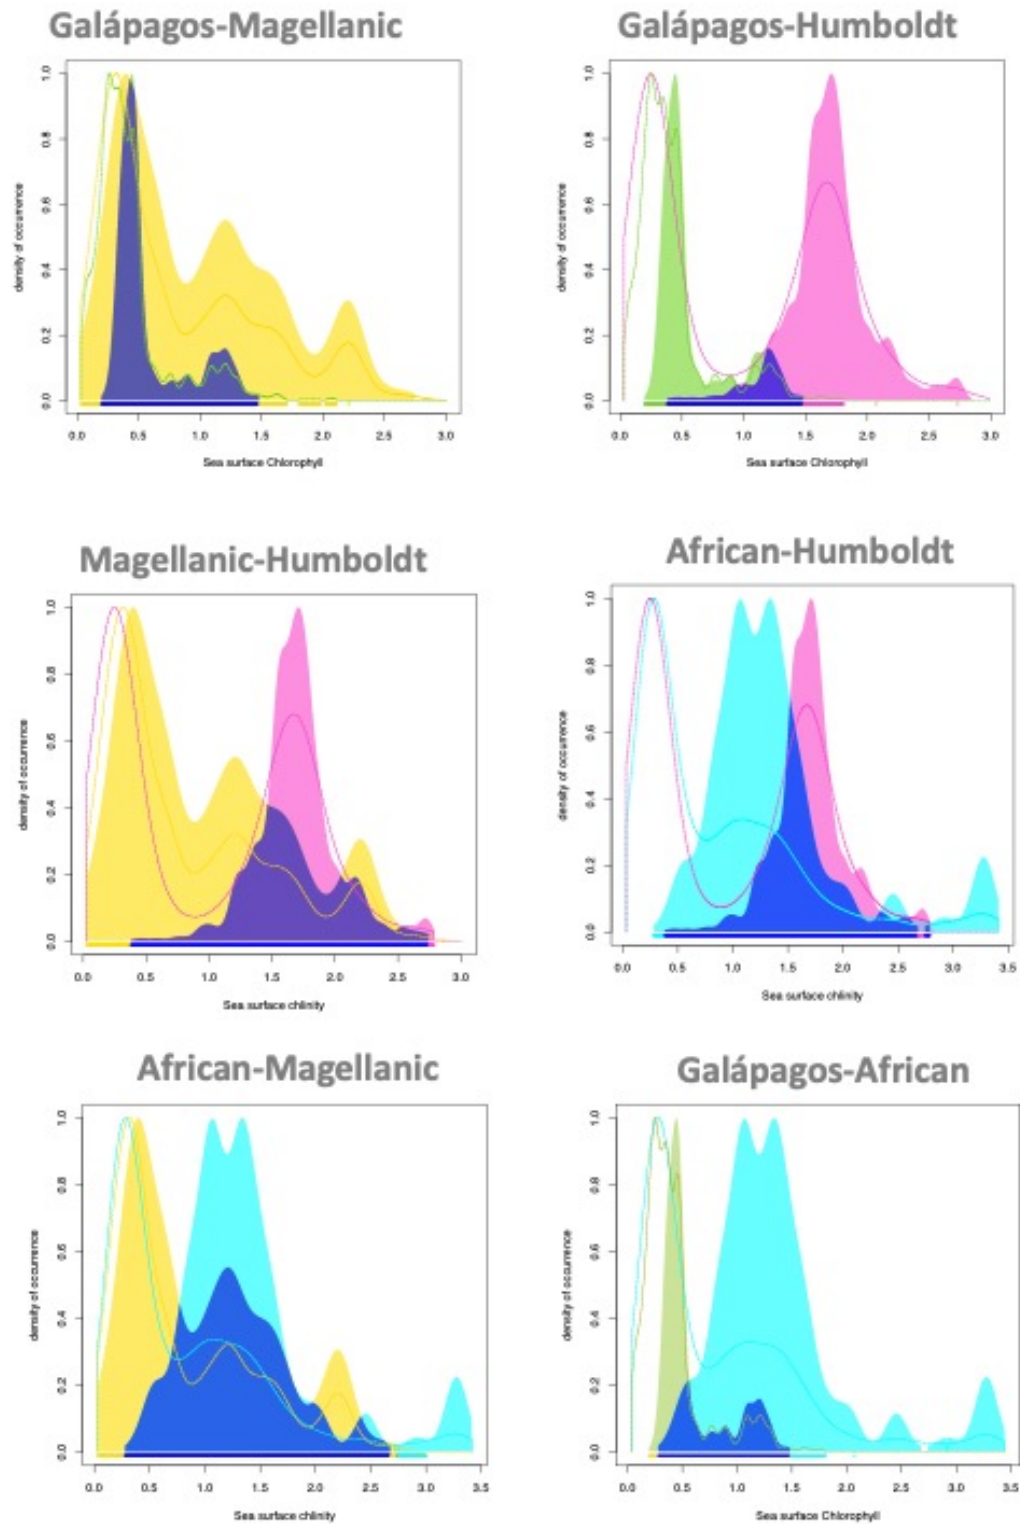

**Supplementary Figure 19. Overlap in chlorophyll niche between banded penguin species.** Overlap between species: Galápagos (green) and Humboldt penguins (pink); Humboldt (pink)

and Magellanic penguins (yellow); Magellanic (yellow) and African penguins (light blue); the degree of niche overlap is indicated in purple and dark blue. See univariate D overlap values and dynamic niche overlap values in Table S21.

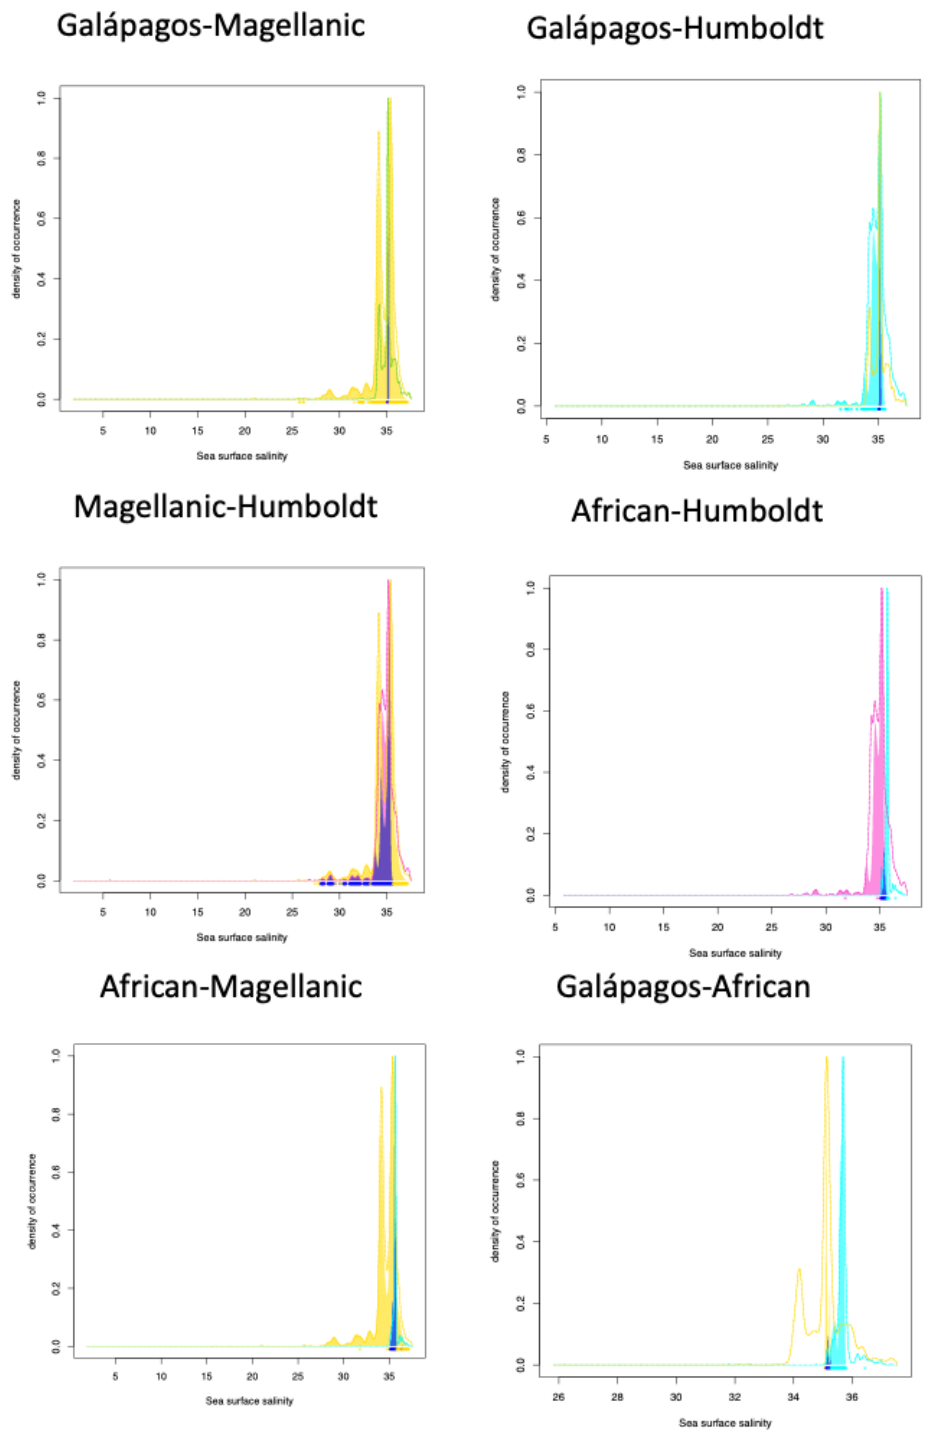

**Supplementary Figure 20. Salinity Niche overlaps between pairwise banded penguin species.** Overlap between pairwise species: Galápagos (green) and Humboldt penguins (pink); Humboldt (pink) and Magellanic penguins (yellow); Magellanic (yellow) and African penguins

(light blue); the degree of niche overlap is indicated in purple and dark blue. See univariate D overlap values and dynamic niche overlap values in Table S23.

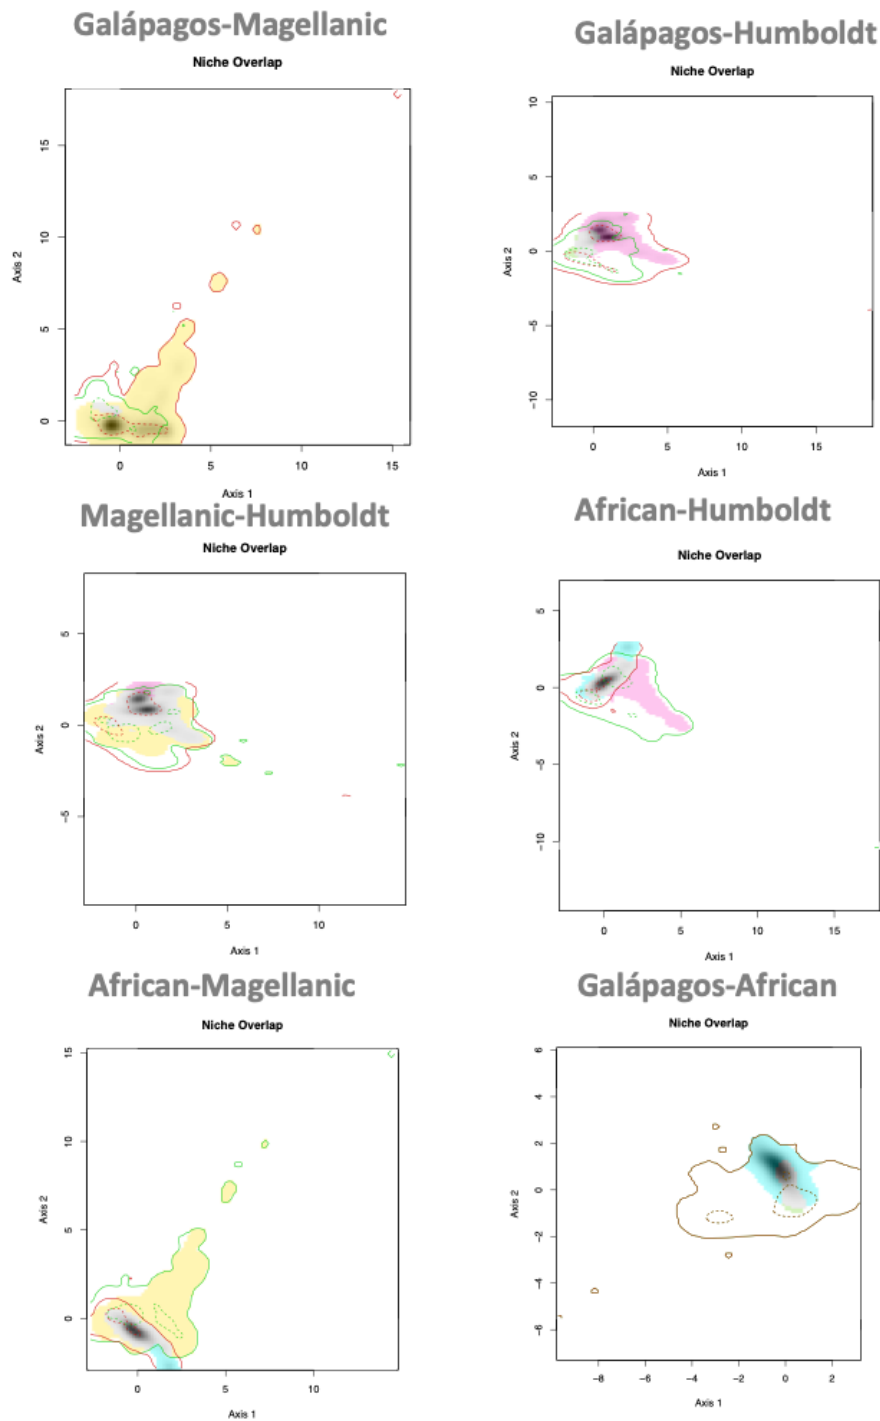

**Supplementary Figure 21. Overall Niche overlaps between banded penguin species.** See niche D overlap values in Table S24.

## Galápagos penguins

### SST

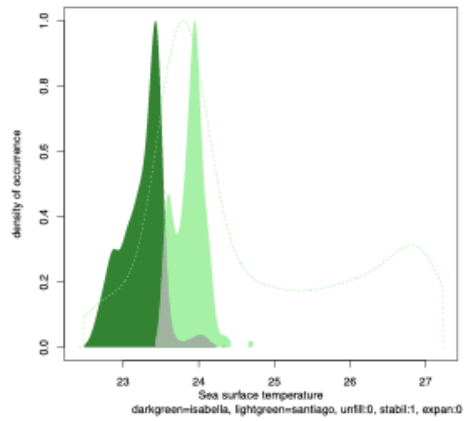

### Chlorophyll

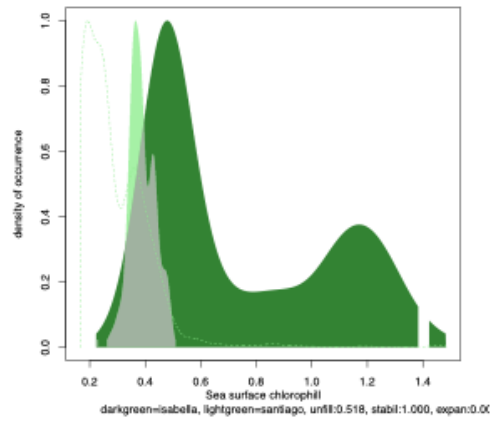

### Salinity

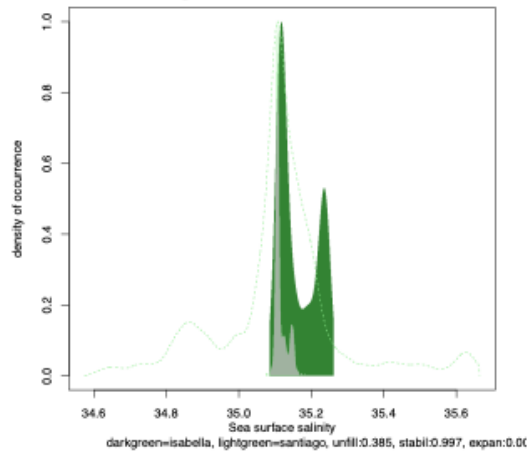

### Niche Overlap 0.05 subpopl Galapagos

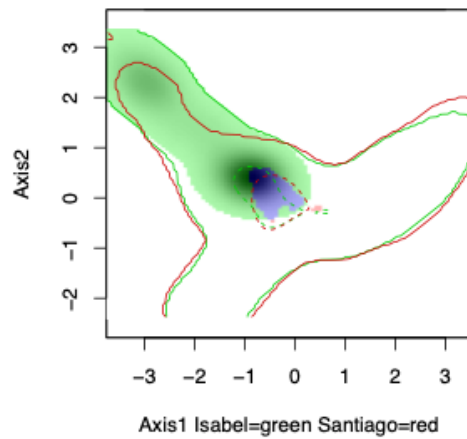

**Supplementary Figure 22. Ecological Niche overlaps between EEMS genetic groups for Galápagos penguins.** Niche overlap for the EEMS genetic cluster in different tones of green for Galápagos penguin. See all D overlap values and dynamic niche overlap values respectively in Table S25 and S26.

## Humboldt penguins SST

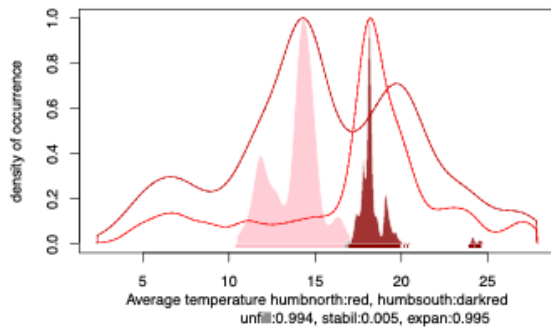

## Chlorophyll

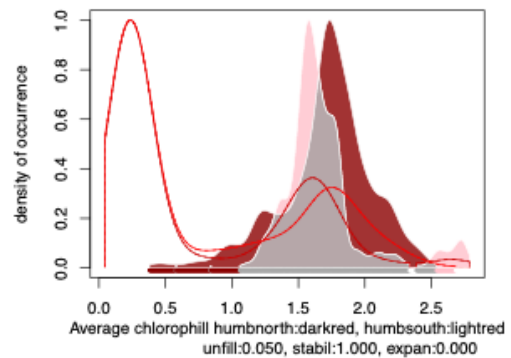

## Salinity

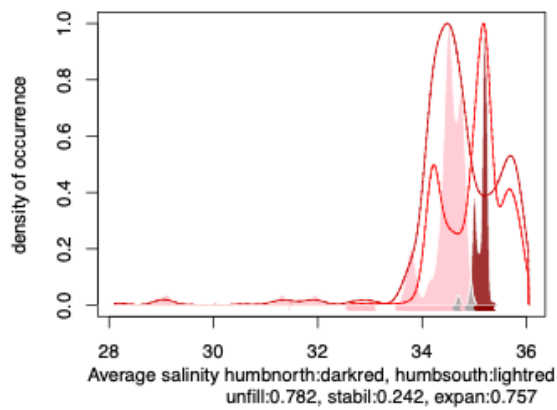

## Niche Overlap 0.09 Humboldt subpopulations

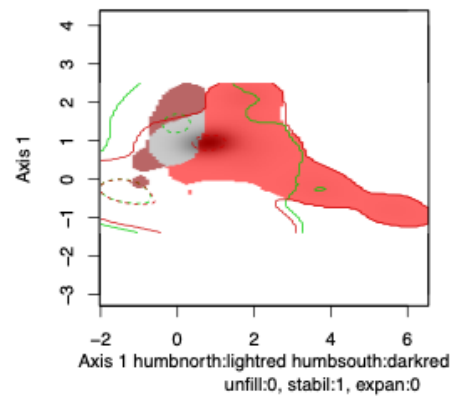

**Supplementary Figure 23. Ecological Niche overlaps between EEMS genetic groups for Humboldt penguins.** Niche overlap for the EEMS genetic cluster in different tones of pink/red for Humboldt penguin. See all D overlap values and dynamic niche overlap values respectively in Table S25 and S26.

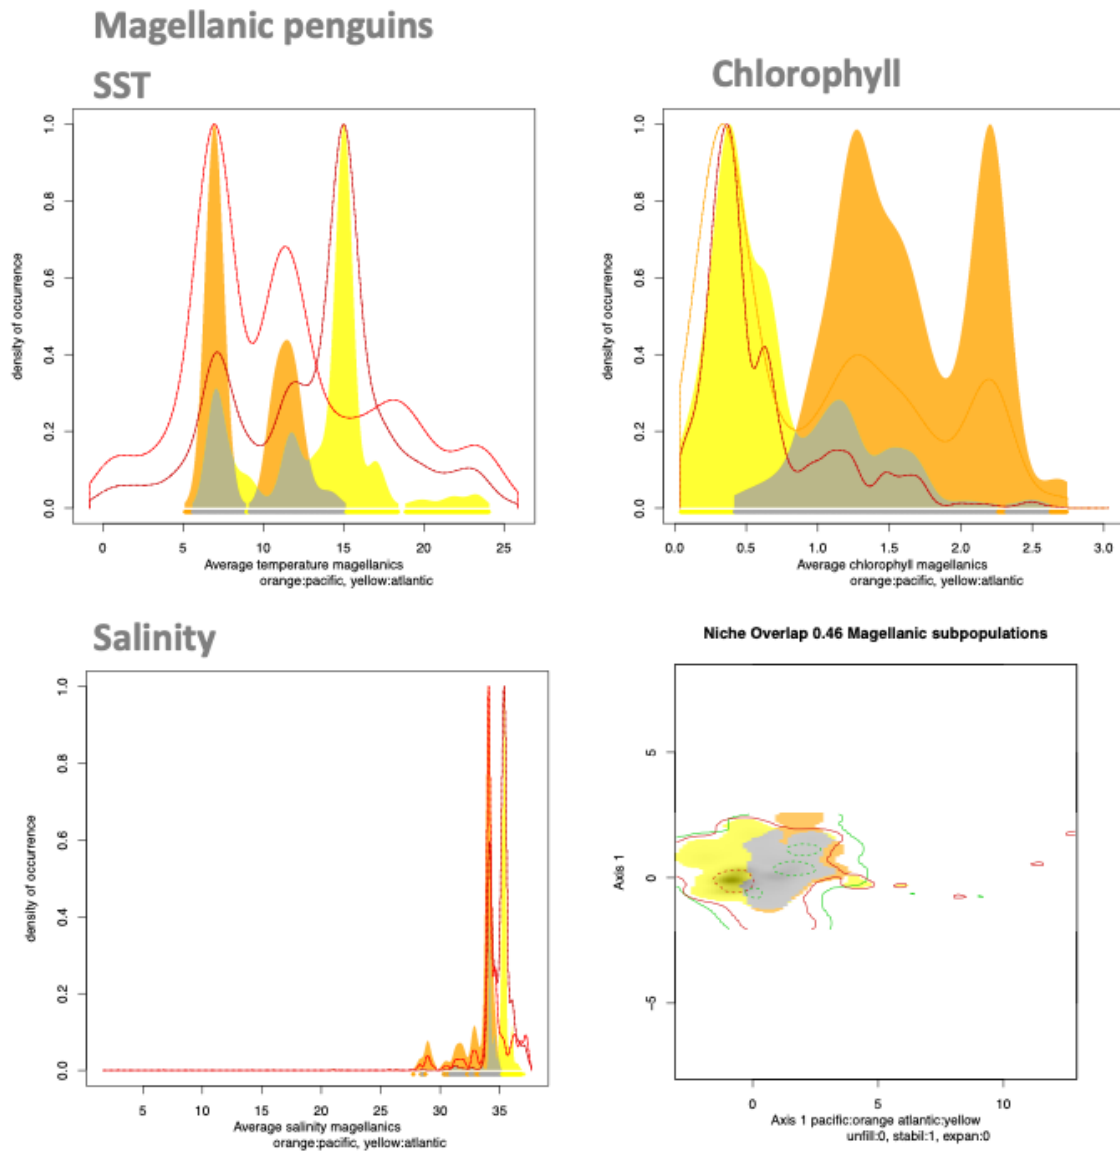

**Supplementary Figure 24. Ecological Niche overlaps between EEMS genetic groups for Magellanic penguins.** Niche overlap for the EEMS genetic cluster in different tones of yellow for Magellanic penguin. See all D overlap values and dynamic niche overlap values respectively in Table S25 and S26.



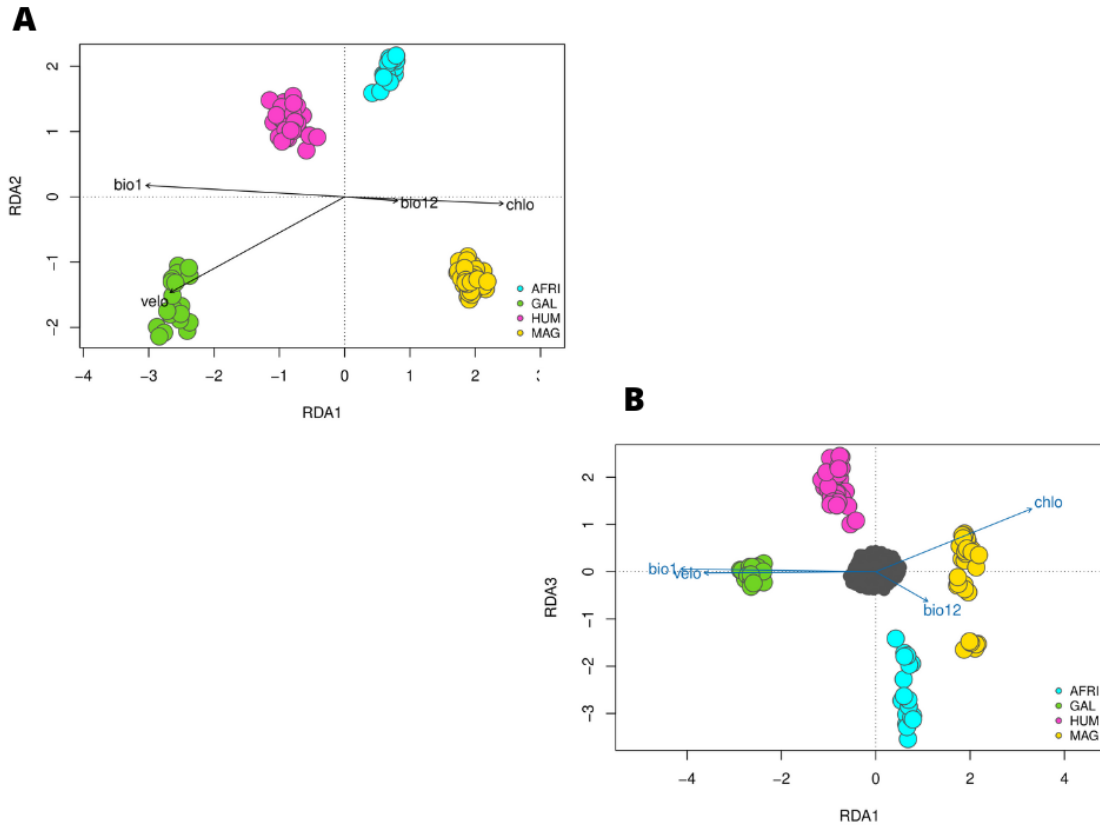

**Supplementary Figure 25. Genotype Environment Analysis of the four *Spheniscus* species.** The three significant RDA axes ( $p$ -value < 0.05) illustrate the relationships among genomic markers, individual characteristics, and environmental influences among penguin species. A) RDA1 vs RDA2 and B) RDA1 vs RDA3. Colored circles represent samples from the different populations and arrows signify environmental variables.

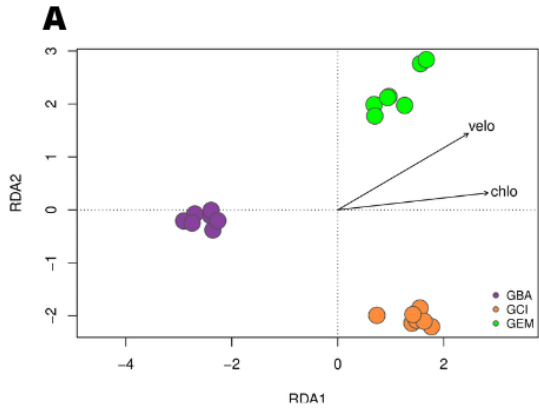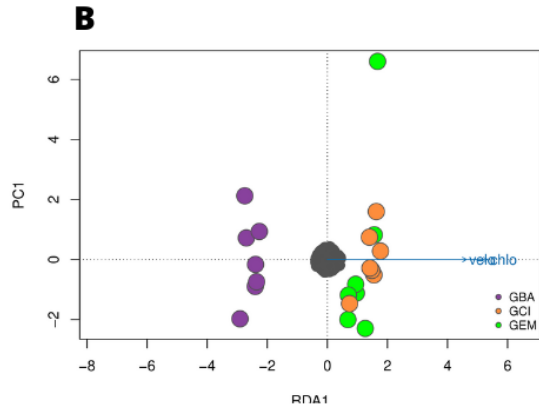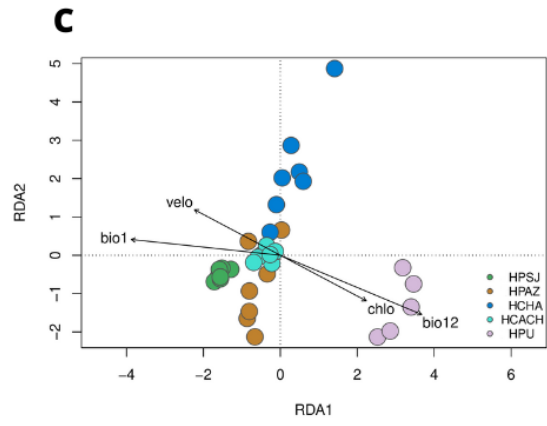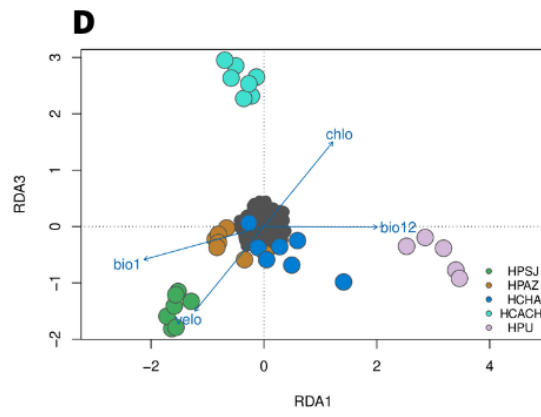

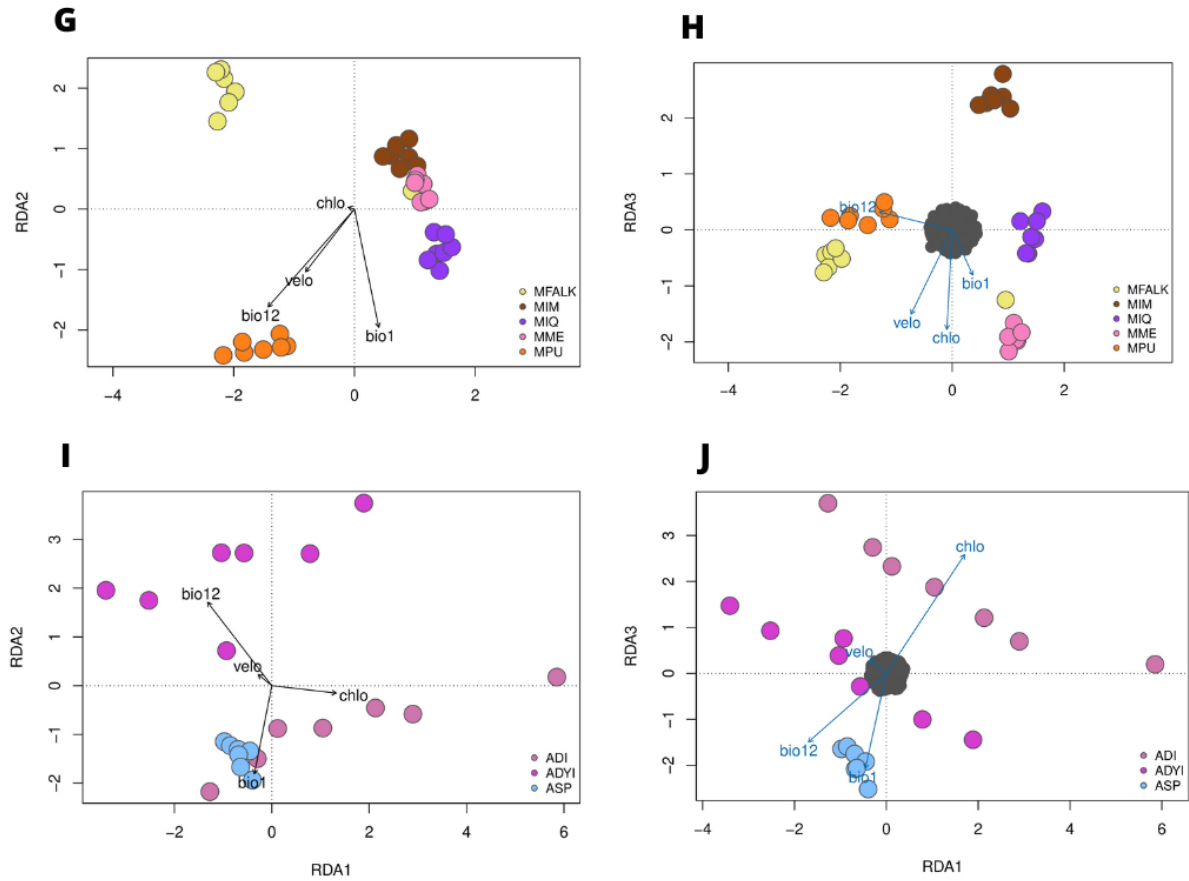

**Supplementary Figure 26. Genotype Environment Analysis of the Galápagos and Humboldt penguin populations.** Significant RDA axes ( $p$ -value < 0.05) illustrate the relationship among genomic markers, individual traits, and environmental factors across penguin species A-B) RDA1 vs RDA2 and RDA1 vs RDA3 of Galápagos penguins, B-C) RDA1 vs RDA2 and RDA1 vs RDA3 of Humboldt penguins, E-F) RDA1 vs RDA2 and RDA1 vs RDA3 of Magellanic penguins and E-F) RDA1 vs RDA2 and RDA1 vs RDA3 of African penguins.

## TABLES

**Supplementary Table 1. Average genomic coverage per individual and species. Samples in bold were obtained from Vianna et al. (2020).**

| <b>SAMPLE</b> | <b>MEAN COVERAGE</b> | <b>SPECIES</b> |
|---------------|----------------------|----------------|
| 10ADI         | 5.1                  | AFR            |
| 10ADYI        | 9.79                 | AFR            |
| 11ADI         | 5.97                 | AFR            |
| 14ASP         | 7.48                 | AFR            |
| 18ASP         | 6.68                 | AFR            |
| 19ADI         | 8.10                 | AFR            |
| 1ADI          | 6.01                 | AFR            |
| 21ADYI        | 10.72                | AFR            |
| 22ADYI        | 6.29                 | AFR            |
| 23ADYI        | 8.83                 | AFR            |
| 25ADI         | 5.10                 | AFR            |
| 28ADYI        | 8.50                 | AFR            |
| 30ASP         | 6.85                 | AFR            |
| 40ASP         | 7.17                 | AFR            |
| 4ADYI         | 6.18                 | AFR            |
| 57ASP         | 6.36                 | AFR            |
| 65ASP         | 5.76                 | AFR            |
| 75ASP         | 3.35                 | AFR            |
| 7ADI          | 5.08                 | AFR            |
| 7ADYI         | 3.56                 | AFR            |
| 9ADI          | 1.84                 | AFR            |
| <b>CASCS1</b> | <b>30.42</b>         | <b>AFR</b>     |
| <b>G1</b>     | <b>36.93</b>         | <b>GAL</b>     |
| GAPE_1071     | 9.07                 | GAL            |
| GAPE_1072     | 8.63                 | GAL            |
| GAPE_1074     | 8.14                 | GAL            |
| GAPE_1075     | 5.06                 | GAL            |
| GAPE_1077     | 5.08                 | GAL            |
| GAPE_1079     | 7.42                 | GAL            |
| GAPE_1081     | 7.16                 | GAL            |
| GAPE_398      | 5.00                 | GAL            |
| GAPE_399      | 7.62                 | GAL            |
| GAPE_400      | 6.16                 | GAL            |
| GAPE_404      | 7.33                 | GAL            |
| GAPE_405      | 4.89                 | GAL            |

|         |       |     |
|---------|-------|-----|
| PR_118  | 6.92  | GAL |
| PR_119  | 10.15 | GAL |
| PR_139  | 6.13  | GAL |
| PR_140  | 3.89  | GAL |
| PR_143  | 12.13 | GAL |
| PR_2031 | 8.50  | GAL |
| PR_2032 | 4.03  | GAL |
| PR_23   | 7.85  | GAL |
| PR_25   | 7.30  | GAL |
| CH105   | 6.96  | HUM |
| CH107   | 6.05  | HUM |
| CH121   | 12.60 | HUM |
| CH126   | 6.51  | HUM |
| CH144   | 3.59  | HUM |
| CH24    | 8.32  | HUM |
| CH250   | 3.31  | HUM |
| CH26    | 4.29  | HUM |
| CH29    | 4.88  | HUM |
| CH33    | 7.46  | HUM |
| CH353   | 7.66  | HUM |
| CH356   | 8.11  | HUM |
| CH358   | 7.72  | HUM |
| CH36    | 5.27  | HUM |
| CH365   | 6.35  | HUM |
| CH367   | 7.70  | HUM |
| CH368   | 4.92  | HUM |
| CH374   | 12.54 | HUM |
| CH38    | 5.95  | HUM |
| CH39    | 7.53  | HUM |
| CH40    | 4.78  | HUM |
| CH41    | 7.84  | HUM |
| CH43    | 12.96 | HUM |
| CH44    | 6.66  | HUM |
| CH449   | 8.36  | HUM |
| CH451   | 5.93  | HUM |
| CH452   | 8.67  | HUM |
| CH46    | 6.87  | HUM |
| CH464   | 1.74  | HUM |
| CH47    | 6.44  | HUM |
| CH488   | 6.62  | HUM |
| CH52    | 8.05  | HUM |

|           |              |            |
|-----------|--------------|------------|
| CH93      | 7.72         | HUM        |
| CH95      | 8.38         | HUM        |
| <b>G2</b> | <b>31.23</b> | <b>HUM</b> |
| PE06      | 8.43         | HUM        |
| PE07      | 7.67         | HUM        |
| PE10      | 3.26         | HUM        |
| PE108     | 11.28        | HUM        |
| PE119     | 7.02         | HUM        |
| PE120     | 4.67         | HUM        |
| PE16      | 6.05         | HUM        |
| CH17      | 4.50         | MAG        |
| CH18      | 6.52         | MAG        |
| CH20      | 2.75         | MAG        |
| CH28      | 7.23         | MAG        |
| CH37      | 5.23         | MAG        |
| CH446     | 7.61         | MAG        |
| <b>G3</b> | <b>36.44</b> | <b>MAG</b> |
| IQ1026    | 8.00         | MAG        |
| IQ351     | 6.85         | MAG        |
| IQ391     | 6.54         | MAG        |
| IQ393     | 5.20         | MAG        |
| IQ448     | 5.65         | MAG        |
| IQ595     | 6.44         | MAG        |
| IQ641     | 8.12         | MAG        |
| ME1       | 6.16         | MAG        |
| ME11      | 5.05         | MAG        |
| ME19      | 7.50         | MAG        |
| ME15      | 4.77         | MAG        |
| ME3       | 4.06         | MAG        |
| ME5       | 4.93         | MAG        |
| ME9       | 5.97         | MAG        |
| MF1       | 5.01         | MAG        |
| MF11      | 3.50         | MAG        |
| MF13      | 3.48         | MAG        |
| MF15      | 3.09         | MAG        |
| MF2       | 3.32         | MAG        |
| MF7       | 4.85         | MAG        |
| MF9       | 5.08         | MAG        |

**Supplementary Table 2. Details of the sampling.** The number of samples by species and by locality, geographic coordinates, and the acronym used for each breeding colony in this study.

| Site number | Sample species                                | Locality                 | Acronym   | Latitude | Longitude | Samples |
|-------------|-----------------------------------------------|--------------------------|-----------|----------|-----------|---------|
| 1           | <i>S.mendiculus</i>                           | El Muñeco, Isabela       | GEM       | 0°02'S   | 91°56'W   | 7       |
| 2           | <i>S.mendiculus</i>                           | CE, Isabela              | GCE       | 0°62'S   | 91°09'W   | 1       |
| 3           | <i>S.mendiculus</i>                           | Caleta Iguana, Isabela   | GCI       | 0°96'S   | 90°96'W   | 7       |
| 4           | <i>S.mendiculus</i>                           | Bartolomé, Santiago      | GBA       | 0°28'S   | 90°55'W   | 7       |
| 5           | <i>S.humboldti</i>                            | Punta San Juan           | HPSJ      | 15°36'S  | 75°19'W   | 7       |
| 6           | <i>S.humboldti</i>                            | Islote Pan de Azúcar     | HPAZ      | 26°17'S  | 70°65'W   | 8       |
| 7           | <i>S.humboldti</i>                            | Islote Chañaral          | HCHA      | 29°16'S  | 71°35'W   | 7       |
| 8           | <i>S.humboldti</i>                            | Islote Cachagua          | HCACHA    | 32°59'S  | 71°45'W   | 7       |
| 9           | <i>S.humboldti</i> and <i>S. magellanicus</i> | Islote Puñihuil          | HPU / MPU | 41°92'S  | 74°04'W   | 5 & 8   |
| 10          | <i>S. magellanicus</i>                        | Isla Magdalena           | MIM       | 52°92'S  | 70°57'W   | 7       |
| 11          | <i>S. magellanicus</i>                        | Islas Falklands/Malvinas | MFALK     | 51°69'S  | 59°53'W   | 7       |
| 12          | <i>S. magellanicus</i>                        | Monte Entrance           | MEM       | 50°08'S  | 68°22'W   | 7       |
| 13          | <i>S. magellanicus</i>                        | Isla Quiroga             | MIQ       | 47°64'S  | 65°94'W   | 7       |
| 14          | <i>S. demersus</i>                            | Isla Dassen              | ADI       | 33°42'S  | 18°06'E   | 7       |
| 15          | <i>S. demersus</i>                            | Stony Point              | ASP       | 34°68'S  | 19°45'E   | 7       |
| 16          | <i>S. demersus</i>                            | Isla Dyer                | ADYI      | 34°37'S  | 18°89'E   | 7       |

**Supplementary Table 3. SNPs datasets resulting from different genome filters used for each specific data analyses.**

| <b>Data Set</b> | <b>Number of Individuals</b> | <b>Number Species and/or population</b> | <b>Analyses</b>                                                                                                            | <b>Genome Coverage</b> | <b>Number of SNPS before filters</b> | <b>Number of SNPS after filters</b>   | <b>Filters</b>                                                                                                                                                                                                      |
|-----------------|------------------------------|-----------------------------------------|----------------------------------------------------------------------------------------------------------------------------|------------------------|--------------------------------------|---------------------------------------|---------------------------------------------------------------------------------------------------------------------------------------------------------------------------------------------------------------------|
| Data Set 1A     | 110                          | 4 species 16 population                 | Interspecific and Intraspecific Genome wide Diversity: heterozygosity, Tajim as' D, nucleotide diversity, private alleles. | 3-7X                   | 60076142                             | 202572                                | Phred score $\geq$ 30, read depth $\geq$ 3, mean read depth 5, a minimum allele count of 2, no missing data.                                                                                                        |
| Data Set 1B     | 110                          | 4 species 16 population                 | Interspecific: PCA, Phylogeny, Admixture, Introgression                                                                    | 3-7X                   |                                      | 162428                                | Phred score $\geq$ 30, read depth $\geq$ 3, mean read depth 5, a minimum allele count of 2, no missing data, LD with $r>0.5$ were removed from sliding windows of 50 SNPS and with 10 SNPS of overlap, removed CDS. |
| Data Set 2A     | 110                          | 4 species 16 population                 | Intraspecific: Admixture, EEMS                                                                                             | 3-7X                   |                                      | GAL:86433<br>HUM:109790<br>MAG:144441 | Phred score $\geq$ 30, read depth $\geq$ 3, mean read depth 5, a minimum allele count of                                                                                                                            |



|             |     |                          |                                                        |         |
|-------------|-----|--------------------------|--------------------------------------------------------|---------|
|             |     |                          |                                                        |         |
| Data Set 2B | 110 | 4 species 16 population  | Intraspecific: PCA<br>Removing gender clustering noise | 3-7X    |
| Data Set 3A | 4   | 4 species, 4 population  | Demographic inference PSMC                             | 27-30 X |
| Data Set 3B | 16  | 4 species, 16 population | Demographic inference PSMC                             | 3-7X    |
| Data Set 4  | 114 | 4 species, 16 population | Demographic inference Stairwayplot                     | 3-7X    |

|                                                 |                                                                                                                                                                                                                                                           |
|-------------------------------------------------|-----------------------------------------------------------------------------------------------------------------------------------------------------------------------------------------------------------------------------------------------------------|
| AFR: 90584                                      | 2,MAF 0,05 , LD with $r>0.5$ were removed from sliding windows of 50 SNPS and with 10 SNPS of overlap,remove CDS,no missing data                                                                                                                          |
| GAL:6489<br>HUM:17553<br>MAG:42660<br>AFR:12673 | Phred score $\geq 30$ , read depth $\geq 3$ , mean read depth 5, a minimum allele count of 2,LD with $r>0.5$ were removed from sliding windows of 50 SNPS and with 10 SNPS of overlap,remove CDS,no missing data and with highest standard desviation MAF |
|                                                 | Phred score $\geq 30$ , -d 15, -D 45 ,removed CDS.                                                                                                                                                                                                        |
|                                                 | Phred score $\geq 30$ , -d 3 -D 14 ,removed CDS.                                                                                                                                                                                                          |
| 162428                                          | Phred score $\geq 30$ , read depth $\geq 3$ , mean read depth 5, a minimum allele count of 2, no missing data, LD with $r>0.5$ were removed from sliding windows of 50 SNPS and with 10 SNPS of                                                           |

|  |  |  |  |  |
|--|--|--|--|--|
|  |  |  |  |  |
|--|--|--|--|--|

|  |                       |
|--|-----------------------|
|  | overlap, removed CDS. |
|--|-----------------------|

**Supplementary Table 4. Interspecific diversity metrics.** Diversity metrics for different banded penguin species. Indexes include nucleotide diversity ( $\pi$ ), segregate sites (S) and Tajima's D statistic, and other parameters indicating demographic events and selection pressures.

| pop              | GAL          | HUM          | MAG          | PAF          |
|------------------|--------------|--------------|--------------|--------------|
| mean_nsites      | 593797.6     | 594769.3     | 576528.2     | 590225.1     |
| mean_π           | 92994.55     | 99852.64     | 114072.03    | 107210.97    |
| mean_maf         | 0.27         | 0.22         | 0.21         | 0.26         |
| expected_π       | 115432.8     | 123411.6     | 157894       | 142229.4     |
| S                | 292828       | 359591       | 475871       | 369619       |
| harmonic_number  | 4.28         | 4.74         | 4.73         | 4.23         |
| Watterson        | 68417.76     | 75863.08     | 100606.98    | 87380.38     |
| TajimaD          | 24576.79     | 23989.56     | 13465.05     | 19830.59     |
| sd_π             | 15374.2789   | 12707.8636   | 12862.2627   | 15922.9392   |
| π_scaled         | 0.1566       | 0.1679       | 0.1979       | 0.1816       |
| π_scaled_sd      | 0.0259       | 0.0214       | 0.0223       | 27           |
| Watterson_scaled | 0.1152       | 0.1276       | 0.1745       | 148          |
| TajimaD_scaled   | 0.0414       | 0.0403       | 0.0234       | 0.0336       |
| X2               | 8828.39      | 7586.02      | 1802.14      | 4500.46      |
| pvalue           | 0            | 0            | 0            | 0            |
| sign             | **           | **           | **           | **           |
| rare_alleles     | lack_of_rare | lack_of_rare | lack_of_rare | lack_of_rare |
| demography       | contraction  | contraction  | contraction  | contraction  |



|    |    |    |    |      |      |       |      |    |      |      |    |    |    |      |    |   |        |
|----|----|----|----|------|------|-------|------|----|------|------|----|----|----|------|----|---|--------|
| 0  | 0  | 0  | 0  | 0.06 | 0.17 | 0.97  | 0    | 0  | 0    | 0    | 0  | 0  | 0  | 0    | 0  | 0 | HPAZ   |
| 0  | 0  | 0  | 0  | 0    | 0    | 0.12  | 0    | 0  | 0    | 0    | 0  | 0  | 0  | 0    | 0  | 0 | HCHA   |
| 0  | 0  | 0  | 0  | 0    | 0    | 0     | 0.36 | 0  | 0    | 0    | 0  | 0  | 0  | 0    | 0  | 0 | HCACHA |
| 0  | 0  | 0  | 0  | 0    | 0    | 0     | 0    | 0  | 0    | 0    | 0  | 0  | 0  | 0    | 0  | 0 | HPU    |
| 0  | 0  | 0  | 0  | 0    | 0    | 0     | 0    | 0  | 0.46 | 0    | 0  | 0  | 0  | 0    | 0  | 0 | MPU    |
| 0  | 0  | 0  | 0  | 0    | 0    | 0     | 0    | 0  | 0    | 0    | 0  | 0  | 0  | 0    | 0  | 0 | MIM    |
| 0  | 0  | 0  | 0  | 0    | 0    | 0     | 0    | 0  | 0    | 0    | 0  | 0  | 0  | 0    | 0  | 0 | MFALK  |
| 0  | 0  | 0  | 0  | 0    | 0    | 0     | 0    | 0  | 0    | 0    | 0  | 0  | 0  | 0    | 0  | 0 | MME    |
| 0  | 0  | 0  | 0  | 0    | 0    | 0     | 0    | 0  | 0    | 0    | 0  | 0  | 0  | 0    | 0  | 0 | MIQ    |
| 0  | 0  | 0  | 0  | 0    | 0    | 0     | 0    | 0  | 0    | 0    | 0  | 0  | 0  | 0.84 | 0  | 0 | ADI    |
| 0  | 0  | 0  | 0  | 0    | 0    | 0     | 0    | 0  | 0    | 0    | 0  | 0  | 0  | 0    | 0  | 0 | ASP    |
| 0  | 0  | 0  | 0  | 0    | 0    | 0     | 0    | 0  | 0    | 0    | 0  | 0  | 0  | 0    | 0  | 0 | ADYI   |
| GE | G  | GB | HP | HPA  | HCH  | HCACH | HP   | MP | MI   | MFAL | MM | MI | A  | AS   | AD |   |        |
| M  | CI | A  | SJ | Z    | A    | A     | U    | U  | M    | K    | E  | Q  | DI | P    | YI |   |        |

**Supplementary Table 7. Bayesass-estimated contemporaneous gene flow rates between population pairs of the four banded penguin species.** Analysis of directional gene flow revealed bidirectional and asymmetrical rates of intraspecific and current gene flow between banded penguins. Values in parenthesis are the confidence interval.

|                |                        | Migration from        |                     |                     |                        |                     |
|----------------|------------------------|-----------------------|---------------------|---------------------|------------------------|---------------------|
|                |                        | El Muñeco (GEM)       | Caleta Iguana (GCI) | Bartolomé (GBA)     |                        |                     |
| Migration into | El Muñeco (GEM)        | 0,760(0,0962)         | 0,1365(0,0701)      | 0,1106(0,0804)      |                        |                     |
|                | Caleta Iguana (GCI)    | 0,861(0,0509)         | 0,7628(0,0992)      | 0,0676(0,0472)      |                        |                     |
|                | Bartolomé (GBA)        | 0,1539(0,0786)        | 0,1007(0,0618)      | 0,8218(0,1015)      |                        |                     |
|                |                        | Migration from        |                     |                     |                        |                     |
|                |                        | Punta San Juan (HPSJ) | Pan de Azucar(HPAZ) | Chañaral(HCHA)      | Cachagua(HCACHA)       | Puñihuli(HPU)       |
| Migration into | Punta San Juan(HPSJ)   | 0,8888(0,0438)        | 0,0256(0,0236)      | 0,0283(0,0266)      | 0,0281(0,0255)         | 0,0334(0,0307)      |
|                | Pan de Azucar(HPAZ)    | 0,0275(0,0255)        | 0,8977(0,0412)      | 0,0287(0,0265)      | 0,0274(0,0253)         | 0,0336(0,0305)      |
|                | Chañaral(HCHA)         | 0,0278(0,0275)        | 0,0251(0,0228)      | 0,8876(0,0442)      | 0,0282(0,0260)         | 0,0326(0,0294)      |
|                | Cachagua(HCACHA)       | 0,0280(0,0255)        | 0,0259(0,0240)      | 0,0272(0,0250)      | 0,8898(0,0436)         | 0,0332(0,0300)      |
|                | Puñihuli(HPU)          | 0,0279(0,0259)        | 0,0258(0,0242)      | 0,0281(0,0260)      | 0,0265(0,0240)         | 0,8673(0,0500)      |
|                |                        |                       | Puñihuli(HPU)       | Isla Magdalena(MIM) | FalkLand Island(MFALK) | Monte Entrance(MME) |
| Migration into | Puñihuli(HPU)          | 0,8954(0,0418)        | 0,0274(0,0257)      | 0,0317(0,0288)      | 0,0283(0,0257)         | 0,0275(0,0249)      |
|                | Isla Magdalena(MIM)    | 0,0258(0,0243)        | 0,8891(0,0438)      | 0,0278(0,0259)      | 0,0275(0,0248)         | 0,0278(0,0255)      |
|                | Falkland Island(MFALK) | 0,0258(0,0241)        | 0,0277(0,0255)      | 0,8848(0,0452)      | 0,0281(0,0260)         | 0,0284(0,0261)      |
|                | Monte Entrance(MME)    | 0,0255(0,0238)        | 0,0282(0,0261)      | 0,0280(0,0258)      | 0,8884(0,0433)         | 0,0272(0,0245)      |
|                | Isla Quiroga(MIQ)      | 0,0276(0,0251)        | 0,0276(0,0254)      | 0,0278(0,0254)      | 0,0277(0,0252)         | 0,8894(0,0429)      |
|                |                        | Dassen Island (ADI)   | Stony Point (ASP)   | Dyer Island (ADYI)  |                        |                     |
| Migration into | Dassen Island          | 0,7778(0,1028)        | 0,0797(0,0514)      | 0,0832(0,0500)      |                        |                     |
|                | Stony Point            | 0,0545(0,0404)        | 0,7629(0,0996)      | 0,0335(0,0304)      |                        |                     |
|                | Dyer Island            | 0,1676(0,0914)        | 0,1574(0,0794)      | 0,8833(0,0543)      |                        |                     |

**Supplementary Table 8. Number of SNPs under selection.** Number of SNPs recovered by PCAdapt, GWDS and OUTFLANK in each category between banded penguin species.

|                | CDSs | Genes | mRNA | Pseudogene | Others | Total |
|----------------|------|-------|------|------------|--------|-------|
| <b>GAL-HUM</b> | 60   | 169   | 294  | 71         | 51     | 645   |
| <b>HUM-MAG</b> | 29   | 98    | 115  | 50         | 72     | 364   |
| <b>MAG-AFR</b> | 47   | 137   | 170  | 86         | 83     | 523   |

**Supplementary Table 9. Top ranked genes recovered to be under divergent selection between autosomal and sex-linked scaffolds between pairwise species of banded penguins.**

| AUTOSOMIC |                                                                                                                                                                                                                                                                                                                                                                                                                                                                                                                                                                                                                                                                                                                                                                                                                                                                                                                                                                                                                                                                                                                                                                                                                                                                                                                                                                       |
|-----------|-----------------------------------------------------------------------------------------------------------------------------------------------------------------------------------------------------------------------------------------------------------------------------------------------------------------------------------------------------------------------------------------------------------------------------------------------------------------------------------------------------------------------------------------------------------------------------------------------------------------------------------------------------------------------------------------------------------------------------------------------------------------------------------------------------------------------------------------------------------------------------------------------------------------------------------------------------------------------------------------------------------------------------------------------------------------------------------------------------------------------------------------------------------------------------------------------------------------------------------------------------------------------------------------------------------------------------------------------------------------------|
| GAL-HUM   | ABRAXAS2,ABTB2,ACAP3,ACSF2,ACSF3,ADAMT S14,ADAMTS3,ADAMTSL2,ADAMTSL3,ADCK1,A DCY10,ADGRD1,ADK,ADORA1,ADPGK,Adprh,AG PAT3,Akap8,ALK,ALPK1,ALS2CL,AMBRA1,ANK2, ANK3,ANKRD11,Ano4,ANOS1,ANTXR1,ANXA8,A OAH,APLF,ARHGAP20,Arhgap24,Arhgap25,ARH GAP40,Arhgap6,ARID4A,ARSJ,ASB1,ASB11,Asb1 3,Asb2,ASIC2,ASL,ASTN2,Asx,ATG13,ATL1,Atp1 0a,ATP6V1H,ATRN,ATXN7L1,AXIN2,B4GALNT3, BARX2,BAZ2B,BCL2L13,Bmp2k,BMPR1B,Boc,BPI ,BTBD11,BTN3A2,C4,Cacna1c,CACNA1G,Cacna1 h,CadN,CAMKK1,CAMTA1,Capn5,CASP9,CASQ2, CBS,Ccdc30,CCDC42,ccdc85c,CCNI,Cd34,CD8B,C DH13,CDH2,Cdh23,CDH4,CDS2,Celsr1,CEMIP,CE PU1,CFAP61,CFTR,CHCHD3,CHL1,CHN2,CHST11, CLCN6,CLIP2,CLNS1A,Clvs1,CNNM2,Cnrip1,CNT N3,CNTN4,Cntnap2,COL22A1,COLEC12,COLOQ,C OOQ2,CORO1C,Cox10,Cps1,crispld2,CSRNP3,Cstf 3,CTNNA2,CTPS1,CTTN1,CUBN,CUL9,Cux1,CYB5 R3,CYP2U1,CYT,CYR1,daam1,DBH,dcakd,DCPS, DDR2,DDX31,DDX42,Dennd2d,DGKZ,DHRSX,DH X37,DISC1,Dlgap2,Dmbt1,DNAH14,DOT1L,DPAG T1,Drc1,DTX2,E2F4,Ebf1,EDC4,Efcab5,EGF,egfl6, EGFL7,EIF4ENIF1,ELF1,Elk3,EMP1,EMP2,ENDOD 1,Enkd1,ENOX1,ENOX2,ENTPD8,EPAS1,EPHA10, ERBB4,ergic3,ESPL1,ESRRB,ETS1,EXOC6B,FAM1 20B,FAM76A,FAT2,FAXDC2,FBXO5,FCHSD2,Fgf1 8,FHAD1,FHIT,Fmnl2,FOXO1,FOXP4,Frmd4a,FST L4,GABRA3,GABRR2,GALNT14,Galnt17,galt,Gas 6,GBA,GBF1,GCN1,GDPD5,GLI2,Glra4,Gnai3,GP ATCH8,GPC3,Gpx1,GRAMD1B,GRIA1,Gria3,GRI D2,GRIK3,Grin1,GRIN2B,GRIP1,GRK3,GRM4,GSK |

3B,GTF2E2,GTF2I,GUCA1A,GULO,H2A1,H6PD,H  
DAC4,HDAC7,HECW1,HHIPL2,HIVEP3,Hlf,HMBO  
X1,HMGCLL1,HPGDS,HS3ST4,Hsd17b11,HSD17B  
12,HTR4,Htra1,IGDCC3,IGF2BP3,IQGAP1,Iqsec3,  
ISM1,ITGA9,ITPR1,KANSL1,Kcnd3,KCNH1,KCNH  
5,KCNH8,KCNJ3,KCNK2,KCNN3,KCNQ5,KCTD16,  
Khdrbs1,KIF26B,KIF9,Klhdc8a,Klhl12,KLHL14,Klh  
l42,KYNU,LAMA4,LAMB3,LDHA,LEF1,Lgr6,LMCD  
1,lmo1,LNP1,LRGUK,LRRC28,LRRC75A,LRRK1,lr  
wd1,LSAMP,MACF1,MAFK,Mamu,Map2k4,Map  
4k3,MAPKAP1,MARCH4,mast3,MB,MDFIC2,MD  
GA2,MED21,MED27,MEGF11,Mei1,metrnl,MFS  
D11,Mfsd14a,MGAT5B,MGLL,micu1,MID1,MKR  
N2,MN1,Mob2,MOGAT2,MORN5,MRC1,MROH  
2B,MSRA,MTHFD1L,MTHFD2L,MTHFSD,MTMR4  
,MTOR,MVB12B,MYB,mybbp1a,MYH1B,MYO1D  
,MYOG,MYSS,n4bp3,Nacc2,NAV1,NAV2,NBEA,N  
DNF,NDST4,NEK10,NEL,Nemf,NEURL1,Nfrkb,NF  
S1,NKAIN2,NLGN3,NMT2,NOL4,Nptx2,Nt5dc2,N  
TNG2,NTRK3,NUAK2,Nxn,NXPE3,OLFM4,Olf6,O  
PHN1,OR10A4,ORAI2,Otop2,Oxsr1,P4HB,Pacs1,  
Pak5,PAPLN,Pappa,PARP1,PARP14,PCDH1,Pcdh  
15,PCDH18,Pcsk2,PCSK6,PCYT2,PDIA5,Pdk3,PDL  
IM4,PDLIM5,PDZD8,PEMT,PGM3,PHACTR2,PI4K  
B,Piezo2,Pigq,PIK3AP1,PIK3C2G,PIK3R4,PINX1,P  
itpnm2,pitx3,PKD1L2,PKDCC,PKHD1,PKNOX2,PL  
EKHD1,PLG,PLXNA2,PLXNA4,PLXNB2,Plxnd1,PN  
PLA1,PODXL2,Pof1b,POLB,POLE,POLRMT,PPEF1  
,PPFIA4,PPM1H,PPP1R12B,PPP2CA,PPP6R2,PRD  
M16,PRICKLE2,PRKAG2,PRKCH,PRPF3,PRPSAP1,  
Psd,PTCHD1,Ptchd4,PTH1R,PTPDC1,PTPRA,PTP  
RT,RAB11FIP3,RADIL,Raly,Ranbp10,Rapgef5,RA  
SSF8,Rcc1l,REEP3,RELN,REPS2,REXO2,Rgs9,RHO  
F,Rhoq,RIF1,RNF14,RNF19B,RNF43,RPA2,RPL14,  
RPN1,RPS4,Rptor,RSF1,RSPO3,RTN1,Rxra,SARS,  
SBF2,SCG3,SCTR,SEC31B,SEPT11,SFXN1,SH3GL1  
,SH3PXD2B,Sh3rf2,SHC4,SIK2,SIK3,SLC18A2,SLC  
25A21,SLC25A26,Slc29a1,SLC2A13,SLC36A1,SLC  
4A11,SLC4A3,SLC4A8,Slc5a7,SLC6A1,SLC6A12,S  
LC7A5,SLC8A3,Slco2b1,SLCO3A1,SLCO4A1,Smtn  
l2,Sntg2,SNX31,SOX5,Spag4,SRGIN1,SRPK,SSPN,  
ST8SIA1,Steap3,STIM1,Stk36,STS,STX1A,STX8,ST  
YK1,SUN3,Susd4,Synpr,SYT6,TBC1D16,TBCD,tbr  
g4,TBX22,TCERG1L,TENM1,tfap2e,TGFBR2,TGS  
1,TIAM1,TIMM44,TLL2,Tm7sf3,TMC2,TMEFF2,T  
mem2,TMLHE,Tmtc2,TOM1,TP53BP2,TP73,TRA  
F7,TRPC3,Trpc5,TRPC7,TSN,TSNARE1,Tspan14,T  
SPAN15,TTC28,Ttl10,TUBA1C,Twist2,TXLNB,TY  
W1,Ube2h,UBE2Q2,Ugt1a1,Ugt2a2,Ugt8,UIMC

|         |                                                                                                                                                                                                                                                                                                                                                                                                                                                                                                                                                                                                                                                                                                                                                                                                                                                                                                                                                                                                                                                                                                                                                                                                                                                                                                                                                                                                                                                                                                                                                                                                                                                                                                  |
|---------|--------------------------------------------------------------------------------------------------------------------------------------------------------------------------------------------------------------------------------------------------------------------------------------------------------------------------------------------------------------------------------------------------------------------------------------------------------------------------------------------------------------------------------------------------------------------------------------------------------------------------------------------------------------------------------------------------------------------------------------------------------------------------------------------------------------------------------------------------------------------------------------------------------------------------------------------------------------------------------------------------------------------------------------------------------------------------------------------------------------------------------------------------------------------------------------------------------------------------------------------------------------------------------------------------------------------------------------------------------------------------------------------------------------------------------------------------------------------------------------------------------------------------------------------------------------------------------------------------------------------------------------------------------------------------------------------------|
|         | 1,ULK1,UQCRC1,USP48,UVS2,Vav2,VEGFD,Vipr1,WARS,WASF2,WDFY3,WDR93,WNK1,Wnt3,WNT3A,wnt8b,WSCD1,WWP2,Xkr6,XPO6,YTHDC1,ZDHHC12,ZDHHC15,Zdhhc4,ZDHHC8,ZDHHC9,ZFAND1,Zfyve19,ZMYND12,ZNF19,ZNF3                                                                                                                                                                                                                                                                                                                                                                                                                                                                                                                                                                                                                                                                                                                                                                                                                                                                                                                                                                                                                                                                                                                                                                                                                                                                                                                                                                                                                                                                                                        |
| HUM-MAG | Abcd4,ABCF3,ABTB2,ACAP3,ACAT2,ACSL6,ACSS2,ADAMTSL2,Adarb2,ADGRL3,AFF1,Agap1,ahcy,AKT3,ALS2CL,APRT,AQP2,ARHGEF26,ARHGEF9,ARMC9,Asb12,ASB18,asrgl1,ATP8A2,ATRN,BEGAIN,BFSP1,BMPER,C2CD2L,Cacna1h,CACNG4,CAMK1G,Capn5,Ccdc30,Ccdc85a,ccdc85c,Cct3,CDH4,CERS6,CFAP20,CFDP1,CHL1,Chmp3,CLASP1,CLEC19A,CNTNAP5,COL22A1,Col27a1,Cpne4,Cps1,CRISP2,CYP46A1,daam1,Dcx,DDX19B,DGKD,DHRS12,DHX37,DLGAP4,DOCK11,DTYMK,DUSP28,EFCAB11,EIF2AK3,EIF2B5,Elp6,EML6,EPB41,EPHB1,Epn2,Eppk1,ERBB4,ERI3,ESRP1,EXOC2,EXT1,FAM76A,FAM83H,FGFRL1,FLT1,FLT3,FOXN3,FOXO1,FOXP4,FSTL4,Galns,GALNT14,GALNT15,GALR1,GATAD2B,GLG1,GLI2,GPATCH8,GPC3,Gria3,GRIN2B,GRM1,HBS1L,HDAC4,HEATR1,HIVEP3,Hsd17b11,IGF2R,Ill1rapl2,ILKAP,INTS9,Iqj,ISM1,KCNAB1,Kcnd3,KCNK13,KCNK2,kcnk9,Kdf1,KDM3A,KIF13B,Klf15,KLF7,KLHL29,KTN1,LAMB3,LAMP3,LIMD1,LMO2,LNX2,LY75,Map2k4,MAP3K12,MAP3K4,MARCH4,Mbnl1,MDFIC2,MDGA2,MDH2,MED12L,MED20,MERTK,Mfn1,MLLT6,MN1,MOGAT2,MPRIP,MROH7,MRPL12,MT,MXRA8,MYO1D,n4bp3,NAALAD2,NAXD,Ndrg1,NDST4,Necab2,NECTIN1,NFKBID,Nipal2,NKAIN1,NOX3,NRBP1,NRP2,NTRK3,NTSR1,OGDH,Pak5,PASK,PDLIM1,PHF11,PHR,Pisd,PKHD1,PLCH1,PLD1,Plec,PLG,PLXNA2,POFUT2,POU2F3,PPM1G,PPP2R3A,PRICKLE2,PRKCA,PROC,PROSER1,Prpf6,PRR5L,PTPN11,PTPN14,PTPRA,Ptprk,RAB11FIP4,RBMS1,RCOR1,Reep1,RFLNA,Rilpl1,RYBP,SATB2,SCAMP4,SCD5,SDK1,SEC31A,SEPT6,SERGEF,SETD2,SFMBT1,SGK1,SH3PXD2B,SIK3,SLC13A3,Slc15a2,SLC22A5,SLC2A12,slc30a8,SLC35A1,Slc5a10,SLC6A14,SLC9A2,Slco2a1,smarcal1,SNAP47,SNRNP40,SNTB1,Snx17,Snx27,SPACA1,SPP2,SPRYD7,Spsb1,Srrm4,SSFA2,ST3GAL3,SUSD2,Sybu,T,Tab1,TEEA2,TECRL,TG,THAP4,TLK2,TMCO4,TMEFF2,TMEM18,Tmem2,Tnik,Tp63,TRAK2,TRAPPC9,Tspear,TTC12,TTC28,Ubash3b,UBE2G2,UBE4A,UBQLN4,Vav2,WISP1,ydj,ZMYND11 |
| MAG-AFR | A2ML1,ABCA10,ABTB2,Acot5,ada2,ADAM9,ADAMTS10,ADAMTS2,Adarb2,ADCY1,ADCY9,ADGR                                                                                                                                                                                                                                                                                                                                                                                                                                                                                                                                                                                                                                                                                                                                                                                                                                                                                                                                                                                                                                                                                                                                                                                                                                                                                                                                                                                                                                                                                                                                                                                                                     |



D1,ADGRL3,ADTRP,AFAP1L2,AFDN,AFF3,Agbl4, AHSB,AK4,AKAP12,Alkbh5,ALPK1,ALX4,Amn,A MPD1,ANK3,ANKRD26,Anks3,ANP32E,AR,ARHG AP20,ARNT2,Asb10,Ascc1,ASS1,ASTN2,Asx,Atp1 0a,B3GNTL1,BARX2,BCAS1,BCOR,BEGAIN,BEND 7,Boc,Brf1,BRPF3,BSN,BSPRY,C1S,C2CD3,C8A,C ACHD1,CACNA1G,Cacna2d4,CACNB2,CAMTA1,C APN8,Carhsp1,CASC4,CBS,CCDC25,CCDC9B,CCN D3,Cd72,Cdh22,Cdh23,Celsr1,CEMIP,CEPU1,CE RS3,CFAP47,CFH,CFTR,CHAF1B,CHGB,CIZ1,CLAS P1,CLCC1,CLCN4,CLDN11,CLIP2,Clvs1,CMIP,CNK SR2,Cntn6,CNTRL,COL6A2,COLQ,COMMD9,COP A,CORO1C,CP,Cpne4,CPSF6,Cr1l,cracr2b,CRAT,C RHR1,CSK22,CSMD1,CSMD2,Ctnna1,CTNND2,C TTN1,CUX2,Cytip1,CYP2J2,CYYR1,daam1,DAGLA ,Dedd,DEPTOR,DGKZ,DHX37,DHX38,Dhx40,DLG AP4,Dnaaf5,DNM3,Dock4,DOPEY1,DPAGT1,DPF 3,DPM1,DROSHA,DTX2,DUSP13,EDC4,EEP1,EF HC2,EHBP1,EHF,EIF4E2,ELMO1,Elp6,EML6,EPHA 10,EPHB2,Epm2a,Eppk1,EPST11,ERBB4,ERC1,ERI 3,ERP27,ESRRB,ETS1,EXOC6B,F8,FAF1,FAM13C, Fam19a1,FARP2,FBN1,FBXO16,FBXO45,Fbxw8,F CHSD2,FGFR2,FGFRL1,Fggy,FILIP1L,FIP1L1,Flcn, FN1,FNIP1,FOXO1,FRAS1,Frmd4a,FSHR,FSTL1,F STL4,GABRA3,Gabrr1,Galns,GALNT14,Galnt17,G AREM1,Gatd1,GDPD5,GJA9,GLA,GLI2,Glp1r,GLP 2R,Gmeb2,gna0,Gnal,GPC1,GPC3,GPC5,GPRC5B ,Gps1,GRB10,GREB1L,Gria4,Grin1,GRIN2B,GRK3 ,GRM1,GRM4,GRM7,GUCY2C,H1,HCN4,HDAC4, HDAC8,HEPH,HIPK2,HMGXB3,hnf4a,HORMAD2, HPSE2,Hrh2,HS3ST3B1,HS3ST4,HSPA9,Htr2c,IFN G,IGBP1,IGSF3,Ii1rapl2,INSR,IQSEC1,Iqsec3,ISM 1,ITGA9,ITGB5,Itih5,ITPKB,JAKMIP2,JARID2,JPH 2,Jup,KANSL1,KCNAB1,KCNAB2,Kcnd3,KCNH6,K CNJ6,KCNQ2,KHDRBS2,KIF13B,KIF18B,KIF26B,KI F9,KLF12,Klhl10,KLHL3,KMT2A,kpna1,KYNU,LA MA2,LARGE1,Lcp1,LDAH,LEF1,lhpp,LRP8,LRRC7 5A,LRRK1,LSAMP,M6PR,MAGI1,MAGI2,MAIP1, MAML3,MANBA,MAP10,Map2k4,MAP2K6,MAP 4K5,MARK1,mast3,Mbnl1,MBNL3,MDGA1,MED 13L,MEGF9,MET,METTTL7A,Mfsd4a,Micu2,MID1 ,MINPP1,MIPEP,MLF1,MLPH,Mob1b,MOB3C,M PP1,MSX2,MT,MTHFD1L,MVB12B,MYB,MYH1B, MYMK,MYO5A,Myo7a,n4bp3,NBEA,NDST2,NDS T4,Necab2,Necap1,Nemf,NFASC,NHSL1,Nipal2, NKAIN1,NKIRAS1,NMBR,NOL4,NPPA,NR6A1,NR G2,NRX3A,NTRK3,NUP93,Nup98,OGDH,OGFOD 1,OIT3,OLFM4,OPHN1,OSBP2,OTOA,Oxsr1,P2RX 6,Pappa,PAPSS2,Parp16,PATJ,PCDH1,Pcdh15,PC

|               |                                                                                                                                                                                                                                                                                                                                                                                                                                                                                                                                                                                                                                                                                                                                                                                                                                                                                                                                                                                                                                                                                                                                                                                                                                                            |
|---------------|------------------------------------------------------------------------------------------------------------------------------------------------------------------------------------------------------------------------------------------------------------------------------------------------------------------------------------------------------------------------------------------------------------------------------------------------------------------------------------------------------------------------------------------------------------------------------------------------------------------------------------------------------------------------------------------------------------------------------------------------------------------------------------------------------------------------------------------------------------------------------------------------------------------------------------------------------------------------------------------------------------------------------------------------------------------------------------------------------------------------------------------------------------------------------------------------------------------------------------------------------------|
|               | DHAC2,PCDHGC5,Pcsk2,PDSS2,Perm1,PID1,PIG K,Pigq,PIK3AP1,PINX1,Pisd,PITPNC1,PITPNM2,P KNOX2,PLA2G1B,PLCB1,PLEKHG1,Plxnd1,Pnpla 2,POLA1,PPFIA4,PPM1L,PPP1R12B,PRDM14,PRICKLE2,PRKAR1B,PRKCH,PRKCQ,PRKD1,Prkg1,Pr oz,PRPF4,prp5,PRRX1,PSEN1,PSTPIP1,PTPN11,PTPRF,Ptprk,PTPRM,PTPRO,PTPRR,PTPRS,PTPRU, RAB4A,RABGAP1L,RAD54B,RALGAPA2,RALYL,Ra nbp10,RARS,RASA3,RBBP7,RBM19,Reep1,RETR EG3,RFWD3,RGS4,Rgs9,RIN3,Rnpepl1,ROS1,RP AP1,Rptor,RRAGC,Rrbp1,Rxra,SAFB,SAMD11,SA RDH,SCNN1B,SCRN1,SDK1,SEC31A,SEMA5B,SER PINA10,SERPINE2,SETD2,SFMBT1,SFRP1,Sh3rf2, Shank3,SLC1A7,Slc22a18,SLC24A3,Slc25a22,slc2 5a25,SLC26A4,SLC2A12,SLC2A13,slc30a8,SLC39 A11,SLC39A12,SLC4A4,SLC5A11,SLC5A12,SLC6A 1,SLC6A14,SLC8A1,Slco2a1,smarcal1,SMARCC1, SMYD1,SND1,Snx27,Spsb3,SPSB4,SPTBN1,SRD5 A2,ST3GAL3,STAMBPL1,STIM1,STIMATE,STK32C ,STX1A,SUSD2,SUSD5,Sv2b,SYN3,SYT6,T,TADA1, TAF1A,TAF7,TBCD,TCEA2,TCEANC2,tcf3,TEAD4, Tedc1,TENM4,tfp2e,THSD7B,THUMPD2,TIRAP, Tkt,Tmc3,Tmcc1,TMEFF2,Tmem47,TMEM59,Tm ie,Tmtc1,TNNI2,TNNI3K,TP73,TPCN1,Tpk1,TRAB D,Trabd2b,TRAF3,TRAF3IP2,TRAK2,TRHDE,TRIM 29,TRIM66,TSNARE1,TSPAN15,TSPAN5,TTC28,T ubgcp2,UMAD1,URB1,USP28,USP40,VASH2,VA T1L,Vav2,VDHAP,VPS33A,WASF2,WDR82,WISP 1,WISP3,WRB,WRN,WSCD2,XPR1,XYL1,YPEL2, Zbtb46,ZNF3 |
| SEX-linked ZZ |                                                                                                                                                                                                                                                                                                                                                                                                                                                                                                                                                                                                                                                                                                                                                                                                                                                                                                                                                                                                                                                                                                                                                                                                                                                            |
| GAL-HUM       | <i>PLCXD3, PARP8, POLI, DCC, Mapk4, CNTFR</i>                                                                                                                                                                                                                                                                                                                                                                                                                                                                                                                                                                                                                                                                                                                                                                                                                                                                                                                                                                                                                                                                                                                                                                                                              |
| HUM-MAG       | <i>ANKDD1B, TCF4, DCC, Mex3c, CTIF, PIAS2, ST8SIA5, LOXHD1, SIGLEC15, SETBP1, CELF4, Dnai1, DCTN3, CCBE1, ADAMTS12</i>                                                                                                                                                                                                                                                                                                                                                                                                                                                                                                                                                                                                                                                                                                                                                                                                                                                                                                                                                                                                                                                                                                                                     |
| MAG-AFR       | <i>PARP8, Map1b, ANKDD1B, DMGDH, CMYA5, Thbs4, TCF4, RAB27B, DCC, Mex3c, CTIF, ZBTB7C, katnal2, PSTPIP2, SETBP1, celf4, nol6, DCTN3, Atp8b2, CCBE1, C1QTNF3, LIFR</i>                                                                                                                                                                                                                                                                                                                                                                                                                                                                                                                                                                                                                                                                                                                                                                                                                                                                                                                                                                                                                                                                                      |
| SEX-linked ZW |                                                                                                                                                                                                                                                                                                                                                                                                                                                                                                                                                                                                                                                                                                                                                                                                                                                                                                                                                                                                                                                                                                                                                                                                                                                            |
| GAL-HUM       | <i>FBN2, FSD1L, PLCXD3, PARP8, ST8SIA3, POLI, DCC, Mex3c, Mapk4, CNTFR, ADAMTS12</i>                                                                                                                                                                                                                                                                                                                                                                                                                                                                                                                                                                                                                                                                                                                                                                                                                                                                                                                                                                                                                                                                                                                                                                       |
| HUM-MAG       | <i>TCF4, DCC, Mex3c, MYO5B, CTIF, katnal2, PIAS2, ST8SIA5, LOXHD1, SIGLEC15, SETBP1, CELF4</i>                                                                                                                                                                                                                                                                                                                                                                                                                                                                                                                                                                                                                                                                                                                                                                                                                                                                                                                                                                                                                                                                                                                                                             |

|         |                                                                                                    |
|---------|----------------------------------------------------------------------------------------------------|
| MAG-AFR | <i>FBN2, FSD1L, PARP8, DMGDH, TCF4, RAB27B, DCC, Mex3c, CTIF, ZBTB7C, katnal2, PSTPIP2, SETBP1</i> |
|---------|----------------------------------------------------------------------------------------------------|

**Supplementary Table 10. Functional Annotation of Genes in Biological Processes.** Genes categorized by their functional annotations according to Gene Ontology (GO) terms. The categories include Learning/Memory, Response to Stimulus, Muscle Contraction/Capacity, Osmoregulation/ION Transport, Hypoxia/ROS, and Starvation/Autophagy, each associated with specific biological functions in banded penguin species.

| Category                     | Gene Ontology (GO)                                                                                                                                                                                                                                                                                                     |
|------------------------------|------------------------------------------------------------------------------------------------------------------------------------------------------------------------------------------------------------------------------------------------------------------------------------------------------------------------|
| Learning/Memory              | GO:0021587, GO:0035176, GO:0008306, GO:0007612, GO:0007613, GO:0007611, GO:0007610, GO:0009612, GO:0009605, GO:0033554, GO:0050896, GO:0031929, GO:0086004, GO:0042594, GO:0051146, GO:0090257, GO:0006874, GO:0072507, GO:0070588, GO:0006816, GO:0055065, GO:0034765, GO:0034220, GO:0006873, GO:0050801, GO:0006812 |
| Response to stimulus         | GO:0033554, GO:0031929                                                                                                                                                                                                                                                                                                 |
| Muscle contraction/capacity  | GO:0031929, GO:0086004, GO:0042594, GO:0051146, GO:0090257, GO:0034765, GO:0034220                                                                                                                                                                                                                                     |
| Osmoregulation/ION transport | GO:0006874, GO:0072507, GO:0070588, GO:0006816, GO:0055065, GO:0034765, GO:0034220, GO:0006873, GO:0050801, GO:0006812                                                                                                                                                                                                 |
| HYPOXIA/ROS                  | GO:0071456, GO:0071453, GO:0033554, GO:1903522                                                                                                                                                                                                                                                                         |
| Starvation/autophagy         | GO:0031669, GO:0009267, GO:0043502                                                                                                                                                                                                                                                                                     |

**Supplementary Table 11. Phenotypic associations related with body size difference between Galapagos and Humboldt penguin found under potential selection pressures.** Phenotypic traits identified through functional enrichment analysis and their corresponding adjusted p-values.

| <b>Phenotype</b> | <b>Phenotype ID</b> | <b>Adjusted p-value</b> |
|------------------|---------------------|-------------------------|
| Growth delay     | HP:0001510          | $6.122 \times 10^{-20}$ |
| Microcephaly     | HP:0000252          | $6.530 \times 10^{-13}$ |
| Short digit      | HP:0011927          | $1.139 \times 10^{-7}$  |
| Hypogonadism     | HP:0000135          | $8.446 \times 10^{-6}$  |
| Short nose       | HP:0003196          | $1.493 \times 10^{-4}$  |
| Hypothyroidism   | HP:0000821          | $1.660 \times 10^{-3}$  |
| Short toe        | HP:0001831          | $4.237 \times 10^{-3}$  |
| Short finger     | HP:0009381          | $2.111 \times 10^{-2}$  |
| Short neck       | HP:0001792          | $3.215 \times 10^{-2}$  |
| Small nail       | HP:0001792          | $3.215 \times 10^{-2}$  |

**Supplementary Table 12. Rapidly evolving gene families among little blue and banded penguins.**

| <b>GO ID</b> | <b>Event</b> | <b>Namespace</b>   | <b>Name (Child term)</b>          | <b>Count p-value</b> | <b>p-value</b> |
|--------------|--------------|--------------------|-----------------------------------|----------------------|----------------|
| GO:0000920   | Expansion    | biological_process | cell separation after cytokinesis | 9                    | 8.60E-19       |
| GO:0042803   | Expansion    | molecular_function | protein homodimerization activity | 8                    | 2.73E-13       |
| GO:0000278   | Expansion    | biological_process | mitotic cell cycle                | 8                    | 2.25E-12       |
| GO:0003774   | Expansion    | molecular_function | motor activity                    | 7                    | 1.53E-08       |
| GO:0030182   | Expansion    | biological_process | neuron differentiation            | 3                    | 5.86E-05       |
| GO:0001764   | Expansion    | biological_process | neuron migration                  | 3                    | 1.44E-04       |
| GO:0051225   | Expansion    | biological_process | spindle assembly                  | 3                    | 8.20E-04       |
| GO:0043087   | Expansion    | biological_process | regulation of GTPase activity     | 2                    | 1.14E-02       |
| GO:0007283   | Expansion    | biological_process | spermatogenesis                   | 5                    | 3.89E-02       |

**Supplementary Table 13. Rapidly evolving gene families between Galápagos and Humboldt penguins**

| GO ID      | Event     | Namespace          | Name                              | Count | p-value  |
|------------|-----------|--------------------|-----------------------------------|-------|----------|
| GO:0000920 | Expansion | biological_process | cell separation after cytokinesis | 9     | 8.60E-19 |
| GO:0042803 | Expansion | molecular_function | protein homodimerization activity | 8     | 2.73E-13 |
| GO:0000278 | Expansion | biological_process | mitotic cell cycle                | 8     | 2.25E-12 |
| GO:0003774 | Expansion | molecular_function | motor activity                    | 7     | 1.53E-08 |
| GO:0007283 | Expansion | biological_process | spermatogenesis                   | 5     | 3.89E-02 |
| GO:0030182 | Expansion | biological_process | neuron differentiation            | 3     | 5.86E-05 |
| GO:0001764 | Expansion | biological_process | neuron migration                  | 3     | 1.44E-04 |
| GO:0051225 | Expansion | biological_process | spindle assembly                  | 3     | 8.20E-04 |
| GO:0043087 | Expansion | biological_process | regulation of GTPase activity     | 2     | 1.14E-02 |

**Supplementary Table 14. Rapidly evolving gene families between Magellanic and African penguins.**

| GO ID      | Event     | Namespace          | Name                                   | Count | p-value  |
|------------|-----------|--------------------|----------------------------------------|-------|----------|
| GO:0005200 | Expansion | molecular_function | structural constituent of cytoskeleton | 69    | 0.00E+00 |
| GO:0007608 | Expansion | biological_process | sensory perception of smell            | 10    | 0.00E+00 |
| GO:0005198 | Expansion | molecular_function | structural molecule activity           | 9     | 0.00E+00 |
| GO:0004984 | Expansion | molecular_function | olfactory receptor activity            | 9     | 0.00E+00 |
| GO:0007411 | Expansion | biological_process | axon guidance                          | 9     | 0.00E+00 |
| GO:0007283 | Expansion | biological_process | spermatogenesis                        | 6     | 3.57E-04 |
| GO:0043587 | Expansion | biological_process | tongue morphogenesis                   | 4     | 2.23E-08 |

**Supplementary Table 15. Rapidly evolving gene families in Galapagos penguin.**

| Galápagos  |           |                    |                                                                      |       |          |
|------------|-----------|--------------------|----------------------------------------------------------------------|-------|----------|
| GO ID      | Event     | Namespace          | Name (Child term)                                                    | Count | p-value  |
| GO:0006814 | Expansion | biological_process | sodium ion transport                                                 | 66    | 9.14E-22 |
| GO:0007165 | Expansion | biological_process | signal transduction                                                  | 65    | 1.21E-11 |
| GO:0016055 | Expansion | biological_process | Wnt signaling pathway                                                | 48    | 2.21E-02 |
| GO:0006511 | Expansion | biological_process | ubiquitin-dependent protein catabolic process                        | 43    | 1.05E-06 |
| GO:0016021 | Expansion | cellular_component | integral component of membrane                                       | 38    | 3.15E-24 |
| GO:0007283 | Expansion | biological_process | spermatogenesis                                                      | 36    | 3.00E-04 |
| GO:0046872 | Expansion | molecular_function | metal ion binding                                                    | 30    | 1.24E-07 |
| GO:0061038 | Expansion | biological_process | uterus morphogenesis                                                 | 28    | 7.7E-32  |
| GO:0044826 | Expansion | biological_process | viral genome integration into host DNA                               | 28    | 2.34E-10 |
| GO:0015031 | Expansion | biological_process | protein transport                                                    | 26    | 4.73E-05 |
| GO:0008380 | Expansion | biological_process | RNA splicing                                                         | 23    | 1.83E-02 |
| GO:0051932 | Expansion | biological_process | synaptic transmission, GABAergic                                     | 22    | 2.73E-08 |
| GO:0006412 | Expansion | biological_process | translation                                                          | 22    | 1.10E-03 |
| GO:0016020 | Expansion | cellular_component | membrane                                                             | 21    | 2.68E-05 |
| GO:0045944 | Expansion | biological_process | positive regulation of transcription from RNA polymerase II promoter | 18    | 1.34E-04 |
| GO:0006355 | Expansion | biological_process | regulation of transcription, DNA-templated                           | 17    | 7.99E-14 |
| GO:0016032 | Expansion | biological_process | viral process                                                        | 16    | 3.59E-12 |
| GO:0002250 | Expansion | biological_process | adaptive immune response                                             | 16    | 2.69E-11 |
| GO:0016042 | Expansion | biological_process | lipid catabolic process                                              | 16    | 1.55E-02 |
| GO:0045747 | Expansion | biological_process | positive regulation of Notch signaling pathway                       | 15    | 3.12E-13 |

|            |           |                    |                                                                                                 |    |          |
|------------|-----------|--------------------|-------------------------------------------------------------------------------------------------|----|----------|
| GO:0008270 | Expansion | molecular_function | zinc ion binding                                                                                | 15 | 4.91E-03 |
| GO:0007601 | Expansion | biological_process | visual perception                                                                               | 14 | 5.71E-13 |
| GO:0060676 | Expansion | biological_process | ureteric bud formation                                                                          | 14 | 3.02E-12 |
| GO:0016529 | Expansion | cellular_component | sarcoplasmic reticulum                                                                          | 14 | 3.02E-12 |
| GO:0043488 | Expansion | biological_process | regulation of mRNA stability                                                                    | 13 | 2.73E-05 |
| GO:0006829 | Expansion | biological_process | zinc II ion transport                                                                           | 13 | 2.87E-04 |
| GO:0003723 | Expansion | molecular_function | RNA binding                                                                                     | 13 | 1.49E-03 |
| GO:0007018 | Expansion | biological_process | microtubule-based movement                                                                      | 13 | 2.73E-02 |
| GO:0004111 | Expansion | molecular_function | creatine kinase activity                                                                        | 12 | 6.43E-14 |
| GO:0010142 | Expansion | biological_process | farnesyl diphosphate biosynthetic process, mevalonate pathway                                   | 12 | 6.43E-14 |
| GO:0016192 | Expansion | biological_process | vesicle-mediated transport                                                                      | 12 | 2.53E-10 |
| GO:0006998 | Expansion | biological_process | nuclear envelope organization                                                                   | 12 | 1.85E-08 |
| GO:0016567 | Expansion | biological_process | protein ubiquitination                                                                          | 12 | 1.81E-07 |
| GO:0042803 | Expansion | molecular_function | protein homodimerization activity                                                               | 12 | 6.07E-04 |
| GO:0043129 | Expansion | biological_process | surfactant homeostasis                                                                          | 11 | 1.29E-07 |
| GO:0051225 | Expansion | biological_process | spindle assembly                                                                                | 11 | 7.15E-03 |
| GO:0050852 | Expansion | biological_process | T cell receptor signaling pathway                                                               | 11 | 1.08E-02 |
| GO:0001916 | Expansion | biological_process | positive regulation of T cell mediated cytotoxicity                                             | 10 | 2.10E-08 |
| GO:0007015 | Expansion | biological_process | actin filament organization                                                                     | 10 | 2.10E-08 |
| GO:0061408 | Expansion | biological_process | positive regulation of transcription from RNA polymerase II promoter in response to heat stress | 10 | 2.21E-05 |
| GO:0005886 | Expansion | cellular_component | plasma membrane                                                                                 | 10 | 2.33E-03 |
| GO:0033260 | Expansion | biological_process | nuclear DNA replication                                                                         | 9  | 1.34E-10 |
| GO:0006885 | Expansion | biological_process | regulation of pH                                                                                | 9  | 1.78E-07 |
| GO:0039702 | Expansion | biological_process | viral budding via host ESCRT complex                                                            | 9  | 7.34E-05 |
| GO:0000920 | Expansion | biological_process | cell separation after cytokinesis                                                               | 9  | 1.03E-04 |
| GO:0042273 | Expansion | biological_process | ribosomal large subunit biogenesis                                                              | 9  | 1.74E-02 |



|            |           |                    |                                                                                            |   |          |
|------------|-----------|--------------------|--------------------------------------------------------------------------------------------|---|----------|
| GO:0005814 | Expansion | cellular_component | centriole                                                                                  | 8 | 1.69E-09 |
| GO:0043048 | Expansion | biological_process | dolichyl monophosphate biosynthetic process                                                | 8 | 1.69E-09 |
| GO:0002286 | Expansion | biological_process | T cell activation involved in immune response                                              | 8 | 1.44E-06 |
| GO:0030018 | Expansion | cellular_component | Z disc                                                                                     | 8 | 1.44E-06 |
| GO:0006703 | Expansion | biological_process | estrogen biosynthetic process                                                              | 8 | 3.11E-06 |
| GO:0004386 | Expansion | molecular_function | helicase activity                                                                          | 8 | 3.25E-05 |
| GO:0051693 | Expansion | biological_process | actin filament capping                                                                     | 8 | 3.25E-05 |
| GO:0044782 | Expansion | biological_process | cilium organization                                                                        | 8 | 5.18E-05 |
| GO:0002009 | Expansion | biological_process | morphogenesis of an epithelium                                                             | 8 | 7.94E-05 |
| GO:0035774 | Expansion | biological_process | positive regulation of insulin secretion involved in cellular response to glucose stimulus | 8 | 1.18E-04 |
| GO:0007264 | Expansion | biological_process | small GTPase mediated signal transduction                                                  | 8 | 2.32E-04 |
| GO:0014037 | Expansion | biological_process | Schwann cell differentiation                                                               | 8 | 2.41E-04 |
| GO:0006486 | Expansion | biological_process | protein glycosylation                                                                      | 8 | 2.77E-04 |
| GO:0051897 | Expansion | biological_process | positive regulation of protein kinase B signaling                                          | 8 | 4.51E-04 |
| GO:0010469 | Expansion | biological_process | regulation of receptor activity                                                            | 8 | 6.00E-04 |
| GO:0046983 | Expansion | molecular_function | protein dimerization activity                                                              | 8 | 6.00E-04 |
| GO:0070207 | Expansion | biological_process | protein homotrimerization                                                                  | 8 | 2.46E-03 |
| GO:0007169 | Expansion | biological_process | transmembrane receptor protein tyrosine kinase signaling pathway                           | 8 | 6.15E-03 |
| GO:0010212 | Expansion | biological_process | response to ionizing radiation                                                             | 8 | 9.27E-03 |
| GO:0002576 | Expansion | biological_process | platelet degranulation                                                                     | 8 | 2.12E-02 |
| GO:0015718 | Expansion | biological_process | monocarboxylic acid transport                                                              | 8 | 2.12E-02 |
| GO:0034632 | Expansion | molecular_function | retinol transporter activity                                                               | 7 | 2.14E-08 |
| GO:0060819 | Expansion | biological_process | inactivation of X chromosome by genetic imprinting                                         | 7 | 2.14E-08 |
| GO:0097094 | Expansion | biological_process | craniofacial suture morphogenesis                                                          | 7 | 2.14E-08 |
| GO:0035498 | Expansion | biological_process | carnosine metabolic process                                                                | 7 | 2.14E-08 |
| GO:0007276 | Expansion | biological_process | gamete generation                                                                          | 7 | 2.14E-08 |

|            |           |                    |                                                                                 |   |          |
|------------|-----------|--------------------|---------------------------------------------------------------------------------|---|----------|
| GO:0006777 | Expansion | biological_process | Mo-molybdopterin cofactor biosynthetic process                                  | 7 | 1.12E-05 |
| GO:0060261 | Expansion | biological_process | positive regulation of transcription initiation from RNA polymerase II promoter | 7 | 1.12E-05 |
| GO:0045773 | Expansion | biological_process | positive regulation of axon extension                                           | 7 | 1.12E-05 |
| GO:0048845 | Expansion | biological_process | venous blood vessel morphogenesis                                               | 7 | 1.82E-04 |
| GO:0055012 | Expansion | biological_process | ventricular cardiac muscle cell differentiation                                 | 7 | 1.82E-04 |
| GO:0051382 | Expansion | biological_process | kinetochore assembly                                                            | 7 | 1.82E-04 |
| GO:0006471 | Expansion | biological_process | protein ADP-ribosylation                                                        | 7 | 2.74E-04 |
| GO:0072593 | Expansion | biological_process | reactive oxygen species metabolic process                                       | 7 | 4.00E-04 |
| GO:0019731 | Expansion | biological_process | antibacterial humoral response                                                  | 7 | 5.67E-04 |
| GO:0097428 | Expansion | biological_process | protein maturation by iron-sulfur cluster transfer                              | 7 | 9.09E-03 |
| GO:1901796 | Expansion | biological_process | regulation of signal transduction by p53 class mediator                         | 7 | 1.23E-02 |
| GO:0018105 | Expansion | biological_process | peptidyl-serine phosphorylation                                                 | 7 | 1.42E-02 |
| GO:0001659 | Expansion | biological_process | temperature homeostasis                                                         | 7 | 1.84E-02 |
| GO:0032012 | Expansion | biological_process | regulation of ARF protein signal transduction                                   | 7 | 2.32E-02 |
| GO:0043627 | Expansion | biological_process | response to estrogen                                                            | 7 | 2.32E-02 |
| GO:0001944 | Expansion | biological_process | vasculature development                                                         | 7 | 2.32E-02 |
| GO:0006479 | Expansion | biological_process | protein methylation                                                             | 7 | 2.59E-02 |
| GO:0042182 | Expansion | biological_process | ketone catabolic process                                                        | 6 | 2.69E-07 |
| GO:0006741 | Expansion | biological_process | NADP biosynthetic process                                                       | 6 | 2.69E-07 |
| GO:0060078 | Expansion | biological_process | regulation of postsynaptic membrane potential                                   | 6 | 2.69E-07 |
| GO:0018401 | Expansion | biological_process | peptidyl-proline hydroxylation to 4-hydroxy-L-proline                           | 6 | 8.22E-05 |
| GO:0046040 | Expansion | biological_process | IMP metabolic process                                                           | 6 | 1.51E-04 |
| GO:0048729 | Expansion | biological_process | tissue morphogenesis                                                            | 6 | 9.42E-04 |
| GO:0072573 | Expansion | biological_process | tolerance induction to lipopolysaccharide                                       | 6 | 9.42E-04 |
| GO:0035902 | Expansion | biological_process | response to immobilization stress                                               | 6 | 9.42E-04 |
| GO:0018095 | Expansion | biological_process | protein polyglutamylation                                                       | 6 | 3.27E-03 |

|            |           |                    |                                                                 |   |          |
|------------|-----------|--------------------|-----------------------------------------------------------------|---|----------|
| GO:0031098 | Expansion | biological_process | stress-activated protein kinase signaling cascade               | 6 | 3.56E-03 |
| GO:0051260 | Expansion | biological_process | protein homooligomerization                                     | 6 | 7.08E-03 |
| GO:0000921 | Expansion | biological_process | septin ring assembly                                            | 6 | 9.86E-03 |
| GO:0002040 | Expansion | biological_process | sprouting angiogenesis                                          | 6 | 1.18E-02 |
| GO:0006636 | Expansion | biological_process | unsaturated fatty acid biosynthetic process                     | 6 | 2.18E-02 |
| GO:0006805 | Expansion | biological_process | xenobiotic metabolic process                                    | 6 | 2.26E-02 |
| GO:0006357 | Expansion | biological_process | regulation of transcription from RNA polymerase II promoter     | 5 | 1.02E-17 |
| GO:0045893 | Expansion | biological_process | positive regulation of transcription, DNA-templated             | 5 | 2.08E-06 |
| GO:0010466 | Expansion | biological_process | negative regulation of peptidase activity                       | 5 | 3.38E-06 |
| GO:0006975 | Expansion | biological_process | DNA damage induced protein phosphorylation                      | 5 | 3.38E-06 |
| GO:0036111 | Expansion | biological_process | very long-chain fatty-acyl-CoA metabolic process                | 5 | 3.38E-06 |
| GO:0021758 | Expansion | biological_process | putamen development                                             | 5 | 3.38E-06 |
| GO:0051639 | Expansion | biological_process | actin filament network formation                                | 5 | 3.38E-06 |
| GO:0010863 | Expansion | biological_process | positive regulation of phospholipase C activity                 | 5 | 3.38E-06 |
| GO:0060158 | Expansion | biological_process | phospholipase C-activating dopamine receptor signaling pathway  | 5 | 3.38E-06 |
| GO:0010814 | Expansion | biological_process | substance P catabolic process                                   | 5 | 3.38E-06 |
| GO:0055085 | Expansion | biological_process | transmembrane transport                                         | 5 | 3.04E-05 |
| GO:0035282 | Expansion | biological_process | segmentation                                                    | 5 | 6.01E-05 |
| GO:0006979 | Expansion | biological_process | response to oxidative stress                                    | 5 | 4.55E-04 |
| GO:0051493 | Expansion | biological_process | regulation of cytoskeleton organization                         | 5 | 5.62E-04 |
| GO:0050714 | Expansion | biological_process | positive regulation of protein secretion                        | 5 | 5.62E-04 |
| GO:0004693 | Expansion | molecular_function | cyclin-dependent protein serine/threonine kinase activity       | 5 | 5.62E-04 |
| GO:1902896 | Expansion | biological_process | terminal web assembly                                           | 5 | 5.62E-04 |
| GO:0021559 | Expansion | biological_process | trigeminal nerve development                                    | 5 | 9.48E-04 |
| GO:0021644 | Expansion | biological_process | vagus nerve morphogenesis                                       | 5 | 9.48E-04 |
| GO:0007156 | Expansion | biological_process | homophilic cell adhesion via plasma membrane adhesion molecules | 5 | 1.08E-03 |
| GO:0001504 | Expansion | biological_process | neurotransmitter uptake                                         | 5 | 3.20E-03 |

|            |           |                    |                                                          |   |          |
|------------|-----------|--------------------|----------------------------------------------------------|---|----------|
| GO:0043022 | Expansion | molecular_function | ribosome binding                                         | 5 | 4.42E-03 |
| GO:0005978 | Expansion | biological_process | glycogen biosynthetic process                            | 5 | 4.42E-03 |
| GO:0042147 | Expansion | biological_process | retrograde transport, endosome to Golgi                  | 5 | 6.17E-03 |
| GO:0006813 | Expansion | biological_process | potassium ion transport                                  | 5 | 7.71E-03 |
| GO:0045202 | Expansion | cellular_component | synapse                                                  | 5 | 1.23E-02 |
| GO:0007517 | Expansion | biological_process | muscle organ development                                 | 5 | 1.50E-02 |
| GO:0034097 | Expansion | biological_process | response to cytokine                                     | 5 | 2.54E-02 |
| GO:0016358 | Expansion | biological_process | dendrite development                                     | 4 | 4.23E-05 |
| GO:0060048 | Expansion | biological_process | cardiac muscle contraction                               | 4 | 4.23E-05 |
| GO:0016486 | Expansion | biological_process | peptide hormone processing                               | 4 | 4.23E-05 |
| GO:0030223 | Expansion | biological_process | neutrophil differentiation                               | 4 | 4.23E-05 |
| GO:0006449 | Expansion | biological_process | regulation of translational termination                  | 4 | 4.23E-05 |
| GO:0019511 | Expansion | biological_process | peptidyl-proline hydroxylation                           | 4 | 4.23E-05 |
| GO:0060322 | Expansion | biological_process | head development                                         | 4 | 4.23E-05 |
| GO:0007399 | Expansion | biological_process | nervous system development                               | 4 | 5.10E-04 |
| GO:0008299 | Expansion | biological_process | isoprenoid biosynthetic process                          | 4 | 3.51E-03 |
| GO:0046677 | Expansion | biological_process | response to antibiotic                                   | 4 | 1.07E-02 |
| GO:0051496 | Expansion | biological_process | positive regulation of stress fiber assembly             | 4 | 1.84E-02 |
| GO:0007605 | Expansion | biological_process | sensory perception of sound                              | 3 | 1.69E-07 |
| GO:0008284 | Expansion | biological_process | positive regulation of cell proliferation                | 3 | 1.52E-02 |
| GO:0007608 | Expansion | biological_process | sensory perception of smell                              | 2 | 2.51E-06 |
| GO:0006367 | Expansion | biological_process | transcription initiation from RNA polymerase II promoter | 2 | 5.13E-06 |
| GO:0009617 | Expansion | biological_process | response to bacterium                                    | 2 | 1.22E-05 |
| GO:0072560 | Expansion | biological_process | type B pancreatic cell maturation                        | 2 | 6.54E-03 |
| GO:0007603 | Expansion | biological_process | phototransduction, visible light                         | 2 | 6.54E-03 |
| GO:0007626 | Expansion | biological_process | locomotory behavior                                      | 2 | 1.81E-02 |

**Supplementary Table 16.** Rapidly evolving gene families in Humboldt penguin.

| <b>Humboldt</b> |              |                    |                                                             |                      |                |
|-----------------|--------------|--------------------|-------------------------------------------------------------|----------------------|----------------|
| <b>GO ID</b>    | <b>Event</b> | <b>Namespace</b>   | <b>Name (Child term)</b>                                    | <b>Count p-value</b> | <b>p-value</b> |
| GO:0006334      | Expansion    | biological_process | nucleosome assembly                                         | 92                   | 1.44E-77       |
| GO:0046872      | Expansion    | molecular_function | metal ion binding                                           | 52                   | 2.69E-03       |
| GO:0007165      | Expansion    | biological_process | signal transduction                                         | 51                   | 1.83E-23       |
| GO:0006511      | Expansion    | biological_process | ubiquitin-dependent protein catabolic process               | 36                   | 5.06E-12       |
| GO:0006325      | Expansion    | biological_process | chromatin organization                                      | 34                   | 2.90E-15       |
| GO:0016032      | Expansion    | biological_process | viral process                                               | 31                   | 5.06E-07       |
| GO:0007601      | Expansion    | biological_process | visual perception                                           | 28                   | 8.96E-08       |
| GO:0006357      | Expansion    | biological_process | regulation of transcription from RNA polymerase II promoter | 25                   | 6.15E-07       |
| GO:0003774      | Expansion    | molecular_function | motor activity                                              | 25                   | 3.33E-05       |
| GO:0007525      | Expansion    | biological_process | somatic muscle development                                  | 23                   | 7.31E-14       |
| GO:0000278      | Expansion    | biological_process | mitotic cell cycle                                          | 21                   | 1.77E-07       |
| GO:0016055      | Expansion    | biological_process | Wnt signaling pathway                                       | 19                   | 9.80E-14       |
| GO:0006412      | Expansion    | biological_process | translation                                                 | 19                   | 9.73E-06       |
| GO:0060412      | Expansion    | biological_process | ventricular septum morphogenesis                            | 18                   | 8.02E-05       |
| GO:0006366      | Expansion    | biological_process | transcription from RNA polymerase II promoter               | 18                   | 2.06E-03       |
| GO:0006904      | Expansion    | biological_process | vesicle docking involved in exocytosis                      | 17                   | 2.80E-03       |
| GO:0007283      | Expansion    | biological_process | spermatogenesis                                             | 16                   | 3.23E-15       |
| GO:0015031      | Expansion    | biological_process | protein transport                                           | 16                   | 2.64E-11       |
| GO:0050776      | Expansion    | biological_process | regulation of immune response                               | 16                   | 1.09E-03       |
| GO:0008270      | Expansion    | molecular_function | zinc ion binding                                            | 16                   | 2.05E-03       |
| GO:0043565      | Expansion    | molecular_function | sequence-specific DNA binding                               | 14                   | 6.27E-07       |
| GO:0004849      | Expansion    | molecular_function | uridine kinase activity                                     | 12                   | 2.41E-13       |

|            |           |                    |                                                                                     |    |          |
|------------|-----------|--------------------|-------------------------------------------------------------------------------------|----|----------|
| GO:0016192 | Expansion | biological_process | vesicle-mediated transport                                                          | 12 | 2.56E-12 |
| GO:0030100 | Expansion | biological_process | regulation of endocytosis                                                           | 12 | 1.75E-03 |
| GO:0006635 | Expansion | biological_process | fatty acid beta-oxidation                                                           | 11 | 5.54E-04 |
| GO:0007275 | Expansion | biological_process | multicellular organismal development                                                | 11 | 3.00E-03 |
| GO:0071625 | Expansion | biological_process | vocalization behavior                                                               | 10 | 1.77E-02 |
| GO:0061097 | Expansion | biological_process | regulation of protein tyrosine kinase activity                                      | 9  | 3.58E-10 |
| GO:0005509 | Expansion | molecular_function | calcium ion binding                                                                 | 9  | 5.52E-03 |
| GO:0051259 | Expansion | biological_process | protein oligomerization                                                             | 9  | 1.81E-02 |
| GO:0045892 | Expansion | biological_process | negative regulation of transcription, DNA-templated                                 | 8  | 2.23E-03 |
| GO:0007399 | Expansion | biological_process | nervous system development                                                          | 8  | 7.91E-03 |
| GO:0006468 | Expansion | biological_process | protein phosphorylation                                                             | 8  | 1.13E-02 |
| GO:0016021 | Expansion | cellular_component | integral component of membrane                                                      | 7  | 8.40E-62 |
| GO:0042450 | Expansion | biological_process | arginine biosynthetic process via ornithine                                         | 7  | 4.59E-08 |
| GO:0007140 | Expansion | biological_process | male meiosis                                                                        | 7  | 4.59E-08 |
| GO:0045893 | Expansion | biological_process | positive regulation of transcription, DNA-templated                                 | 7  | 4.01E-06 |
| GO:0035360 | Expansion | biological_process | positive regulation of peroxisome proliferator activated receptor signaling pathway | 7  | 2.29E-05 |
| GO:0006351 | Expansion | biological_process | transcription, DNA-templated                                                        | 7  | 3.40E-05 |
| GO:0070904 | Expansion | biological_process | transepithelial L-ascorbic acid transport                                           | 7  | 1.41E-04 |
| GO:0007179 | Expansion | biological_process | transforming growth factor beta receptor signaling pathway                          | 7  | 5.99E-04 |
| GO:0007034 | Expansion | biological_process | vacuolar transport                                                                  | 7  | 2.55E-03 |
| GO:0071277 | Expansion | biological_process | cellular response to calcium ion                                                    | 7  | 5.17E-03 |
| GO:0006890 | Expansion | biological_process | retrograde vesicle-mediated transport, Golgi to ER                                  | 7  | 1.63E-02 |
| GO:0016567 | Expansion | biological_process | protein ubiquitination                                                              | 6  | 2.36E-13 |
| GO:0045944 | Expansion | biological_process | positive regulation of transcription from RNA polymerase II promoter                | 6  | 6.02E-13 |
| GO:0008380 | Expansion | biological_process | RNA splicing                                                                        | 6  | 7.72E-11 |
| GO:0042851 | Expansion | biological_process | L-alanine metabolic process                                                         | 6  | 5.17E-07 |

|            |           |                    |                                                                                  |   |          |
|------------|-----------|--------------------|----------------------------------------------------------------------------------|---|----------|
| GO:0000395 | Expansion | biological_process | mRNA 5'-splice site recognition                                                  | 6 | 5.17E-07 |
| GO:0032436 | Expansion | biological_process | positive regulation of proteasomal ubiquitin-dependent protein catabolic process | 6 | 5.17E-07 |
| GO:0044065 | Expansion | biological_process | regulation of respiratory system process                                         | 6 | 5.17E-07 |
| GO:0070329 | Expansion | biological_process | tRNA seleno-modification                                                         | 6 | 5.17E-07 |
| GO:0048147 | Expansion | biological_process | negative regulation of fibroblast proliferation                                  | 6 | 5.17E-07 |
| GO:1990573 | Expansion | biological_process | potassium ion import across plasma membrane                                      | 6 | 5.17E-07 |
| GO:0005886 | Expansion | cellular_component | plasma membrane                                                                  | 6 | 5.39E-06 |
| GO:0042060 | Expansion | biological_process | wound healing                                                                    | 6 | 3.06E-05 |
| GO:0008063 | Expansion | biological_process | Toll signaling pathway                                                           | 6 | 7.49E-05 |
| GO:0009303 | Expansion | biological_process | rRNA transcription                                                               | 6 | 7.49E-05 |
| GO:0010737 | Expansion | biological_process | protein kinase A signaling                                                       | 6 | 1.50E-04 |
| GO:0016267 | Expansion | biological_process | O-glycan processing, core 1                                                      | 6 | 2.74E-04 |
| GO:0017185 | Expansion | biological_process | peptidyl-lysine hydroxylation                                                    | 6 | 1.12E-03 |
| GO:0052689 | Expansion | molecular_function | carboxylic ester hydrolase activity                                              | 6 | 1.56E-02 |
| GO:0007605 | Expansion | biological_process | sensory perception of sound                                                      | 5 | 5.77E-07 |
| GO:0006543 | Expansion | biological_process | glutamine catabolic process                                                      | 5 | 5.82E-06 |
| GO:0000098 | Expansion | biological_process | sulfur amino acid catabolic process                                              | 5 | 5.82E-06 |
| GO:0070120 | Expansion | biological_process | ciliary neurotrophic factor-mediated signaling pathway                           | 5 | 5.82E-06 |
| GO:0007188 | Expansion | biological_process | adenylate cyclase-modulating G-protein coupled receptor signaling pathway        | 5 | 5.82E-06 |
| GO:0006754 | Expansion | biological_process | ATP biosynthetic process                                                         | 5 | 5.82E-06 |
| GO:0033043 | Expansion | biological_process | regulation of organelle organization                                             | 5 | 5.82E-06 |
| GO:0034653 | Expansion | biological_process | retinoic acid catabolic process                                                  | 5 | 5.82E-06 |
| GO:0015379 | Expansion | molecular_function | potassium:chloride symporter activity                                            | 5 | 5.82E-06 |
| GO:0040040 | Expansion | biological_process | thermosensory behavior                                                           | 5 | 5.82E-06 |
| GO:2000036 | Expansion | biological_process | regulation of stem cell maintenance                                              | 5 | 5.82E-06 |
| GO:0010971 | Expansion | biological_process | positive regulation of G2/M transition of mitotic cell cycle                     | 5 | 5.82E-06 |

|            |           |                    |                                                                                    |   |          |
|------------|-----------|--------------------|------------------------------------------------------------------------------------|---|----------|
| GO:1901388 | Expansion | biological_process | regulation of transforming growth factor beta activation                           | 5 | 3.18E-05 |
| GO:0007186 | Expansion | biological_process | G-protein coupled receptor signaling pathway                                       | 5 | 1.96E-04 |
| GO:0007156 | Expansion | biological_process | homophilic cell adhesion via plasma membrane adhesion molecules                    | 5 | 2.81E-04 |
| GO:0046034 | Expansion | biological_process | ATP metabolic process                                                              | 5 | 5.05E-04 |
| GO:0007155 | Expansion | biological_process | cell adhesion                                                                      | 5 | 6.55E-04 |
| GO:0061304 | Expansion | biological_process | retinal blood vessel morphogenesis                                                 | 5 | 9.20E-04 |
| GO:0007158 | Expansion | biological_process | neuron cell-cell adhesion                                                          | 5 | 9.20E-04 |
| GO:0035239 | Expansion | biological_process | tube morphogenesis                                                                 | 5 | 9.20E-04 |
| GO:0036324 | Expansion | biological_process | vascular endothelial growth factor receptor-2 signaling pathway                    | 5 | 1.54E-03 |
| GO:0006680 | Expansion | biological_process | glucosylceramide catabolic process                                                 | 5 | 2.40E-03 |
| GO:0030050 | Expansion | biological_process | vesicle transport along actin filament                                             | 5 | 2.40E-03 |
| GO:0022604 | Expansion | biological_process | regulation of cell morphogenesis                                                   | 5 | 3.55E-03 |
| GO:2001242 | Expansion | biological_process | regulation of intrinsic apoptotic signaling pathway                                | 5 | 5.03E-03 |
| GO:0051290 | Expansion | biological_process | protein heterotetramerization                                                      | 5 | 5.03E-03 |
| GO:2000582 | Expansion | biological_process | positive regulation of ATP-dependent microtubule motor activity, plus-end-directed | 5 | 5.03E-03 |
| GO:0008542 | Expansion | biological_process | visual learning                                                                    | 5 | 5.37E-03 |
| GO:0000028 | Expansion | biological_process | ribosomal small subunit assembly                                                   | 5 | 6.87E-03 |
| GO:0010842 | Expansion | biological_process | retina layer formation                                                             | 5 | 6.87E-03 |
| GO:0051568 | Expansion | biological_process | histone H3-K4 methylation                                                          | 5 | 6.87E-03 |
| GO:0006670 | Expansion | biological_process | sphingosine metabolic process                                                      | 5 | 6.87E-03 |
| GO:0007178 | Expansion | biological_process | transmembrane receptor protein serine/threonine kinase signaling pathway           | 5 | 6.87E-03 |
| GO:1903358 | Expansion | biological_process | regulation of Golgi organization                                                   | 5 | 6.87E-03 |
| GO:0008235 | Expansion | molecular_function | metalloexopeptidase activity                                                       | 5 | 9.10E-03 |
| GO:0008589 | Expansion | biological_process | regulation of smoothened signaling pathway                                         | 5 | 1.17E-02 |
| GO:0046470 | Expansion | biological_process | phosphatidylcholine metabolic process                                              | 5 | 1.48E-02 |
| GO:0005506 | Expansion | molecular_function | iron ion binding                                                                   | 5 | 1.83E-02 |



|            |           |                    |                                                                    |   |          |
|------------|-----------|--------------------|--------------------------------------------------------------------|---|----------|
| GO:0003700 | Expansion | molecular_function | sequence-specific DNA binding transcription factor activity        | 5 | 2.22E-02 |
| GO:0051787 | Expansion | molecular_function | misfolded protein binding                                          | 4 | 6.52E-05 |
| GO:0075732 | Expansion | biological_process | viral penetration into host nucleus                                | 4 | 6.52E-05 |
| GO:0007214 | Expansion | biological_process | gamma-aminobutyric acid signaling pathway                          | 4 | 5.15E-03 |
| GO:0007522 | Expansion | biological_process | visceral muscle development                                        | 4 | 5.15E-03 |
| GO:0050690 | Expansion | biological_process | regulation of defense response to virus by virus                   | 4 | 5.15E-03 |
| GO:0060348 | Expansion | biological_process | bone development                                                   | 4 | 5.15E-03 |
| GO:0005737 | Expansion | cellular_component | cytoplasm                                                          | 3 | 3.05E-04 |
| GO:0006477 | Expansion | biological_process | protein sulfation                                                  | 3 | 7.29E-04 |
| GO:0030201 | Expansion | biological_process | heparan sulfate proteoglycan metabolic process                     | 3 | 7.29E-04 |
| GO:0015187 | Expansion | molecular_function | glycine transmembrane transporter activity                         | 3 | 7.29E-04 |
| GO:0030278 | Expansion | biological_process | regulation of ossification                                         | 3 | 7.29E-04 |
| GO:1900746 | Expansion | biological_process | regulation of vascular endothelial growth factor signaling pathway | 3 | 6.04E-03 |
| GO:0043312 | Expansion | biological_process | neutrophil degranulation                                           | 3 | 1.95E-02 |
| GO:0007264 | Expansion | biological_process | small GTPase mediated signal transduction                          | 2 | 1.53E-09 |
| GO:0005634 | Expansion | cellular_component | nucleus                                                            | 2 | 1.84E-09 |
| GO:0050852 | Expansion | biological_process | T cell receptor signaling pathway                                  | 2 | 2.11E-08 |
| GO:0048511 | Expansion | biological_process | rhythmic process                                                   | 2 | 2.19E-03 |
| GO:0010468 | Expansion | biological_process | regulation of gene expression                                      | 2 | 6.90E-03 |
| GO:0048384 | Expansion | biological_process | retinoic acid receptor signaling pathway                           | 2 | 8.12E-03 |
| GO:0016322 | Expansion | biological_process | neuron remodeling                                                  | 2 | 8.12E-03 |
| GO:0010762 | Expansion | biological_process | regulation of fibroblast migration                                 | 2 | 8.12E-03 |
| GO:0060968 | Expansion | biological_process | regulation of gene silencing                                       | 2 | 8.12E-03 |
| GO:0035176 | Expansion | biological_process | social behavior                                                    | 2 | 2.04E-02 |

**Supplementary Table 17.** Rapidly evolving gene families in Magellanic penguin.

| GO ID      | Event     | Namespace          | Name (Child term)                                                    | Count | p-value  |
|------------|-----------|--------------------|----------------------------------------------------------------------|-------|----------|
| GO:0006334 | Expansion | biological_process | nucleosome assembly                                                  | 92    | 2.38E-94 |
| GO:0005200 | Expansion | molecular_function | structural constituent of cytoskeleton                               | 82    | 3.81E-44 |
| GO:0006355 | Expansion | biological_process | regulation of transcription, DNA-templated                           | 57    | 1.96E-02 |
| GO:0006511 | Expansion | biological_process | ubiquitin-dependent protein catabolic process                        | 46    | 8.20E-03 |
| GO:0006325 | Expansion | biological_process | chromatin organization                                               | 34    | 3.95E-20 |
| GO:0016032 | Expansion | biological_process | viral process                                                        | 29    | 2.51E-03 |
| GO:0016055 | Expansion | biological_process | Wnt signaling pathway                                                | 27    | 3.53E-04 |
| GO:0003774 | Expansion | molecular_function | motor activity                                                       | 25    | 5.96E-08 |
| GO:0015031 | Expansion | biological_process | protein transport                                                    | 25    | 4.34E-03 |
| GO:0050776 | Expansion | biological_process | regulation of immune response                                        | 22    | 1.50E-09 |
| GO:0000122 | Expansion | biological_process | negative regulation of transcription from RNA polymerase II promoter | 22    | 4.70E-03 |
| GO:0061038 | Expansion | biological_process | uterus morphogenesis                                                 | 21    | 2.41E-20 |
| GO:0006890 | Expansion | biological_process | retrograde vesicle-mediated transport, Golgi to ER                   | 21    | 3.19E-04 |
| GO:0006412 | Expansion | biological_process | translation                                                          | 21    | 1.97E-02 |
| GO:0046872 | Expansion | molecular_function | metal ion binding                                                    | 20    | 8.38E-08 |
| GO:0030433 | Expansion | biological_process | ER-associated ubiquitin-dependent protein catabolic process          | 20    | 6.09E-03 |
| GO:0007283 | Expansion | biological_process | spermatogenesis                                                      | 19    | 2.52E-02 |
| GO:0007525 | Expansion | biological_process | somatic muscle development                                           | 18    | 2.05E-11 |
| GO:0060412 | Expansion | biological_process | ventricular septum morphogenesis                                     | 18    | 6.82E-07 |
| GO:2000300 | Expansion | biological_process | regulation of synaptic vesicle exocytosis                            | 16    | 2.12E-06 |
| GO:0006357 | Expansion | biological_process | regulation of transcription from RNA polymerase II promoter          | 15    | 2.20E-06 |
| GO:0002244 | Expansion | biological_process | hematopoietic progenitor cell differentiation                        | 14    | 7.75E-09 |

|            |           |                    |                                                                      |    |          |
|------------|-----------|--------------------|----------------------------------------------------------------------|----|----------|
| GO:0048741 | Expansion | biological_process | skeletal muscle fiber development                                    | 14 | 2.19E-07 |
| GO:0008380 | Expansion | biological_process | RNA splicing                                                         | 14 | 4.01E-03 |
| GO:0007165 | Expansion | biological_process | signal transduction                                                  | 13 | 5.13E-35 |
| GO:0003677 | Expansion | molecular_function | DNA binding                                                          | 13 | 1.08E-03 |
| GO:0006904 | Expansion | biological_process | vesicle docking involved in exocytosis                               | 13 | 4.46E-03 |
| GO:0004111 | Expansion | molecular_function | creatine kinase activity                                             | 12 | 3.37E-15 |
| GO:0010142 | Expansion | biological_process | farnesyl diphosphate biosynthetic process, mevalonate pathway        | 12 | 3.37E-15 |
| GO:0004849 | Expansion | molecular_function | uridine kinase activity                                              | 12 | 3.37E-15 |
| GO:0016567 | Expansion | biological_process | protein ubiquitination                                               | 12 | 6.74E-05 |
| GO:0030100 | Expansion | biological_process | regulation of endocytosis                                            | 12 | 8.29E-05 |
| GO:0007601 | Expansion | biological_process | visual perception                                                    | 11 | 2.15E-10 |
| GO:0030335 | Expansion | biological_process | positive regulation of cell migration                                | 11 | 5.12E-06 |
| GO:0006366 | Expansion | biological_process | transcription from RNA polymerase II promoter                        | 11 | 2.60E-03 |
| GO:0007015 | Expansion | biological_process | actin filament organization                                          | 10 | 1.99E-09 |
| GO:0051321 | Expansion | biological_process | meiotic cell cycle                                                   | 10 | 1.07E-05 |
| GO:0061097 | Expansion | biological_process | regulation of protein tyrosine kinase activity                       | 9  | 1.48E-11 |
| GO:0016192 | Expansion | biological_process | vesicle-mediated transport                                           | 9  | 1.31E-08 |
| GO:0045944 | Expansion | biological_process | positive regulation of transcription from RNA polymerase II promoter | 9  | 4.04E-06 |
| GO:0051607 | Expansion | biological_process | defense response to virus                                            | 9  | 1.10E-05 |
| GO:0038123 | Expansion | biological_process | toll-like receptor TLR1:TLR2 signaling pathway                       | 8  | 2.41E-10 |
| GO:0007605 | Expansion | biological_process | sensory perception of sound                                          | 8  | 5.08E-03 |
| GO:0005634 | Expansion | cellular_component | nucleus                                                              | 8  | 5.49E-03 |
| GO:0050852 | Expansion | biological_process | T cell receptor signaling pathway                                    | 8  | 1.41E-02 |
| GO:0006897 | Expansion | biological_process | endocytosis                                                          | 8  | 1.45E-02 |
| GO:0016021 | Expansion | cellular_component | integral component of membrane                                       | 7  | 2.85E-40 |
| GO:0042450 | Expansion | biological_process | arginine biosynthetic process via ornithine                          | 7  | 3.90E-09 |
| GO:0034632 | Expansion | molecular_function | retinol transporter activity                                         | 7  | 3.90E-09 |

|            |           |                    |                                                                                     |   |          |
|------------|-----------|--------------------|-------------------------------------------------------------------------------------|---|----------|
| GO:0060819 | Expansion | biological_process | inactivation of X chromosome by genetic imprinting                                  | 7 | 3.90E-09 |
| GO:0007140 | Expansion | biological_process | male meiosis                                                                        | 7 | 3.90E-09 |
| GO:0035498 | Expansion | biological_process | carnosine metabolic process                                                         | 7 | 3.90E-09 |
| GO:0007276 | Expansion | biological_process | gamete generation                                                                   | 7 | 3.90E-09 |
| GO:0010818 | Expansion | biological_process | T cell chemotaxis                                                                   | 7 | 1.24E-07 |
| GO:0035360 | Expansion | biological_process | positive regulation of peroxisome proliferator activated receptor signaling pathway | 7 | 2.24E-06 |
| GO:0006777 | Expansion | biological_process | Mo-molybdopterin cofactor biosynthetic process                                      | 7 | 2.24E-06 |
| GO:0060261 | Expansion | biological_process | positive regulation of transcription initiation from RNA polymerase II promoter     | 7 | 2.24E-06 |
| GO:0045773 | Expansion | biological_process | positive regulation of axon extension                                               | 7 | 2.24E-06 |
| GO:0070904 | Expansion | biological_process | transepithelial L-ascorbic acid transport                                           | 7 | 1.51E-05 |
| GO:0048845 | Expansion | biological_process | venous blood vessel morphogenesis                                                   | 7 | 4.00E-05 |
| GO:0055012 | Expansion | biological_process | ventricular cardiac muscle cell differentiation                                     | 7 | 4.00E-05 |
| GO:0051382 | Expansion | biological_process | kinetochore assembly                                                                | 7 | 4.00E-05 |
| GO:0004386 | Expansion | molecular_function | helicase activity                                                                   | 7 | 6.15E-05 |
| GO:0006471 | Expansion | biological_process | protein ADP-ribosylation                                                            | 7 | 6.15E-05 |
| GO:0019731 | Expansion | biological_process | antibacterial humoral response                                                      | 7 | 1.32E-04 |
| GO:0002009 | Expansion | biological_process | morphogenesis of an epithelium                                                      | 7 | 1.32E-04 |
| GO:0007034 | Expansion | biological_process | vacuolar transport                                                                  | 7 | 3.44E-04 |
| GO:0071277 | Expansion | biological_process | cellular response to calcium ion                                                    | 7 | 7.61E-04 |
| GO:0097428 | Expansion | biological_process | protein maturation by iron-sulfur cluster transfer                                  | 7 | 2.65E-03 |
| GO:1901796 | Expansion | biological_process | regulation of signal transduction by p53 class mediator                             | 7 | 3.72E-03 |
| GO:0018105 | Expansion | biological_process | peptidyl-serine phosphorylation                                                     | 7 | 4.36E-03 |
| GO:0001659 | Expansion | biological_process | temperature homeostasis                                                             | 7 | 5.87E-03 |
| GO:0043627 | Expansion | biological_process | response to estrogen                                                                | 7 | 7.71E-03 |
| GO:0001944 | Expansion | biological_process | vasculature development                                                             | 7 | 7.71E-03 |
| GO:0006479 | Expansion | biological_process | protein methylation                                                                 | 7 | 8.76E-03 |

|            |           |                    |                                                                                    |   |          |
|------------|-----------|--------------------|------------------------------------------------------------------------------------|---|----------|
| GO:0019058 | Expansion | biological_process | viral life cycle                                                                   | 7 | 1.54E-02 |
| GO:0009408 | Expansion | biological_process | response to heat                                                                   | 7 | 1.88E-02 |
| GO:0045892 | Expansion | biological_process | negative regulation of transcription, DNA-templated                                | 7 | 2.50E-02 |
| GO:0016485 | Expansion | biological_process | protein processing                                                                 | 7 | 2.67E-02 |
| GO:0060078 | Expansion | biological_process | regulation of postsynaptic membrane potential                                      | 6 | 6.28E-08 |
| GO:0005886 | Expansion | cellular_component | plasma membrane                                                                    | 6 | 1.23E-03 |
| GO:0052689 | Expansion | molecular_function | carboxylic ester hydrolase activity                                                | 6 | 3.28E-03 |
| GO:0043565 | Expansion | molecular_function | sequence-specific DNA binding                                                      | 6 | 1.58E-02 |
| GO:0003016 | Expansion | biological_process | respiratory system process                                                         | 5 | 1.01E-06 |
| GO:0045429 | Expansion | biological_process | positive regulation of nitric oxide biosynthetic process                           | 5 | 1.01E-06 |
| GO:0007188 | Expansion | biological_process | adenylate cyclase-modulating G-protein coupled receptor signaling pathway          | 5 | 1.01E-06 |
| GO:0010863 | Expansion | biological_process | positive regulation of phospholipase C activity                                    | 5 | 1.01E-06 |
| GO:0060158 | Expansion | biological_process | phospholipase C-activating dopamine receptor signaling pathway                     | 5 | 1.01E-06 |
| GO:0010971 | Expansion | biological_process | positive regulation of G2/M transition of mitotic cell cycle                       | 5 | 1.01E-06 |
| GO:0008270 | Expansion | molecular_function | zinc ion binding                                                                   | 5 | 1.71E-05 |
| GO:0046034 | Expansion | biological_process | ATP metabolic process                                                              | 5 | 9.81E-05 |
| GO:0006937 | Expansion | biological_process | regulation of muscle contraction                                                   | 5 | 1.84E-04 |
| GO:0021978 | Expansion | biological_process | telencephalon regionalization                                                      | 5 | 1.84E-04 |
| GO:0060510 | Expansion | biological_process | Type II pneumocyte differentiation                                                 | 5 | 1.84E-04 |
| GO:2000582 | Expansion | biological_process | positive regulation of ATP-dependent microtubule motor activity, plus-end-directed | 5 | 1.13E-03 |
| GO:0001504 | Expansion | biological_process | neurotransmitter uptake                                                            | 5 | 1.13E-03 |
| GO:1903358 | Expansion | biological_process | regulation of Golgi organization                                                   | 5 | 1.59E-03 |
| GO:0071805 | Expansion | biological_process | potassium ion transmembrane transport                                              | 5 | 2.16E-03 |
| GO:0045202 | Expansion | cellular_component | synapse                                                                            | 5 | 4.74E-03 |
| GO:0046982 | Expansion | molecular_function | protein heterodimerization activity                                                | 5 | 7.30E-03 |
| GO:0006936 | Expansion | biological_process | muscle contraction                                                                 | 5 | 1.06E-02 |

|            |           |                    |                                                                         |   |          |
|------------|-----------|--------------------|-------------------------------------------------------------------------|---|----------|
| GO:0031098 | Expansion | biological_process | stress-activated protein kinase signaling cascade                       | 5 | 1.20E-02 |
| GO:0032434 | Expansion | biological_process | regulation of proteasomal ubiquitin-dependent protein catabolic process | 5 | 1.25E-02 |
| GO:0016239 | Expansion | biological_process | positive regulation of macroautophagy                                   | 5 | 1.47E-02 |
| GO:0040020 | Expansion | biological_process | regulation of meiotic nuclear division                                  | 4 | 1.61E-05 |
| GO:0006434 | Expansion | biological_process | seryl-tRNA aminoacylation                                               | 4 | 1.61E-05 |
| GO:0060048 | Expansion | biological_process | cardiac muscle contraction                                              | 4 | 1.61E-05 |
| GO:0061563 | Expansion | biological_process | trigeminal ganglion structural organization                             | 4 | 1.61E-05 |
| GO:0019511 | Expansion | biological_process | peptidyl-proline hydroxylation                                          | 4 | 1.61E-05 |
| GO:0060322 | Expansion | biological_process | head development                                                        | 4 | 1.61E-05 |
| GO:0001975 | Expansion | biological_process | response to amphetamine                                                 | 4 | 8.69E-04 |
| GO:0007214 | Expansion | biological_process | gamma-aminobutyric acid signaling pathway                               | 4 | 1.47E-03 |
| GO:0007522 | Expansion | biological_process | visceral muscle development                                             | 4 | 1.47E-03 |
| GO:0031957 | Expansion | molecular_function | very long-chain fatty acid-CoA ligase activity                          | 4 | 3.37E-03 |
| GO:0007156 | Expansion | biological_process | homophilic cell adhesion via plasma membrane adhesion molecules         | 4 | 4.10E-03 |
| GO:0007399 | Expansion | biological_process | nervous system development                                              | 4 | 5.67E-03 |
| GO:0008217 | Expansion | biological_process | regulation of blood pressure                                            | 4 | 8.42E-03 |
| GO:0051496 | Expansion | biological_process | positive regulation of stress fiber assembly                            | 4 | 8.42E-03 |
| GO:0048515 | Expansion | biological_process | spermatid differentiation                                               | 4 | 8.42E-03 |
| GO:0061032 | Expansion | biological_process | visceral serous pericardium development                                 | 4 | 1.08E-02 |
| GO:0016226 | Expansion | biological_process | iron-sulfur cluster assembly                                            | 4 | 2.36E-02 |
| GO:0030278 | Expansion | biological_process | regulation of ossification                                              | 3 | 2.56E-04 |
| GO:0006468 | Expansion | biological_process | protein phosphorylation                                                 | 3 | 2.59E-03 |
| GO:0014029 | Expansion | biological_process | neural crest formation                                                  | 3 | 1.03E-02 |
| GO:0061551 | Expansion | biological_process | trigeminal ganglion development                                         | 3 | 1.03E-02 |
| GO:0048168 | Expansion | biological_process | regulation of neuronal synaptic plasticity                              | 3 | 1.45E-02 |
| GO:0007179 | Expansion | biological_process | transforming growth factor beta receptor signaling pathway              | 2 | 7.73E-05 |
| GO:0048384 | Expansion | biological_process | retinoic acid receptor signaling pathway                                | 2 | 4.04E-03 |

|            |           |                    |                                    |   |          |
|------------|-----------|--------------------|------------------------------------|---|----------|
| GO:0072560 | Expansion | biological_process | type B pancreatic cell maturation  | 2 | 4.04E-03 |
| GO:0007603 | Expansion | biological_process | phototransduction, visible light   | 2 | 4.04E-03 |
| GO:0010762 | Expansion | biological_process | regulation of fibroblast migration | 2 | 4.04E-03 |
| GO:0048511 | Expansion | biological_process | rhythmic process                   | 2 | 2.28E-02 |

**Supplementary Table 18.** Rapidly evolving gene families in African penguin.

| <b>African</b> |              |                    |                                            |                      |                |
|----------------|--------------|--------------------|--------------------------------------------|----------------------|----------------|
| <b>GO ID</b>   | <b>Event</b> | <b>Namespace</b>   | <b>Name (Child term)</b>                   | <b>Count p-value</b> | <b>p-value</b> |
| GO:0044826     | Expansion    | biological_process | viral genome integration into host DNA     | 33                   | 1.34E-30       |
| GO:0042060     | Expansion    | biological_process | wound healing                              | 24                   | 3.75E-09       |
| GO:0004984     | Expansion    | molecular_function | olfactory receptor activity                | 20                   | 7.60E-14       |
| GO:0051291     | Expansion    | biological_process | protein heterooligomerization              | 18                   | 6.46E-19       |
| GO:0007608     | Expansion    | biological_process | sensory perception of smell                | 18                   | 4.90E-06       |
| GO:0051453     | Expansion    | biological_process | regulation of intracellular pH             | 17                   | 1.07E-21       |
| GO:0002250     | Expansion    | biological_process | adaptive immune response                   | 16                   | 4.37E-19       |
| GO:0007155     | Expansion    | biological_process | cell adhesion                              | 15                   | 3.60E-05       |
| GO:0007275     | Expansion    | biological_process | multicellular organismal development       | 15                   | 1.05E-03       |
| GO:0006313     | Expansion    | biological_process | transposition, DNA-mediated                | 14                   | 5.41E-16       |
| GO:0005198     | Expansion    | molecular_function | structural molecule activity               | 14                   | 1.12E-07       |
| GO:0006355     | Expansion    | biological_process | regulation of transcription, DNA-templated | 14                   | 3.13E-02       |
| GO:0050661     | Expansion    | molecular_function | NADP binding                               | 13                   | 2.15E-20       |
| GO:0051932     | Expansion    | biological_process | synaptic transmission, GABAergic           | 13                   | 3.90E-08       |
| GO:0051412     | Expansion    | biological_process | response to corticosterone                 | 12                   | 3.43E-14       |
| GO:0005576     | Expansion    | cellular_component | extracellular region                       | 12                   | 1.48E-02       |

|            |           |                    |                                                                            |    |          |
|------------|-----------|--------------------|----------------------------------------------------------------------------|----|----------|
| GO:0016021 | Expansion | cellular_component | integral component of membrane                                             | 10 | 1.91E-10 |
| GO:0045110 | Expansion | biological_process | intermediate filament bundle assembly                                      | 9  | 4.86E-15 |
| GO:0046513 | Expansion | biological_process | ceramide biosynthetic process                                              | 9  | 9.93E-13 |
| GO:0007411 | Expansion | biological_process | axon guidance                                                              | 9  | 6.69E-09 |
| GO:0019068 | Expansion | biological_process | virion assembly                                                            | 9  | 1.38E-07 |
| GO:0046081 | Expansion | biological_process | dUTP catabolic process                                                     | 8  | 1.98E-13 |
| GO:0004569 | Expansion | molecular_function | glycoprotein endo-alpha-1,2-mannosidase activity                           | 8  | 1.98E-13 |
| GO:0033273 | Expansion | biological_process | response to vitamin                                                        | 8  | 1.98E-13 |
| GO:0019731 | Expansion | biological_process | antibacterial humoral response                                             | 8  | 1.85E-08 |
| GO:0010951 | Expansion | biological_process | negative regulation of endopeptidase activity                              | 8  | 2.00E-05 |
| GO:0007519 | Expansion | biological_process | skeletal muscle tissue development                                         | 8  | 2.35E-05 |
| GO:0006616 | Expansion | biological_process | SRP-dependent cotranslational protein targeting to membrane, translocation | 8  | 5.68E-05 |
| GO:0051603 | Expansion | biological_process | proteolysis involved in cellular protein catabolic process                 | 8  | 1.22E-04 |
| GO:0006487 | Expansion | biological_process | protein N-linked glycosylation                                             | 8  | 3.58E-04 |
| GO:0015747 | Expansion | biological_process | urate transport                                                            | 7  | 8.86E-10 |
| GO:0005977 | Expansion | biological_process | glycogen metabolic process                                                 | 7  | 9.07E-06 |
| GO:0032012 | Expansion | biological_process | regulation of ARF protein signal transduction                              | 7  | 5.45E-05 |
| GO:0070723 | Expansion | biological_process | response to cholesterol                                                    | 6  | 2.16E-09 |
| GO:0035902 | Expansion | biological_process | response to immobilization stress                                          | 6  | 1.97E-06 |
| GO:0030488 | Expansion | biological_process | tRNA methylation                                                           | 6  | 3.38E-03 |
| GO:0042246 | Expansion | biological_process | tissue regeneration                                                        | 6  | 3.38E-03 |
| GO:0006457 | Expansion | biological_process | protein folding                                                            | 6  | 2.36E-02 |
| GO:0007165 | Expansion | biological_process | signal transduction                                                        | 5  | 1.35E-15 |
| GO:0045657 | Expansion | biological_process | positive regulation of monocyte differentiation                            | 5  | 1.25E-08 |
| GO:2000036 | Expansion | biological_process | regulation of stem cell maintenance                                        | 5  | 1.25E-08 |
| GO:0050916 | Expansion | biological_process | sensory perception of sweet taste                                          | 5  | 2.76E-06 |



|            |           |                    |                                                                    |   |          |
|------------|-----------|--------------------|--------------------------------------------------------------------|---|----------|
| GO:0008589 | Expansion | biological_process | regulation of smoothened signaling pathway                         | 5 | 5.66E-05 |
| GO:0016973 | Expansion | biological_process | poly(A)+ mRNA export from nucleus                                  | 5 | 7.64E-05 |
| GO:0005344 | Expansion | molecular_function | oxygen transporter activity                                        | 5 | 1.64E-03 |
| GO:0007525 | Expansion | biological_process | somatic muscle development                                         | 5 | 4.49E-03 |
| GO:0021537 | Expansion | biological_process | telencephalon development                                          | 5 | 1.11E-02 |
| GO:0043687 | Expansion | biological_process | post-translational protein modification                            | 5 | 1.27E-02 |
| GO:0045766 | Expansion | biological_process | positive regulation of angiogenesis                                | 4 | 4.85E-07 |
| GO:0002246 | Expansion | biological_process | wound healing involved in inflammatory response                    | 4 | 4.85E-07 |
| GO:0046677 | Expansion | biological_process | response to antibiotic                                             | 4 | 1.95E-04 |
| GO:0060314 | Expansion | biological_process | regulation of ryanodine-sensitive calcium-release channel activity | 4 | 3.74E-04 |
| GO:0043587 | Expansion | biological_process | tongue morphogenesis                                               | 4 | 1.27E-03 |
| GO:0005096 | Expansion | molecular_function | GTPase activator activity                                          | 4 | 6.00E-03 |
| GO:0030335 | Expansion | biological_process | positive regulation of cell migration                              | 4 | 1.13E-02 |
| GO:0000038 | Expansion | biological_process | very long-chain fatty acid metabolic process                       | 4 | 1.73E-02 |
| GO:1900746 | Expansion | biological_process | regulation of vascular endothelial growth factor signaling pathway | 3 | 1.77E-04 |
| GO:0016055 | Expansion | biological_process | Wnt signaling pathway                                              | 2 | 1.30E-07 |
| GO:0007601 | Expansion | biological_process | visual perception                                                  | 2 | 4.66E-07 |
| GO:0009952 | Expansion | biological_process | anterior/posterior pattern specification                           | 2 | 4.05E-03 |
| GO:0042136 | Expansion | biological_process | neurotransmitter biosynthetic process                              | 2 | 6.57E-03 |
| GO:0045893 | Expansion | biological_process | positive regulation of transcription, DNA-templated                | 2 | 1.24E-02 |

**Supplementary Table 19.** Rapidly losses gene families among Little blue and banded penguins.

| <b>GO ID</b>                         | <b>Event</b> | <b>Namespace</b> | <b>Name (Child term)</b> | <b>Count p-value</b> | <b>p-value</b> |
|--------------------------------------|--------------|------------------|--------------------------|----------------------|----------------|
| <b>Little Blue vs Banden Penguin</b> |              |                  |                          |                      |                |

|            |             |                    |                                                             |    |          |
|------------|-------------|--------------------|-------------------------------------------------------------|----|----------|
| GO:0007608 | Contraction | biological_process | sensory perception of smell                                 | 28 | 1.12E-08 |
| GO:0016021 | Contraction | cellular_component | integral component of membrane                              | 28 | 2.77E-08 |
| GO:0016032 | Contraction | biological_process | viral process                                               | 21 | 2.43E-02 |
| GO:0007165 | Contraction | biological_process | signal transduction                                         | 19 | 3.46E-14 |
| GO:0005200 | Contraction | molecular_function | structural constituent of cytoskeleton                      | 19 | 2.02E-03 |
| GO:0051453 | Contraction | biological_process | regulation of intracellular pH                              | 17 | 3.18E-18 |
| GO:0006511 | Contraction | biological_process | ubiquitin-dependent protein catabolic process               | 17 | 4.56E-06 |
| GO:0070062 | Contraction | cellular_component | extracellular exosome                                       | 16 | 1.30E-13 |
| GO:0007283 | Contraction | biological_process | spermatogenesis                                             | 16 | 1.34E-03 |
| GO:0007155 | Contraction | biological_process | cell adhesion                                               | 15 | 3.44E-03 |
| GO:0006355 | Contraction | biological_process | regulation of transcription, DNA-templated                  | 14 | 5.84E-05 |
| GO:0007586 | Contraction | biological_process | digestion                                                   | 13 | 1.51E-14 |
| GO:0000278 | Contraction | biological_process | mitotic cell cycle                                          | 13 | 2.54E-06 |
| GO:0046872 | Contraction | molecular_function | metal ion binding                                           | 13 | 1.29E-05 |
| GO:0007186 | Contraction | biological_process | G-protein coupled receptor signaling pathway                | 13 | 2.78E-02 |
| GO:0006313 | Contraction | biological_process | transposition, DNA-mediated                                 | 12 | 1.76E-10 |
| GO:0030335 | Contraction | biological_process | positive regulation of cell migration                       | 11 | 7.57E-08 |
| GO:0006357 | Contraction | biological_process | regulation of transcription from RNA polymerase II promoter | 11 | 3.85E-04 |
| GO:0044826 | Contraction | biological_process | viral genome integration into host DNA                      | 11 | 1.08E-03 |
| GO:0046685 | Contraction | biological_process | response to arsenic-containing substance                    | 10 | 1.20E-14 |
| GO:0016055 | Contraction | biological_process | Wnt signaling pathway                                       | 10 | 3.01E-06 |
| GO:0033260 | Contraction | biological_process | nuclear DNA replication                                     | 9  | 3.06E-13 |
| GO:0016192 | Contraction | biological_process | vesicle-mediated transport                                  | 9  | 2.17E-04 |
| GO:0042273 | Contraction | biological_process | ribosomal large subunit biogenesis                          | 9  | 2.65E-04 |
| GO:0002098 | Contraction | biological_process | tRNA wobble uridine modification                            | 9  | 6.49E-04 |

|            |             |                    |                                                                             |   |          |
|------------|-------------|--------------------|-----------------------------------------------------------------------------|---|----------|
| GO:0005975 | Contraction | biological_process | carbohydrate metabolic process                                              | 9 | 3.69E-03 |
| GO:0004984 | Contraction | molecular_function | olfactory receptor activity                                                 | 9 | 9.15E-03 |
| GO:0006904 | Contraction | biological_process | vesicle docking involved in exocytosis                                      | 9 | 1.16E-02 |
| GO:0046081 | Contraction | biological_process | dUTP catabolic process                                                      | 8 | 7.74E-12 |
| GO:0038123 | Contraction | biological_process | toll-like receptor TLR1:TLR2 signaling pathway                              | 8 | 7.74E-12 |
| GO:0051786 | Contraction | molecular_function | all-trans-retinol 13,14-reductase activity                                  | 8 | 6.69E-11 |
| GO:0006865 | Contraction | biological_process | amino acid transport                                                        | 8 | 1.31E-07 |
| GO:0031175 | Contraction | biological_process | neuron projection development                                               | 8 | 3.50E-03 |
| GO:0019432 | Contraction | biological_process | triglyceride biosynthetic process                                           | 8 | 3.50E-03 |
| GO:0044319 | Contraction | biological_process | wound healing, spreading of cells                                           | 8 | 4.18E-03 |
| GO:0032496 | Contraction | biological_process | response to lipopolysaccharide                                              | 8 | 2.43E-02 |
| GO:0006915 | Contraction | biological_process | apoptotic process                                                           | 8 | 2.80E-02 |
| GO:0006068 | Contraction | biological_process | ethanol catabolic process                                                   | 7 | 1.94E-10 |
| GO:0007157 | Contraction | biological_process | heterophilic cell-cell adhesion via plasma membrane cell adhesion molecules | 7 | 1.94E-10 |
| GO:0051492 | Contraction | biological_process | regulation of stress fiber assembly                                         | 7 | 1.54E-06 |
| GO:0051289 | Contraction | biological_process | protein homotetramerization                                                 | 7 | 2.67E-03 |
| GO:0043065 | Contraction | biological_process | positive regulation of apoptotic process                                    | 6 | 2.44E-02 |
| GO:0070374 | Contraction | biological_process | positive regulation of ERK1 and ERK2 cascade                                | 6 | 2.60E-02 |
| GO:0007601 | Contraction | biological_process | visual perception                                                           | 5 | 8.60E-09 |
| GO:0003334 | Contraction | biological_process | keratinocyte development                                                    | 5 | 1.20E-07 |
| GO:0016592 | Contraction | cellular_component | mediator complex                                                            | 5 | 1.20E-07 |
| GO:0071333 | Contraction | biological_process | cellular response to glucose stimulus                                       | 5 | 1.20E-07 |
| GO:0035282 | Contraction | biological_process | segmentation                                                                | 5 | 2.31E-06 |
| GO:0046883 | Contraction | biological_process | regulation of hormone secretion                                             | 5 | 2.45E-05 |
| GO:0035751 | Contraction | biological_process | regulation of lysosomal lumen pH                                            | 5 | 2.45E-05 |

|            |             |                    |                                                                                    |   |          |
|------------|-------------|--------------------|------------------------------------------------------------------------------------|---|----------|
| GO:0006776 | Contraction | biological_process | vitamin A metabolic process                                                        | 5 | 2.45E-05 |
| GO:0043457 | Contraction | biological_process | regulation of cellular respiration                                                 | 5 | 2.45E-05 |
| GO:0021978 | Contraction | biological_process | telencephalon regionalization                                                      | 5 | 2.45E-05 |
| GO:0017188 | Contraction | molecular_function | aspartate N-acetyltransferase activity                                             | 5 | 2.45E-05 |
| GO:0030208 | Contraction | biological_process | dermatan sulfate biosynthetic process                                              | 5 | 2.45E-05 |
| GO:0030672 | Contraction | cellular_component | synaptic vesicle membrane                                                          | 5 | 2.45E-05 |
| GO:0016567 | Contraction | biological_process | protein ubiquitination                                                             | 5 | 4.40E-05 |
| GO:0071805 | Contraction | biological_process | potassium ion transmembrane transport                                              | 5 | 3.31E-04 |
| GO:0050871 | Contraction | biological_process | positive regulation of B cell activation                                           | 5 | 4.50E-04 |
| GO:0043523 | Contraction | biological_process | regulation of neuron apoptotic process                                             | 5 | 1.25E-03 |
| GO:0043149 | Contraction | biological_process | stress fiber assembly                                                              | 5 | 1.91E-03 |
| GO:0009791 | Contraction | biological_process | post-embryonic development                                                         | 5 | 1.91E-03 |
| GO:0006364 | Contraction | biological_process | rRNA processing                                                                    | 5 | 2.04E-03 |
| GO:0031514 | Contraction | cellular_component | motile cilium                                                                      | 5 | 3.30E-03 |
| GO:0046415 | Contraction | biological_process | urate metabolic process                                                            | 5 | 1.12E-02 |
| GO:0035567 | Contraction | biological_process | non-canonical Wnt signaling pathway                                                | 5 | 1.68E-02 |
| GO:0016338 | Contraction | biological_process | calcium-independent cell-cell adhesion via plasma membrane cell-adhesion molecules | 5 | 2.01E-02 |
| GO:0007219 | Contraction | biological_process | Notch signaling pathway                                                            | 5 | 2.01E-02 |
| GO:0045663 | Contraction | biological_process | positive regulation of myoblast differentiation                                    | 4 | 2.94E-06 |
| GO:0035220 | Contraction | biological_process | wing disc development                                                              | 4 | 2.94E-06 |
| GO:0045944 | Contraction | biological_process | positive regulation of transcription from RNA polymerase II promoter               | 4 | 1.47E-05 |
| GO:0061630 | Contraction | molecular_function | ubiquitin protein ligase activity                                                  | 4 | 3.01E-04 |
| GO:0006556 | Contraction | biological_process | S-adenosylmethionine biosynthetic process                                          | 4 | 3.01E-04 |
| GO:2001256 | Contraction | biological_process | regulation of store-operated calcium entry                                         | 4 | 1.94E-03 |

|            |             |                    |                                                                                    |   |          |
|------------|-------------|--------------------|------------------------------------------------------------------------------------|---|----------|
| GO:2000582 | Contraction | biological_process | positive regulation of ATP-dependent microtubule motor activity, plus-end-directed | 4 | 1.94E-03 |
| GO:0039702 | Contraction | biological_process | viral budding via host ESCRT complex                                               | 4 | 1.55E-02 |
| GO:0005096 | Contraction | molecular_function | GTPase activator activity                                                          | 4 | 2.46E-02 |
| GO:0010867 | Contraction | biological_process | positive regulation of triglyceride biosynthetic process                           | 3 | 3.25E-03 |
| GO:0048168 | Contraction | biological_process | regulation of neuronal synaptic plasticity                                         | 3 | 4.68E-03 |
| GO:0045599 | Contraction | biological_process | negative regulation of fat cell differentiation                                    | 3 | 8.46E-03 |
| GO:0005044 | Contraction | molecular_function | scavenger receptor activity                                                        | 3 | 1.64E-02 |
| GO:0007017 | Contraction | biological_process | microtubule-based process                                                          | 3 | 3.12E-02 |
| GO:0005886 | Contraction | cellular_component | plasma membrane                                                                    | 2 | 7.77E-04 |
| GO:0010092 | Contraction | biological_process | specification of organ identity                                                    | 2 | 1.74E-03 |
| GO:0007399 | Contraction | biological_process | nervous system development                                                         | 2 | 1.26E-02 |

**Supplementary Table 20.** Rapidly losses gene families between Galápagos and Humboldt penguins

| Galápagos<br>Humboldt |              |                    |                                               |                      |                |
|-----------------------|--------------|--------------------|-----------------------------------------------|----------------------|----------------|
| <b>GO ID</b>          | <b>Event</b> | <b>Namespace</b>   | <b>Name (Child term)</b>                      | <b>Count p-value</b> | <b>p-value</b> |
| GO:0007608            | Contraction  | biological_process | sensory perception of smell                   | 28                   | 1.12E-08       |
| GO:0016021            | Contraction  | cellular_component | integral component of membrane                | 28                   | 2.77E-08       |
| GO:0016032            | Contraction  | biological_process | viral process                                 | 21                   | 2.43E-02       |
| GO:0007165            | Contraction  | biological_process | signal transduction                           | 19                   | 3.46E-14       |
| GO:0005200            | Contraction  | molecular_function | structural constituent of cytoskeleton        | 19                   | 2.02E-03       |
| GO:0051453            | Contraction  | biological_process | regulation of intracellular pH                | 17                   | 3.18E-18       |
| GO:0006511            | Contraction  | biological_process | ubiquitin-dependent protein catabolic process | 17                   | 4.56E-06       |

|            |             |                    |                                                             |    |          |
|------------|-------------|--------------------|-------------------------------------------------------------|----|----------|
| GO:0070062 | Contraction | cellular_component | extracellular exosome                                       | 16 | 1.30E-13 |
| GO:0007283 | Contraction | biological_process | spermatogenesis                                             | 16 | 1.34E-03 |
| GO:0007155 | Contraction | biological_process | cell adhesion                                               | 15 | 3.44E-03 |
| GO:0006355 | Contraction | biological_process | regulation of transcription, DNA-templated                  | 14 | 5.84E-05 |
| GO:0007586 | Contraction | biological_process | digestion                                                   | 13 | 1.51E-14 |
| GO:0000278 | Contraction | biological_process | mitotic cell cycle                                          | 13 | 2.54E-06 |
| GO:0046872 | Contraction | molecular_function | metal ion binding                                           | 13 | 1.29E-05 |
| GO:0007186 | Contraction | biological_process | G-protein coupled receptor signaling pathway                | 13 | 2.78E-02 |
| GO:0006313 | Contraction | biological_process | transposition, DNA-mediated                                 | 12 | 1.76E-10 |
| GO:0030335 | Contraction | biological_process | positive regulation of cell migration                       | 11 | 7.57E-08 |
| GO:0006357 | Contraction | biological_process | regulation of transcription from RNA polymerase II promoter | 11 | 3.85E-04 |
| GO:0044826 | Contraction | biological_process | viral genome integration into host DNA                      | 11 | 1.08E-03 |
| GO:0046685 | Contraction | biological_process | response to arsenic-containing substance                    | 10 | 1.20E-14 |
| GO:0016055 | Contraction | biological_process | Wnt signaling pathway                                       | 10 | 3.01E-06 |
| GO:0033260 | Contraction | biological_process | nuclear DNA replication                                     | 9  | 3.06E-13 |
| GO:0016192 | Contraction | biological_process | vesicle-mediated transport                                  | 9  | 2.17E-04 |
| GO:0042273 | Contraction | biological_process | ribosomal large subunit biogenesis                          | 9  | 2.65E-04 |
| GO:0002098 | Contraction | biological_process | tRNA wobble uridine modification                            | 9  | 6.49E-04 |
| GO:0005975 | Contraction | biological_process | carbohydrate metabolic process                              | 9  | 3.69E-03 |
| GO:0004984 | Contraction | molecular_function | olfactory receptor activity                                 | 9  | 9.15E-03 |
| GO:0006904 | Contraction | biological_process | vesicle docking involved in exocytosis                      | 9  | 1.16E-02 |
| GO:0046081 | Contraction | biological_process | dUTP catabolic process                                      | 8  | 7.74E-12 |
| GO:0038123 | Contraction | biological_process | toll-like receptor TLR1:TLR2 signaling pathway              | 8  | 7.74E-12 |
| GO:0051786 | Contraction | molecular_function | all-trans-retinol 13,14-reductase activity                  | 8  | 6.69E-11 |
| GO:0006865 | Contraction | biological_process | amino acid transport                                        | 8  | 1.31E-07 |
| GO:0031175 | Contraction | biological_process | neuron projection development                               | 8  | 3.50E-03 |
| GO:0019432 | Contraction | biological_process | triglyceride biosynthetic process                           | 8  | 3.50E-03 |

|            |             |                    |                                                                             |   |          |
|------------|-------------|--------------------|-----------------------------------------------------------------------------|---|----------|
| GO:0044319 | Contraction | biological_process | wound healing, spreading of cells                                           | 8 | 4.18E-03 |
| GO:0032496 | Contraction | biological_process | response to lipopolysaccharide                                              | 8 | 2.43E-02 |
| GO:0006915 | Contraction | biological_process | apoptotic process                                                           | 8 | 2.80E-02 |
| GO:0006068 | Contraction | biological_process | ethanol catabolic process                                                   | 7 | 1.94E-10 |
| GO:0007157 | Contraction | biological_process | heterophilic cell-cell adhesion via plasma membrane cell adhesion molecules | 7 | 1.94E-10 |
| GO:0051492 | Contraction | biological_process | regulation of stress fiber assembly                                         | 7 | 1.54E-06 |
| GO:0051289 | Contraction | biological_process | protein homotetramerization                                                 | 7 | 2.67E-03 |
| GO:0043065 | Contraction | biological_process | positive regulation of apoptotic process                                    | 6 | 2.44E-02 |
| GO:0070374 | Contraction | biological_process | positive regulation of ERK1 and ERK2 cascade                                | 6 | 2.60E-02 |
| GO:0007601 | Contraction | biological_process | visual perception                                                           | 5 | 8.60E-09 |
| GO:0003334 | Contraction | biological_process | keratinocyte development                                                    | 5 | 1.20E-07 |
| GO:0016592 | Contraction | cellular_component | mediator complex                                                            | 5 | 1.20E-07 |
| GO:0071333 | Contraction | biological_process | cellular response to glucose stimulus                                       | 5 | 1.20E-07 |
| GO:0035282 | Contraction | biological_process | segmentation                                                                | 5 | 2.31E-06 |
| GO:0046883 | Contraction | biological_process | regulation of hormone secretion                                             | 5 | 2.45E-05 |
| GO:0035751 | Contraction | biological_process | regulation of lysosomal lumen pH                                            | 5 | 2.45E-05 |
| GO:0006776 | Contraction | biological_process | vitamin A metabolic process                                                 | 5 | 2.45E-05 |
| GO:0043457 | Contraction | biological_process | regulation of cellular respiration                                          | 5 | 2.45E-05 |
| GO:0021978 | Contraction | biological_process | telencephalon regionalization                                               | 5 | 2.45E-05 |
| GO:0017188 | Contraction | molecular_function | aspartate N-acetyltransferase activity                                      | 5 | 2.45E-05 |
| GO:0030208 | Contraction | biological_process | dermatan sulfate biosynthetic process                                       | 5 | 2.45E-05 |
| GO:0030672 | Contraction | cellular_component | synaptic vesicle membrane                                                   | 5 | 2.45E-05 |
| GO:0016567 | Contraction | biological_process | protein ubiquitination                                                      | 5 | 4.40E-05 |
| GO:0071805 | Contraction | biological_process | potassium ion transmembrane transport                                       | 5 | 3.31E-04 |
| GO:0050871 | Contraction | biological_process | positive regulation of B cell activation                                    | 5 | 4.50E-04 |
| GO:0043523 |             | biological_process | regulation of neuron apoptotic process                                      | 5 | 1.25E-03 |

|            |  |                    |                                                                                    |   |          |
|------------|--|--------------------|------------------------------------------------------------------------------------|---|----------|
| GO:0043149 |  | biological_process | stress fiber assembly                                                              | 5 | 1.91E-03 |
| GO:0009791 |  | biological_process | post-embryonic development                                                         | 5 | 1.91E-03 |
| GO:0006364 |  | biological_process | rRNA processing                                                                    | 5 | 2.04E-03 |
| GO:0031514 |  | cellular_component | motile cilium                                                                      | 5 | 3.30E-03 |
| GO:0046415 |  | biological_process | urate metabolic process                                                            | 5 | 1.12E-02 |
| GO:0035567 |  | biological_process | non-canonical Wnt signaling pathway                                                | 5 | 1.68E-02 |
| GO:0016338 |  | biological_process | calcium-independent cell-cell adhesion via plasma membrane cell-adhesion molecules | 5 | 2.01E-02 |
| GO:0007219 |  | biological_process | Notch signaling pathway                                                            | 5 | 2.01E-02 |
| GO:0045663 |  | biological_process | positive regulation of myoblast differentiation                                    | 4 | 2.94E-06 |
| GO:0035220 |  | biological_process | wing disc development                                                              | 4 | 2.94E-06 |
| GO:0045944 |  | biological_process | positive regulation of transcription from RNA polymerase II promoter               | 4 | 1.47E-05 |
| GO:0061630 |  | molecular_function | ubiquitin protein ligase activity                                                  | 4 | 3.01E-04 |
| GO:0006556 |  | biological_process | S-adenosylmethionine biosynthetic process                                          | 4 | 3.01E-04 |
| GO:2001256 |  | biological_process | regulation of store-operated calcium entry                                         | 4 | 1.94E-03 |
| GO:2000582 |  | biological_process | positive regulation of ATP-dependent microtubule motor activity, plus-end-directed | 4 | 1.94E-03 |
| GO:0039702 |  | biological_process | viral budding via host ESCRT complex                                               | 4 | 1.55E-02 |
| GO:0005096 |  | molecular_function | GTPase activator activity                                                          | 4 | 2.46E-02 |
| GO:0010867 |  | biological_process | positive regulation of triglyceride biosynthetic process                           | 3 | 3.25E-03 |
| GO:0048168 |  | biological_process | regulation of neuronal synaptic plasticity                                         | 3 | 4.68E-03 |
| GO:0045599 |  | biological_process | negative regulation of fat cell differentiation                                    | 3 | 8.46E-03 |
| GO:0005044 |  | molecular_function | scavenger receptor activity                                                        | 3 | 1.64E-02 |
| GO:0007017 |  | biological_process | microtubule-based process                                                          | 3 | 3.12E-02 |
| GO:0005886 |  | cellular_component | plasma membrane                                                                    | 2 | 7.77E-04 |
| GO:0010092 |  | biological_process | specification of organ identity                                                    | 2 | 1.74E-03 |
| GO:0007399 |  | biological_process | nervous system development                                                         | 2 | 1.26E-02 |



**Supplementary Table 21.** Rapidly losses gene families between Magellanic and African penguins

| <b>Magellanic-African</b> |              |                    |                                                   |                      |                |
|---------------------------|--------------|--------------------|---------------------------------------------------|----------------------|----------------|
| <b>GO ID</b>              | <b>Event</b> | <b>Namespace</b>   | <b>Name (Child term)</b>                          | <b>Count p-value</b> | <b>p-value</b> |
| GO:0007608                | Contraction  | biological_process | sensory perception of smell                       | 28                   | 1.01E-11       |
| GO:0000278                | Contraction  | biological_process | mitotic cell cycle                                | 21                   | 2.08E-16       |
| GO:0016020                | Contraction  | cellular_component | membrane                                          | 21                   | 1.20E-12       |
| GO:0015031                | Contraction  | biological_process | protein transport                                 | 10                   | 7.78E-03       |
| GO:0007165                | Contraction  | biological_process | signal transduction                               | 6                    | 5.72E-18       |
| GO:0006355                | Contraction  | biological_process | regulation of transcription, DNA-templated        | 6                    | 2.07E-06       |
| GO:0006953                | Contraction  | biological_process | acute-phase response                              | 5                    | 3.50E-04       |
| GO:0016021                | Contraction  | cellular_component | integral component of membrane                    | 4                    | 2.42E-19       |
| GO:0007283                | Contraction  | biological_process | spermatogenesis                                   | 4                    | 4.26E-07       |
| GO:0016192                | Contraction  | biological_process | vesicle-mediated transport                        | 4                    | 4.25E-05       |
| GO:0007016                | Contraction  | biological_process | cytoskeletal anchoring at plasma membrane         | 4                    | 6.80E-04       |
| GO:0060545                | Contraction  | biological_process | positive regulation of necroptotic process        | 3                    | 3.02E-05       |
| GO:1901031                | Contraction  | biological_process | regulation of response to reactive oxygen species | 3                    | 3.02E-05       |
| GO:0006412                | Contraction  | biological_process | translation                                       | 3                    | 1.20E-04       |
| GO:0035744                | Contraction  | biological_process | T-helper 1 cell cytokine production               | 3                    | 1.45E-03       |
| GO:0002026                | Contraction  | biological_process | regulation of the force of heart contraction      | 3                    | 1.45E-03       |

|            |             |                    |                                                                                            |   |          |
|------------|-------------|--------------------|--------------------------------------------------------------------------------------------|---|----------|
| GO:0004129 | Contraction | molecular_function | cytochrome-c oxidase activity                                                              | 3 | 5.03E-03 |
| GO:0005044 | Contraction | molecular_function | scavenger receptor activity                                                                | 3 | 7.81E-03 |
| GO:0051258 | Contraction | biological_process | protein polymerization                                                                     | 3 | 9.47E-03 |
| GO:0007017 | Contraction | biological_process | microtubule-based process                                                                  | 3 | 1.55E-02 |
| GO:0046872 | Contraction | molecular_function | metal ion binding                                                                          | 2 | 4.98E-10 |
| GO:0016567 | Contraction | biological_process | protein ubiquitination                                                                     | 2 | 2.52E-05 |
| GO:0004715 | Contraction | molecular_function | non-membrane spanning protein tyrosine kinase activity                                     | 2 | 9.79E-04 |
| GO:0032648 | Contraction | biological_process | regulation of interferon-beta production                                                   | 2 | 9.79E-04 |
| GO:0050793 | Contraction | biological_process | regulation of developmental process                                                        | 2 | 9.79E-04 |
| GO:0060179 | Contraction | biological_process | male mating behavior                                                                       | 2 | 9.79E-04 |
| GO:0048037 | Contraction | molecular_function | cofactor binding                                                                           | 2 | 9.79E-04 |
| GO:0031998 | Contraction | biological_process | regulation of fatty acid beta-oxidation                                                    | 2 | 9.79E-04 |
| GO:0006105 | Contraction | biological_process | succinate metabolic process                                                                | 2 | 9.79E-04 |
| GO:0016616 | Contraction | molecular_function | oxidoreductase activity, acting on the CH-OH group of donors, NAD or NADP as acceptor      | 2 | 2.85E-03 |
| GO:0060994 | Contraction | biological_process | regulation of transcription from RNA polymerase II promoter involved in kidney development | 2 | 2.85E-03 |
| GO:0033993 | Contraction | biological_process | response to lipid                                                                          | 2 | 8.91E-03 |
| GO:1900746 | Contraction | biological_process | regulation of vascular endothelial growth factor signaling pathway                         | 2 | 8.91E-03 |
| GO:0007275 | Contraction | biological_process | multicellular organismal development                                                       | 2 | 1.20E-02 |
| GO:0032438 | Contraction | biological_process | melanosome organization                                                                    | 2 | 1.30E-02 |
| GO:0042060 | Contraction | biological_process | wound healing                                                                              | 2 | 1.39E-02 |
| GO:0030593 | Contraction | biological_process | neutrophil chemotaxis                                                                      | 2 | 1.76E-02 |

**Supplementary Table 22.** Rapidly losses gene families in Galápagos penguin

| Galápagos  |             |                    |                                                                 |               |          |
|------------|-------------|--------------------|-----------------------------------------------------------------|---------------|----------|
| GO ID      | Event       | Namespace          | Name (Child term)                                               | Count p-value | p-value  |
| GO:0006334 | Contraction | biological_process | nucleosome assembly                                             | 87            | 4.15E-69 |
| GO:0005200 | Contraction | molecular_function | structural constituent of cytoskeleton                          | 87            | 2.32E-35 |
| GO:0007165 | Contraction | biological_process | signal transduction                                             | 46            | 5.81E-27 |
| GO:0006355 | Contraction | biological_process | regulation of transcription, DNA-templated                      | 40            | 8.17E-06 |
| GO:0007608 | Contraction | biological_process | sensory perception of smell                                     | 37            | 1.94E-05 |
| GO:0006325 | Contraction | biological_process | chromatin organization                                          | 27            | 1.29E-09 |
| GO:0007156 | Contraction | biological_process | homophilic cell adhesion via plasma membrane adhesion molecules | 25            | 1.25E-02 |
| GO:0016021 | Contraction | cellular_component | integral component of membrane                                  | 24            | 3.63E-42 |
| GO:0046872 | Contraction | molecular_function | metal ion binding                                               | 24            | 5.26E-13 |
| GO:0016032 | Contraction | biological_process | viral process                                                   | 24            | 3.77E-10 |
| GO:0007525 | Contraction | biological_process | somatic muscle development                                      | 18            | 7.17E-09 |
| GO:0006511 | Contraction | biological_process | ubiquitin-dependent protein catabolic process                   | 17            | 2.60E-24 |
| GO:0007283 | Contraction | biological_process | spermatogenesis                                                 | 16            | 2.21E-15 |
| GO:0015031 | Contraction | biological_process | protein transport                                               | 16            | 1.96E-11 |
| GO:0007601 | Contraction | biological_process | visual perception                                               | 15            | 6.11E-15 |
| GO:0050776 | Contraction | biological_process | regulation of immune response                                   | 15            | 2.96E-03 |
| GO:0016055 | Contraction | biological_process | Wnt signaling pathway                                           | 14            | 2.26E-17 |
| GO:0036158 | Contraction | biological_process | outer dynein arm assembly                                       | 14            | 1.30E-03 |

|            |             |                    |                                                                      |    |          |
|------------|-------------|--------------------|----------------------------------------------------------------------|----|----------|
| GO:0006417 | Contraction | biological_process | regulation of translation                                            | 14 | 3.64E-03 |
| GO:0050852 | Contraction | biological_process | T cell receptor signaling pathway                                    | 14 | 1.83E-02 |
| GO:0006357 | Contraction | biological_process | regulation of transcription from RNA polymerase II promoter          | 13 | 1.82E-13 |
| GO:0050661 | Contraction | molecular_function | NADP binding                                                         | 13 | 2.91E-13 |
| GO:0045893 | Contraction | biological_process | positive regulation of transcription, DNA-templated                  | 13 | 1.57E-03 |
| GO:0000278 | Contraction | biological_process | mitotic cell cycle                                                   | 13 | 4.48E-03 |
| GO:0007275 | Contraction | biological_process | multicellular organismal development                                 | 12 | 5.52E-03 |
| GO:0030335 | Contraction | biological_process | positive regulation of cell migration                                | 11 | 1.34E-04 |
| GO:0042310 | Contraction | biological_process | vasoconstriction                                                     | 11 | 1.20E-02 |
| GO:0034765 | Contraction | biological_process | regulation of ion transmembrane transport                            | 10 | 2.09E-03 |
| GO:0045944 | Contraction | biological_process | positive regulation of transcription from RNA polymerase II promoter | 9  | 1.12E-10 |
| GO:0045110 | Contraction | biological_process | intermediate filament bundle assembly                                | 9  | 3.79E-10 |
| GO:0000921 | Contraction | biological_process | septin ring assembly                                                 | 9  | 1.75E-04 |
| GO:0051259 | Contraction | biological_process | protein oligomerization                                              | 9  | 1.87E-02 |
| GO:0016567 | Contraction | biological_process | protein ubiquitination                                               | 8  | 8.38E-12 |
| GO:0046081 | Contraction | biological_process | dUTP catabolic process                                               | 8  | 4.27E-09 |
| GO:0038123 | Contraction | biological_process | toll-like receptor TLR1:TLR2 signaling pathway                       | 8  | 4.27E-09 |
| GO:0042060 | Contraction | biological_process | wound healing                                                        | 8  | 2.84E-04 |
| GO:0060236 | Contraction | biological_process | regulation of mitotic spindle organization                           | 8  | 6.86E-03 |
| GO:0035567 | Contraction | biological_process | non-canonical Wnt signaling pathway                                  | 8  | 1.45E-02 |
| GO:0007140 | Contraction | biological_process | male meiosis                                                         | 7  | 4.80E-08 |
| GO:0031957 | Contraction | molecular_function | very long-chain fatty acid-CoA ligase activity                       | 7  | 1.09E-05 |
| GO:0045892 | Contraction | biological_process | negative regulation of transcription, DNA-templated                  | 7  | 8.09E-04 |

|            |             |                    |                                                                           |   |          |
|------------|-------------|--------------------|---------------------------------------------------------------------------|---|----------|
| GO:0006412 | Contraction | biological_process | translation                                                               | 6 | 1.12E-13 |
| GO:0008270 | Contraction | molecular_function | zinc ion binding                                                          | 6 | 3.65E-08 |
| GO:0005634 | Contraction | cellular_component | nucleus                                                                   | 6 | 2.74E-06 |
| GO:0070723 | Contraction | biological_process | response to cholesterol                                                   | 6 | 3.43E-06 |
| GO:0030071 | Contraction | biological_process | regulation of mitotic metaphase/anaphase transition                       | 6 | 1.56E-04 |
| GO:0000122 | Contraction | biological_process | negative regulation of transcription from RNA polymerase II promoter      | 6 | 2.57E-04 |
| GO:0007186 | Contraction | biological_process | G-protein coupled receptor signaling pathway                              | 6 | 5.84E-04 |
| GO:0001570 | Contraction | biological_process | vasculogenesis                                                            | 6 | 1.49E-02 |
| GO:0052689 | Contraction | molecular_function | carboxylic ester hydrolase activity                                       | 6 | 1.60E-02 |
| GO:0007188 | Contraction | biological_process | adenylate cyclase-modulating G-protein coupled receptor signaling pathway | 5 | 6.01E-06 |
| GO:0045657 | Contraction | biological_process | positive regulation of monocyte differentiation                           | 5 | 6.01E-06 |
| GO:2000036 | Contraction | biological_process | regulation of stem cell maintenance                                       | 5 | 6.01E-06 |
| GO:0071333 | Contraction | biological_process | cellular response to glucose stimulus                                     | 5 | 6.01E-06 |
| GO:0030850 | Contraction | biological_process | prostate gland development                                                | 5 | 6.01E-06 |
| GO:0051260 | Contraction | biological_process | protein homooligomerization                                               | 5 | 8.00E-04 |
| GO:0006937 | Contraction | biological_process | regulation of muscle contraction                                          | 5 | 9.47E-04 |
| GO:0043457 | Contraction | biological_process | regulation of cellular respiration                                        | 5 | 9.47E-04 |
| GO:0021978 | Contraction | biological_process | telencephalon regionalization                                             | 5 | 9.47E-04 |
| GO:0017188 | Contraction | molecular_function | aspartate N-acetyltransferase activity                                    | 5 | 9.47E-04 |
| GO:0051493 | Contraction | biological_process | regulation of cytoskeleton organization                                   | 5 | 9.47E-04 |
| GO:0060510 | Contraction | biological_process | Type II pneumocyte differentiation                                        | 5 | 9.47E-04 |
| GO:0045862 | Contraction | biological_process | positive regulation of proteolysis                                        | 5 | 9.47E-04 |
| GO:0009651 | Contraction | biological_process | response to salt stress                                                   | 5 | 9.47E-04 |

|            |             |                    |                                                                  |   |          |
|------------|-------------|--------------------|------------------------------------------------------------------|---|----------|
| GO:0033209 | Contraction | biological_process | tumor necrosis factor-mediated signaling pathway                 | 5 | 1.11E-02 |
| GO:0016192 | Contraction | biological_process | vesicle-mediated transport                                       | 4 | 1.45E-19 |
| GO:0006351 | Contraction | biological_process | transcription, DNA-templated                                     | 4 | 3.52E-07 |
| GO:0045663 | Contraction | biological_process | positive regulation of myoblast differentiation                  | 4 | 6.69E-05 |
| GO:0006434 | Contraction | biological_process | seryl-tRNA aminoacylation                                        | 4 | 6.69E-05 |
| GO:0045766 | Contraction | biological_process | positive regulation of angiogenesis                              | 4 | 6.69E-05 |
| GO:0002246 | Contraction | biological_process | wound healing involved in inflammatory response                  | 4 | 6.69E-05 |
| GO:0061563 | Contraction | biological_process | trigeminal ganglion structural organization                      | 4 | 6.69E-05 |
| GO:0006468 | Contraction | biological_process | protein phosphorylation                                          | 4 | 1.98E-04 |
| GO:0001975 | Contraction | biological_process | response to amphetamine                                          | 4 | 3.21E-03 |
| GO:0061630 | Contraction | molecular_function | ubiquitin protein ligase activity                                | 4 | 5.26E-03 |
| GO:0007214 | Contraction | biological_process | gamma-aminobutyric acid signaling pathway                        | 4 | 5.26E-03 |
| GO:0050690 | Contraction | biological_process | regulation of defense response to virus by virus                 | 4 | 5.26E-03 |
| GO:0008380 | Contraction | biological_process | RNA splicing                                                     | 3 | 9.01E-14 |
| GO:0006508 | Contraction | biological_process | proteolysis                                                      | 3 | 6.48E-13 |
| GO:0007264 | Contraction | biological_process | small GTPase mediated signal transduction                        | 3 | 1.24E-08 |
| GO:0055085 | Contraction | biological_process | transmembrane transport                                          | 3 | 1.19E-07 |
| GO:0007169 | Contraction | biological_process | transmembrane receptor protein tyrosine kinase signaling pathway | 3 | 2.78E-06 |
| GO:0006979 | Contraction | biological_process | response to oxidative stress                                     | 3 | 4.27E-06 |
| GO:0006367 | Contraction | biological_process | transcription initiation from RNA polymerase II promoter         | 3 | 5.06E-06 |
| GO:0006477 | Contraction | biological_process | protein sulfation                                                | 3 | 7.43E-04 |
| GO:0030201 | Contraction | biological_process | heparan sulfate proteoglycan metabolic process                   | 3 | 7.43E-04 |
| GO:0042942 | Contraction | biological_process | D-serine transport                                               | 3 | 7.43E-04 |

|            |             |                    |                                                                        |   |          |
|------------|-------------|--------------------|------------------------------------------------------------------------|---|----------|
| GO:0072513 | Contraction | biological_process | positive regulation of secondary heart field cardioblast proliferation | 3 | 7.43E-04 |
| GO:0030687 | Contraction | cellular_component | preribosome, large subunit precursor                                   | 3 | 7.43E-04 |
| GO:2000045 | Contraction | biological_process | regulation of G1/S transition of mitotic cell cycle                    | 3 | 7.43E-04 |
| GO:0060223 | Contraction | biological_process | retinal rod cell fate commitment                                       | 3 | 7.43E-04 |
| GO:0003420 | Contraction | biological_process | regulation of growth plate cartilage chondrocyte proliferation         | 3 | 7.43E-04 |
| GO:0072321 | Contraction | biological_process | chaperone-mediated protein transport                                   | 3 | 7.43E-04 |
| GO:0043204 | Contraction | cellular_component | perikaryon                                                             | 3 | 7.43E-04 |
| GO:0030195 | Contraction | biological_process | negative regulation of blood coagulation                               | 3 | 7.43E-04 |
| GO:0001164 | Contraction | molecular_function | RNA polymerase I CORE element sequence-specific DNA binding            | 3 | 7.43E-04 |
| GO:0060535 | Contraction | biological_process | trachea cartilage morphogenesis                                        | 3 | 7.43E-04 |
| GO:0042823 | Contraction | biological_process | pyridoxal phosphate biosynthetic process                               | 3 | 7.43E-04 |
| GO:0045725 | Contraction | biological_process | positive regulation of glycogen biosynthetic process                   | 3 | 7.43E-04 |
| GO:0008154 | Contraction | biological_process | actin polymerization or depolymerization                               | 3 | 7.43E-04 |
| GO:0021722 | Contraction | biological_process | superior olivary nucleus maturation                                    | 3 | 7.43E-04 |
| GO:0071731 | Contraction | biological_process | response to nitric oxide                                               | 3 | 7.43E-04 |
| GO:0070863 | Contraction | biological_process | positive regulation of protein exit from endoplasmic reticulum         | 3 | 7.43E-04 |
| GO:0005355 | Contraction | molecular_function | glucose transmembrane transporter activity                             | 3 | 7.43E-04 |
| GO:0050772 | Contraction | biological_process | positive regulation of axonogenesis                                    | 3 | 7.43E-04 |
| GO:0010610 | Contraction | biological_process | regulation of mRNA stability involved in response to stress            | 3 | 2.70E-03 |
| GO:0016188 | Contraction | biological_process | synaptic vesicle maturation                                            | 3 | 6.15E-03 |

|            |             |                    |                                                                                                                  |   |          |
|------------|-------------|--------------------|------------------------------------------------------------------------------------------------------------------|---|----------|
| GO:0061569 | Contraction | biological_process | UDP phosphorylation                                                                                              | 3 | 6.15E-03 |
| GO:0060285 | Contraction | biological_process | cilium-dependent cell motility                                                                                   | 3 | 6.15E-03 |
| GO:0015887 | Contraction | biological_process | pantothenate transmembrane transport                                                                             | 3 | 6.15E-03 |
| GO:0042136 | Contraction | biological_process | neurotransmitter biosynthetic process                                                                            | 3 | 6.15E-03 |
| GO:0008284 | Contraction | biological_process | positive regulation of cell proliferation                                                                        | 3 | 6.90E-03 |
| GO:0006368 | Contraction | biological_process | transcription elongation from RNA polymerase II promoter                                                         | 3 | 7.92E-03 |
| GO:1901998 | Contraction | biological_process | toxin transport                                                                                                  | 3 | 9.08E-03 |
| GO:0006915 | Contraction | biological_process | apoptotic process                                                                                                | 3 | 1.45E-02 |
| GO:0032496 | Contraction | biological_process | response to lipopolysaccharide                                                                                   | 3 | 1.76E-02 |
| GO:1990440 | Contraction | biological_process | positive regulation of transcription from RNA polymerase II promoter in response to endoplasmic reticulum stress | 3 | 1.78E-02 |
| GO:0007416 | Contraction | biological_process | synapse assembly                                                                                                 | 2 | 3.32E-03 |
| GO:0006694 | Contraction | biological_process | steroid biosynthetic process                                                                                     | 2 | 4.88E-03 |
| GO:0001501 | Contraction | biological_process | skeletal system development                                                                                      | 2 | 6.60E-03 |
| GO:0097191 | Contraction | biological_process | extrinsic apoptotic signaling pathway                                                                            | 2 | 8.23E-03 |
| GO:0050793 | Contraction | biological_process | regulation of developmental process                                                                              | 2 | 8.23E-03 |
| GO:0060179 | Contraction | biological_process | male mating behavior                                                                                             | 2 | 8.23E-03 |
| GO:0031998 | Contraction | biological_process | regulation of fatty acid beta-oxidation                                                                          | 2 | 8.23E-03 |
| GO:0006105 | Contraction | biological_process | succinate metabolic process                                                                                      | 2 | 8.23E-03 |
| GO:0016322 | Contraction | biological_process | neuron remodeling                                                                                                | 2 | 8.23E-03 |
| GO:0006396 | Contraction | biological_process | RNA processing                                                                                                   | 2 | 1.97E-02 |

**Supplementary Table 23.** Rapidly evolving gene families in Humboldt penguin



| <b>Humboldt</b> |              |                    |                                                                                                 |                      |                |
|-----------------|--------------|--------------------|-------------------------------------------------------------------------------------------------|----------------------|----------------|
| <b>GO ID</b>    | <b>Event</b> | <b>Namespace</b>   | <b>Name (Child term)</b>                                                                        | <b>Count p-value</b> | <b>p-value</b> |
| GO:0007165      | Contraction  | biological_process | signal transduction                                                                             | 38                   | 1.17E-09       |
| GO:0016021      | Contraction  | cellular_component | integral component of membrane                                                                  | 33                   | 4.24E-11       |
| GO:0006511      | Contraction  | biological_process | ubiquitin-dependent protein catabolic process                                                   | 32                   | 1.04E-03       |
| GO:0046872      | Contraction  | molecular_function | metal ion binding                                                                               | 29                   | 8.66E-03       |
| GO:0044826      | Contraction  | biological_process | viral genome integration into host DNA                                                          | 28                   | 4.11E-15       |
| GO:0006355      | Contraction  | biological_process | regulation of transcription, DNA-templated                                                      | 21                   | 1.32E-04       |
| GO:0051453      | Contraction  | biological_process | regulation of intracellular pH                                                                  | 17                   | 1.68E-16       |
| GO:0002250      | Contraction  | biological_process | adaptive immune response                                                                        | 16                   | 2.92E-14       |
| GO:0007155      | Contraction  | biological_process | cell adhesion                                                                                   | 15                   | 1.94E-02       |
| GO:0007283      | Contraction  | biological_process | spermatogenesis                                                                                 | 14                   | 1.54E-06       |
| GO:0006313      | Contraction  | biological_process | transposition, DNA-mediated                                                                     | 13                   | 1.50E-10       |
| GO:0007018      | Contraction  | biological_process | microtubule-based movement                                                                      | 13                   | 1.18E-03       |
| GO:0061408      | Contraction  | biological_process | positive regulation of transcription from RNA polymerase II promoter in response to heat stress | 10                   | 4.41E-07       |
| GO:0006885      | Contraction  | biological_process | regulation of pH                                                                                | 9                    | 3.87E-09       |
| GO:0051607      | Contraction  | biological_process | defense response to virus                                                                       | 9                    | 2.24E-06       |
| GO:0051932      | Contraction  | biological_process | synaptic transmission, GABAergic                                                                | 9                    | 9.51E-03       |
| GO:0016055      | Contraction  | biological_process | Wnt signaling pathway                                                                           | 8                    | 1.97E-10       |
| GO:0010447      | Contraction  | biological_process | response to acidic pH                                                                           | 8                    | 4.93E-08       |
| GO:0002009      | Contraction  | biological_process | morphogenesis of an epithelium                                                                  | 8                    | 3.36E-06       |
| GO:0009791      | Contraction  | biological_process | post-embryonic development                                                                      | 8                    | 1.12E-05       |
| GO:0039702      | Contraction  | biological_process | viral budding via host ESCRT complex                                                            | 8                    | 2.23E-05       |

|            |             |                    |                                                                      |   |          |
|------------|-------------|--------------------|----------------------------------------------------------------------|---|----------|
| GO:0051603 | Contraction | biological_process | proteolysis involved in cellular protein catabolic process           | 8 | 7.77E-03 |
| GO:0051492 | Contraction | biological_process | regulation of stress fiber assembly                                  | 7 | 7.03E-06 |
| GO:0006366 | Contraction | biological_process | transcription from RNA polymerase II promoter                        | 7 | 1.01E-03 |
| GO:0048167 | Contraction | biological_process | regulation of synaptic plasticity                                    | 7 | 1.14E-02 |
| GO:0007034 | Contraction | biological_process | vacuolar transport                                                   | 6 | 8.01E-04 |
| GO:0034765 | Contraction | biological_process | regulation of ion transmembrane transport                            | 6 | 1.96E-02 |
| GO:0033993 | Contraction | biological_process | response to lipid                                                    | 5 | 3.78E-07 |
| GO:0016592 | Contraction | cellular_component | mediator complex                                                     | 5 | 3.78E-07 |
| GO:0048660 | Contraction | biological_process | regulation of smooth muscle cell proliferation                       | 5 | 3.78E-07 |
| GO:0045944 | Contraction | biological_process | positive regulation of transcription from RNA polymerase II promoter | 5 | 1.02E-06 |
| GO:0035282 | Contraction | biological_process | segmentation                                                         | 5 | 7.14E-06 |
| GO:0030208 | Contraction | biological_process | dermatan sulfate biosynthetic process                                | 5 | 7.32E-05 |
| GO:0006364 | Contraction | biological_process | rRNA processing                                                      | 5 | 1.22E-04 |
| GO:0005978 | Contraction | biological_process | glycogen biosynthetic process                                        | 5 | 6.71E-04 |
| GO:0016973 | Contraction | biological_process | poly(A)+ mRNA export from nucleus                                    | 5 | 1.63E-03 |
| GO:0008234 | Contraction | molecular_function | cysteine-type peptidase activity                                     | 5 | 2.66E-03 |
| GO:0043149 | Contraction | biological_process | stress fiber assembly                                                | 5 | 4.93E-03 |
| GO:0042060 | Contraction | biological_process | wound healing                                                        | 5 | 8.09E-03 |
| GO:0031514 | Contraction | cellular_component | motile cilium                                                        | 5 | 8.23E-03 |
| GO:0002040 | Contraction | biological_process | sprouting angiogenesis                                               | 5 | 8.23E-03 |
| GO:0021762 | Contraction | biological_process | substantia nigra development                                         | 5 | 2.05E-02 |
| GO:0005509 | Contraction | molecular_function | calcium ion binding                                                  | 5 | 2.47E-02 |
| GO:0006556 | Contraction | biological_process | S-adenosylmethionine biosynthetic process                            | 4 | 7.11E-04 |
| GO:0007016 | Contraction | biological_process | cytoskeletal anchoring at plasma membrane                            | 4 | 4.34E-03 |

|            |             |                    |                                                                    |   |          |
|------------|-------------|--------------------|--------------------------------------------------------------------|---|----------|
| GO:0060314 | Contraction | biological_process | regulation of ryanodine-sensitive calcium-release channel activity | 4 | 4.34E-03 |
| GO:0007169 | Contraction | biological_process | transmembrane receptor protein tyrosine kinase signaling pathway   | 4 | 9.06E-03 |
| GO:0007601 | Contraction | biological_process | visual perception                                                  | 3 | 6.95E-14 |
| GO:0006357 | Contraction | biological_process | regulation of transcription from RNA polymerase II promoter        | 3 | 6.04E-12 |
| GO:0016192 | Contraction | biological_process | vesicle-mediated transport                                         | 3 | 8.38E-11 |
| GO:0006412 | Contraction | biological_process | translation                                                        | 3 | 1.19E-08 |
| GO:0008380 | Contraction | biological_process | RNA splicing                                                       | 3 | 4.52E-07 |
| GO:0008270 | Contraction | molecular_function | zinc ion binding                                                   | 3 | 1.83E-05 |
| GO:0003723 | Contraction | molecular_function | RNA binding                                                        | 3 | 2.12E-05 |
| GO:0045893 | Contraction | biological_process | positive regulation of transcription, DNA-templated                | 3 | 1.13E-04 |
| GO:1902775 | Contraction | biological_process | mitochondrial large ribosomal subunit assembly                     | 3 | 1.42E-04 |
| GO:0060541 | Contraction | biological_process | respiratory system development                                     | 3 | 1.42E-04 |
| GO:0003431 | Contraction | biological_process | growth plate cartilage chondrocyte development                     | 3 | 1.42E-04 |
| GO:1901082 | Contraction | biological_process | positive regulation of relaxation of smooth muscle                 | 3 | 1.42E-04 |
| GO:0046889 | Contraction | biological_process | positive regulation of lipid biosynthetic process                  | 3 | 1.42E-04 |
| GO:0070508 | Contraction | biological_process | cholesterol import                                                 | 3 | 1.42E-04 |
| GO:0010765 | Contraction | biological_process | positive regulation of sodium ion transport                        | 3 | 1.42E-04 |
| GO:0006351 | Contraction | biological_process | transcription, DNA-templated                                       | 3 | 4.33E-04 |
| GO:0035745 | Contraction | biological_process | T-helper 2 cell cytokine production                                | 3 | 5.40E-04 |
| GO:0046549 | Contraction | biological_process | retinal cone cell development                                      | 3 | 1.28E-03 |
| GO:0046328 | Contraction | biological_process | regulation of JNK cascade                                          | 3 | 1.28E-03 |
| GO:1903861 | Contraction | biological_process | positive regulation of dendrite extension                          | 3 | 2.43E-03 |
| GO:0006979 | Contraction | biological_process | response to oxidative stress                                       | 3 | 3.79E-03 |

|            |             |                    |                                                                                       |   |          |
|------------|-------------|--------------------|---------------------------------------------------------------------------------------|---|----------|
| GO:0007186 | Contraction | biological_process | G-protein coupled receptor signaling pathway                                          | 3 | 5.47E-03 |
| GO:0010867 | Contraction | biological_process | positive regulation of triglyceride biosynthetic process                              | 3 | 6.11E-03 |
| GO:0034497 | Contraction | biological_process | protein localization to pre-autophagosomal structure                                  | 3 | 6.11E-03 |
| GO:1901329 | Contraction | biological_process | regulation of odontoblast differentiation                                             | 3 | 6.11E-03 |
| GO:0006409 | Contraction | biological_process | tRNA export from nucleus                                                              | 3 | 6.11E-03 |
| GO:0030433 | Contraction | biological_process | ER-associated ubiquitin-dependent protein catabolic process                           | 3 | 7.54E-03 |
| GO:0051260 | Contraction | biological_process | protein homooligomerization                                                           | 3 | 1.25E-02 |
| GO:0004129 | Contraction | molecular_function | cytochrome-c oxidase activity                                                         | 3 | 1.94E-02 |
| GO:0009268 | Contraction | biological_process | response to pH                                                                        | 3 | 1.94E-02 |
| GO:0036295 | Contraction | biological_process | cellular response to increased oxygen levels                                          | 3 | 2.39E-02 |
| GO:0043393 | Contraction | biological_process | regulation of protein binding                                                         | 3 | 2.39E-02 |
| GO:0015031 | Contraction | biological_process | protein transport                                                                     | 2 | 5.20E-13 |
| GO:0005576 | Contraction | cellular_component | extracellular region                                                                  | 2 | 1.44E-04 |
| GO:0007608 | Contraction | biological_process | sensory perception of smell                                                           | 2 | 7.05E-04 |
| GO:1903818 | Contraction | biological_process | positive regulation of voltage-gated potassium channel activity                       | 2 | 2.74E-03 |
| GO:0015826 | Contraction | biological_process | threonine transport                                                                   | 2 | 2.74E-03 |
| GO:0032648 | Contraction | biological_process | regulation of interferon-beta production                                              | 2 | 2.74E-03 |
| GO:0048037 | Contraction | molecular_function | cofactor binding                                                                      | 2 | 2.74E-03 |
| GO:0060976 | Contraction | biological_process | coronary vasculature development                                                      | 2 | 2.74E-03 |
| GO:0016616 | Contraction | molecular_function | oxidoreductase activity, acting on the CH-OH group of donors, NAD or NADP as acceptor | 2 | 7.79E-03 |
| GO:0003823 | Contraction | molecular_function | antigen binding                                                                       | 2 | 2.33E-02 |
| GO:1900746 | Contraction | biological_process | regulation of vascular endothelial growth factor signaling pathway                    | 2 | 2.33E-02 |

**Supplementary Table 24. Rapidly losses gene families in Magellanic penguin.**

| Magellanic |           |                    |                                                                      |       |          |
|------------|-----------|--------------------|----------------------------------------------------------------------|-------|----------|
| GO ID      | Event     | Namespace          | Name (Child term)                                                    | Count | p-value  |
| GO:0006334 | Expansion | biological_process | nucleosome assembly                                                  | 92    | 2.38E-94 |
| GO:0005200 | Expansion | molecular_function | structural constituent of cytoskeleton                               | 82    | 3.81E-44 |
| GO:0006355 | Expansion | biological_process | regulation of transcription, DNA-templated                           | 57    | 1.96E-02 |
| GO:0006511 | Expansion | biological_process | ubiquitin-dependent protein catabolic process                        | 46    | 8.20E-03 |
| GO:0006325 | Expansion | biological_process | chromatin organization                                               | 34    | 3.95E-20 |
| GO:0016032 | Expansion | biological_process | viral process                                                        | 29    | 2.51E-03 |
| GO:0016055 | Expansion | biological_process | Wnt signaling pathway                                                | 27    | 3.53E-04 |
| GO:0003774 | Expansion | molecular_function | motor activity                                                       | 25    | 5.96E-08 |
| GO:0015031 | Expansion | biological_process | protein transport                                                    | 25    | 4.34E-03 |
| GO:0050776 | Expansion | biological_process | regulation of immune response                                        | 22    | 1.50E-09 |
| GO:0000122 | Expansion | biological_process | negative regulation of transcription from RNA polymerase II promoter | 22    | 4.70E-03 |
| GO:0061038 | Expansion | biological_process | uterus morphogenesis                                                 | 21    | 2.41E-20 |
| GO:0006890 | Expansion | biological_process | retrograde vesicle-mediated transport, Golgi to ER                   | 21    | 3.19E-04 |
| GO:0006412 | Expansion | biological_process | translation                                                          | 21    | 1.97E-02 |
| GO:0046872 | Expansion | molecular_function | metal ion binding                                                    | 20    | 8.38E-08 |
| GO:0030433 | Expansion | biological_process | ER-associated ubiquitin-dependent protein catabolic process          | 20    | 6.09E-03 |
| GO:0007283 | Expansion | biological_process | spermatogenesis                                                      | 19    | 2.52E-02 |
| GO:0007525 | Expansion | biological_process | somatic muscle development                                           | 18    | 2.05E-11 |
| GO:0060412 | Expansion | biological_process | ventricular septum morphogenesis                                     | 18    | 6.82E-07 |
| GO:2000300 | Expansion | biological_process | regulation of synaptic vesicle exocytosis                            | 16    | 2.12E-06 |
| GO:0006357 | Expansion | biological_process | regulation of transcription from RNA polymerase II promoter          | 15    | 2.20E-06 |

|            |           |                    |                                                                      |    |          |
|------------|-----------|--------------------|----------------------------------------------------------------------|----|----------|
| GO:0002244 | Expansion | biological_process | hematopoietic progenitor cell differentiation                        | 14 | 7.75E-09 |
| GO:0048741 | Expansion | biological_process | skeletal muscle fiber development                                    | 14 | 2.19E-07 |
| GO:0008380 | Expansion | biological_process | RNA splicing                                                         | 14 | 4.01E-03 |
| GO:0007165 | Expansion | biological_process | signal transduction                                                  | 13 | 5.13E-35 |
| GO:0003677 | Expansion | molecular_function | DNA binding                                                          | 13 | 1.08E-03 |
| GO:0006904 | Expansion | biological_process | vesicle docking involved in exocytosis                               | 13 | 4.46E-03 |
| GO:0004111 | Expansion | molecular_function | creatine kinase activity                                             | 12 | 3.37E-15 |
| GO:0010142 | Expansion | biological_process | farnesyl diphosphate biosynthetic process, mevalonate pathway        | 12 | 3.37E-15 |
| GO:0004849 | Expansion | molecular_function | uridine kinase activity                                              | 12 | 3.37E-15 |
| GO:0016567 | Expansion | biological_process | protein ubiquitination                                               | 12 | 6.74E-05 |
| GO:0030100 | Expansion | biological_process | regulation of endocytosis                                            | 12 | 8.29E-05 |
| GO:0007601 | Expansion | biological_process | visual perception                                                    | 11 | 2.15E-10 |
| GO:0030335 | Expansion | biological_process | positive regulation of cell migration                                | 11 | 5.12E-06 |
| GO:0006366 | Expansion | biological_process | transcription from RNA polymerase II promoter                        | 11 | 2.60E-03 |
| GO:0007015 | Expansion | biological_process | actin filament organization                                          | 10 | 1.99E-09 |
| GO:0051321 | Expansion | biological_process | meiotic cell cycle                                                   | 10 | 1.07E-05 |
| GO:0061097 | Expansion | biological_process | regulation of protein tyrosine kinase activity                       | 9  | 1.48E-11 |
| GO:0016192 | Expansion | biological_process | vesicle-mediated transport                                           | 9  | 1.31E-08 |
| GO:0045944 | Expansion | biological_process | positive regulation of transcription from RNA polymerase II promoter | 9  | 4.04E-06 |
| GO:0051607 | Expansion | biological_process | defense response to virus                                            | 9  | 1.10E-05 |
| GO:0038123 | Expansion | biological_process | toll-like receptor TLR1:TLR2 signaling pathway                       | 8  | 2.41E-10 |
| GO:0007605 | Expansion | biological_process | sensory perception of sound                                          | 8  | 5.08E-03 |
| GO:0005634 | Expansion | cellular_component | nucleus                                                              | 8  | 5.49E-03 |
| GO:0050852 | Expansion | biological_process | T cell receptor signaling pathway                                    | 8  | 1.41E-02 |
| GO:0006897 | Expansion | biological_process | endocytosis                                                          | 8  | 1.45E-02 |
| GO:0016021 | Expansion | cellular_component | integral component of membrane                                       | 7  | 2.85E-40 |
| GO:0042450 | Expansion | biological_process | arginine biosynthetic process via ornithine                          | 7  | 3.90E-09 |

|            |           |                    |                                                                                     |   |          |
|------------|-----------|--------------------|-------------------------------------------------------------------------------------|---|----------|
| GO:0034632 | Expansion | molecular_function | retinol transporter activity                                                        | 7 | 3.90E-09 |
| GO:0060819 | Expansion | biological_process | inactivation of X chromosome by genetic imprinting                                  | 7 | 3.90E-09 |
| GO:0007140 | Expansion | biological_process | male meiosis                                                                        | 7 | 3.90E-09 |
| GO:0035498 | Expansion | biological_process | carosine metabolic process                                                          | 7 | 3.90E-09 |
| GO:0007276 | Expansion | biological_process | gamete generation                                                                   | 7 | 3.90E-09 |
| GO:0010818 | Expansion | biological_process | T cell chemotaxis                                                                   | 7 | 1.24E-07 |
| GO:0035360 | Expansion | biological_process | positive regulation of peroxisome proliferator activated receptor signaling pathway | 7 | 2.24E-06 |
| GO:0006777 | Expansion | biological_process | Mo-molybdopterin cofactor biosynthetic process                                      | 7 | 2.24E-06 |
| GO:0060261 | Expansion | biological_process | positive regulation of transcription initiation from RNA polymerase II promoter     | 7 | 2.24E-06 |
| GO:0045773 | Expansion | biological_process | positive regulation of axon extension                                               | 7 | 2.24E-06 |
| GO:0070904 | Expansion | biological_process | transepithelial L-ascorbic acid transport                                           | 7 | 1.51E-05 |
| GO:0048845 | Expansion | biological_process | venous blood vessel morphogenesis                                                   | 7 | 4.00E-05 |
| GO:0055012 | Expansion | biological_process | ventricular cardiac muscle cell differentiation                                     | 7 | 4.00E-05 |
| GO:0051382 | Expansion | biological_process | kinetochore assembly                                                                | 7 | 4.00E-05 |
| GO:0004386 | Expansion | molecular_function | helicase activity                                                                   | 7 | 6.15E-05 |
| GO:0006471 | Expansion | biological_process | protein ADP-ribosylation                                                            | 7 | 6.15E-05 |
| GO:0019731 | Expansion | biological_process | antibacterial humoral response                                                      | 7 | 1.32E-04 |
| GO:0002009 | Expansion | biological_process | morphogenesis of an epithelium                                                      | 7 | 1.32E-04 |
| GO:0007034 | Expansion | biological_process | vacuolar transport                                                                  | 7 | 3.44E-04 |
| GO:0071277 | Expansion | biological_process | cellular response to calcium ion                                                    | 7 | 7.61E-04 |
| GO:0097428 | Expansion | biological_process | protein maturation by iron-sulfur cluster transfer                                  | 7 | 2.65E-03 |
| GO:1901796 | Expansion | biological_process | regulation of signal transduction by p53 class mediator                             | 7 | 3.72E-03 |
| GO:0018105 | Expansion | biological_process | peptidyl-serine phosphorylation                                                     | 7 | 4.36E-03 |
| GO:0001659 | Expansion | biological_process | temperature homeostasis                                                             | 7 | 5.87E-03 |
| GO:0043627 | Expansion | biological_process | response to estrogen                                                                | 7 | 7.71E-03 |
| GO:0001944 | Expansion | biological_process | vasculature development                                                             | 7 | 7.71E-03 |

|            |           |                    |                                                                                    |   |          |
|------------|-----------|--------------------|------------------------------------------------------------------------------------|---|----------|
| GO:0006479 | Expansion | biological_process | protein methylation                                                                | 7 | 8.76E-03 |
| GO:0019058 | Expansion | biological_process | viral life cycle                                                                   | 7 | 1.54E-02 |
| GO:0009408 | Expansion | biological_process | response to heat                                                                   | 7 | 1.88E-02 |
| GO:0045892 | Expansion | biological_process | negative regulation of transcription, DNA-templated                                | 7 | 2.50E-02 |
| GO:0016485 | Expansion | biological_process | protein processing                                                                 | 7 | 2.67E-02 |
| GO:0060078 | Expansion | biological_process | regulation of postsynaptic membrane potential                                      | 6 | 6.28E-08 |
| GO:0005886 | Expansion | cellular_component | plasma membrane                                                                    | 6 | 1.23E-03 |
| GO:0052689 | Expansion | molecular_function | carboxylic ester hydrolase activity                                                | 6 | 3.28E-03 |
| GO:0043565 | Expansion | molecular_function | sequence-specific DNA binding                                                      | 6 | 1.58E-02 |
| GO:0003016 | Expansion | biological_process | respiratory system process                                                         | 5 | 1.01E-06 |
| GO:0045429 | Expansion | biological_process | positive regulation of nitric oxide biosynthetic process                           | 5 | 1.01E-06 |
| GO:0007188 | Expansion | biological_process | adenylate cyclase-modulating G-protein coupled receptor signaling pathway          | 5 | 1.01E-06 |
| GO:0010863 | Expansion | biological_process | positive regulation of phospholipase C activity                                    | 5 | 1.01E-06 |
| GO:0060158 | Expansion | biological_process | phospholipase C-activating dopamine receptor signaling pathway                     | 5 | 1.01E-06 |
| GO:0010971 | Expansion | biological_process | positive regulation of G2/M transition of mitotic cell cycle                       | 5 | 1.01E-06 |
| GO:0008270 | Expansion | molecular_function | zinc ion binding                                                                   | 5 | 1.71E-05 |
| GO:0046034 | Expansion | biological_process | ATP metabolic process                                                              | 5 | 9.81E-05 |
| GO:0006937 | Expansion | biological_process | regulation of muscle contraction                                                   | 5 | 1.84E-04 |
| GO:0021978 | Expansion | biological_process | telencephalon regionalization                                                      | 5 | 1.84E-04 |
| GO:0060510 | Expansion | biological_process | Type II pneumocyte differentiation                                                 | 5 | 1.84E-04 |
| GO:2000582 | Expansion | biological_process | positive regulation of ATP-dependent microtubule motor activity, plus-end-directed | 5 | 1.13E-03 |
| GO:0001504 | Expansion | biological_process | neurotransmitter uptake                                                            | 5 | 1.13E-03 |
| GO:1903358 | Expansion | biological_process | regulation of Golgi organization                                                   | 5 | 1.59E-03 |
| GO:0071805 | Expansion | biological_process | potassium ion transmembrane transport                                              | 5 | 2.16E-03 |
| GO:0045202 | Expansion | cellular_component | synapse                                                                            | 5 | 4.74E-03 |
| GO:0046982 | Expansion | molecular_function | protein heterodimerization activity                                                | 5 | 7.30E-03 |



|            |           |                    |                                                                         |   |          |
|------------|-----------|--------------------|-------------------------------------------------------------------------|---|----------|
| GO:0006936 | Expansion | biological_process | muscle contraction                                                      | 5 | 1.06E-02 |
| GO:0031098 | Expansion | biological_process | stress-activated protein kinase signaling cascade                       | 5 | 1.20E-02 |
| GO:0032434 | Expansion | biological_process | regulation of proteasomal ubiquitin-dependent protein catabolic process | 5 | 1.25E-02 |
| GO:0016239 | Expansion | biological_process | positive regulation of macroautophagy                                   | 5 | 1.47E-02 |
| GO:0040020 | Expansion | biological_process | regulation of meiotic nuclear division                                  | 4 | 1.61E-05 |
| GO:0006434 | Expansion | biological_process | seryl-tRNA aminoacylation                                               | 4 | 1.61E-05 |
| GO:0060048 | Expansion | biological_process | cardiac muscle contraction                                              | 4 | 1.61E-05 |
| GO:0061563 | Expansion | biological_process | trigeminal ganglion structural organization                             | 4 | 1.61E-05 |
| GO:0019511 | Expansion | biological_process | peptidyl-proline hydroxylation                                          | 4 | 1.61E-05 |
| GO:0060322 | Expansion | biological_process | head development                                                        | 4 | 1.61E-05 |
| GO:0001975 | Expansion | biological_process | response to amphetamine                                                 | 4 | 8.69E-04 |
| GO:0007214 | Expansion | biological_process | gamma-aminobutyric acid signaling pathway                               | 4 | 1.47E-03 |
| GO:0007522 | Expansion | biological_process | visceral muscle development                                             | 4 | 1.47E-03 |
| GO:0031957 | Expansion | molecular_function | very long-chain fatty acid-CoA ligase activity                          | 4 | 3.37E-03 |
| GO:0007156 | Expansion | biological_process | homophilic cell adhesion via plasma membrane adhesion molecules         | 4 | 4.10E-03 |
| GO:0007399 | Expansion | biological_process | nervous system development                                              | 4 | 5.67E-03 |
| GO:0008217 | Expansion | biological_process | regulation of blood pressure                                            | 4 | 8.42E-03 |
| GO:0051496 | Expansion | biological_process | positive regulation of stress fiber assembly                            | 4 | 8.42E-03 |
| GO:0048515 | Expansion | biological_process | spermatid differentiation                                               | 4 | 8.42E-03 |
| GO:0061032 | Expansion | biological_process | visceral serous pericardium development                                 | 4 | 1.08E-02 |
| GO:0016226 | Expansion | biological_process | iron-sulfur cluster assembly                                            | 4 | 2.36E-02 |
| GO:0030278 | Expansion | biological_process | regulation of ossification                                              | 3 | 2.56E-04 |
| GO:0006468 | Expansion | biological_process | protein phosphorylation                                                 | 3 | 2.59E-03 |
| GO:0014029 | Expansion | biological_process | neural crest formation                                                  | 3 | 1.03E-02 |
| GO:0061551 | Expansion | biological_process | trigeminal ganglion development                                         | 3 | 1.03E-02 |
| GO:0048168 | Expansion | biological_process | regulation of neuronal synaptic plasticity                              | 3 | 1.45E-02 |
| GO:0007179 | Expansion | biological_process | transforming growth factor beta receptor signaling pathway              | 2 | 7.73E-05 |

|            |           |                    |                                          |   |          |
|------------|-----------|--------------------|------------------------------------------|---|----------|
| GO:0048384 | Expansion | biological_process | retinoic acid receptor signaling pathway | 2 | 4.04E-03 |
| GO:0072560 | Expansion | biological_process | type B pancreatic cell maturation        | 2 | 4.04E-03 |
| GO:0007603 | Expansion | biological_process | phototransduction, visible light         | 2 | 4.04E-03 |
| GO:0010762 | Expansion | biological_process | regulation of fibroblast migration       | 2 | 4.04E-03 |
| GO:0048511 | Expansion | biological_process | rhythmic process                         | 2 | 2.28E-02 |

**Supplementary Table 25. Rapidly losses gene families in African penguin.**

| <b>African</b> |              |                    |                                                                 |                      |                |
|----------------|--------------|--------------------|-----------------------------------------------------------------|----------------------|----------------|
| <b>GO ID</b>   | <b>Event</b> | <b>Namespace</b>   | <b>Name (Child term)</b>                                        | <b>Count p-value</b> | <b>p-value</b> |
| GO:0006334     | Contraction  | biological_process | nucleosome assembly                                             | 92                   | 2.03E-77       |
| GO:0007165     | Contraction  | biological_process | signal transduction                                             | 54                   | 6.99E-22       |
| GO:0006814     | Contraction  | biological_process | sodium ion transport                                            | 40                   | 2.15E-05       |
| GO:0046872     | Contraction  | molecular_function | metal ion binding                                               | 28                   | 7.87E-11       |
| GO:0007156     | Contraction  | biological_process | homophilic cell adhesion via plasma membrane adhesion molecules | 28                   | 2.30E-03       |
| GO:0006325     | Contraction  | biological_process | chromatin organization                                          | 27                   | 1.20E-09       |
| GO:0003774     | Contraction  | molecular_function | motor activity                                                  | 25                   | 3.51E-05       |
| GO:0006357     | Contraction  | biological_process | regulation of transcription from RNA polymerase II promoter     | 23                   | 8.07E-08       |
| GO:0007601     | Contraction  | biological_process | visual perception                                               | 22                   | 1.31E-10       |
| GO:0006366     | Contraction  | biological_process | transcription from RNA polymerase II promoter                   | 22                   | 1.47E-02       |
| GO:0016021     | Contraction  | cellular_component | integral component of membrane                                  | 21                   | 6.44E-45       |
| GO:0006511     | Contraction  | biological_process | ubiquitin-dependent protein catabolic process                   | 21                   | 4.74E-21       |

|            |             |                    |                                                                                                 |    |          |
|------------|-------------|--------------------|-------------------------------------------------------------------------------------------------|----|----------|
| GO:0050776 | Contraction | biological_process | regulation of immune response                                                                   | 21 | 3.40E-06 |
| GO:0007283 | Contraction | biological_process | spermatogenesis                                                                                 | 18 | 5.81E-14 |
| GO:0016032 | Contraction | biological_process | viral process                                                                                   | 18 | 1.94E-13 |
| GO:0007525 | Contraction | biological_process | somatic muscle development                                                                      | 18 | 6.82E-09 |
| GO:0016567 | Contraction | biological_process | protein ubiquitination                                                                          | 14 | 6.58E-08 |
| GO:0045944 | Contraction | biological_process | positive regulation of transcription from RNA polymerase II promoter                            | 13 | 4.01E-08 |
| GO:0008270 | Contraction | molecular_function | zinc ion binding                                                                                | 13 | 2.00E-04 |
| GO:0016192 | Contraction | biological_process | vesicle-mediated transport                                                                      | 11 | 4.28E-13 |
| GO:0030335 | Contraction | biological_process | positive regulation of cell migration                                                           | 11 | 1.31E-04 |
| GO:0045893 | Contraction | biological_process | positive regulation of transcription, DNA-templated                                             | 11 | 3.24E-04 |
| GO:0048741 | Contraction | biological_process | skeletal muscle fiber development                                                               | 11 | 1.04E-03 |
| GO:0051225 | Contraction | biological_process | spindle assembly                                                                                | 11 | 1.44E-02 |
| GO:0001916 | Contraction | biological_process | positive regulation of T cell mediated cytotoxicity                                             | 10 | 6.15E-08 |
| GO:0061408 | Contraction | biological_process | positive regulation of transcription from RNA polymerase II promoter in response to heat stress | 10 | 5.71E-05 |
| GO:0051321 | Contraction | biological_process | meiotic cell cycle                                                                              | 10 | 2.07E-04 |
| GO:0006351 | Contraction | biological_process | transcription, DNA-templated                                                                    | 10 | 7.42E-04 |
| GO:0061097 | Contraction | biological_process | regulation of protein tyrosine kinase activity                                                  | 9  | 3.68E-10 |
| GO:0005200 | Contraction | molecular_function | structural constituent of cytoskeleton                                                          | 9  | 8.33E-04 |
| GO:0005509 | Contraction | molecular_function | calcium ion binding                                                                             | 9  | 5.34E-03 |
| GO:0006468 | Contraction | biological_process | protein phosphorylation                                                                         | 9  | 2.06E-02 |
| GO:0060236 | Contraction | biological_process | regulation of mitotic spindle organization                                                      | 8  | 6.74E-03 |
| GO:0006068 | Contraction | biological_process | ethanol catabolic process                                                                       | 7  | 4.69E-08 |
| GO:0007140 | Contraction | biological_process | male meiosis                                                                                    | 7  | 4.69E-08 |
| GO:0005634 | Contraction | cellular_component | nucleus                                                                                         | 7  | 1.15E-05 |

|            |             |                    |                                                                           |   |          |
|------------|-------------|--------------------|---------------------------------------------------------------------------|---|----------|
| GO:0051492 | Contraction | biological_process | regulation of stress fiber assembly                                       | 7 | 2.32E-04 |
| GO:0007169 | Contraction | biological_process | transmembrane receptor protein tyrosine kinase signaling pathway          | 7 | 6.96E-04 |
| GO:0009617 | Contraction | biological_process | response to bacterium                                                     | 7 | 2.14E-03 |
| GO:0006412 | Contraction | biological_process | translation                                                               | 6 | 1.28E-13 |
| GO:0045599 | Contraction | biological_process | negative regulation of fat cell differentiation                           | 6 | 1.53E-04 |
| GO:0000122 | Contraction | biological_process | negative regulation of transcription from RNA polymerase II promoter      | 6 | 2.69E-04 |
| GO:0006890 | Contraction | biological_process | retrograde vesicle-mediated transport, Golgi to ER                        | 6 | 7.43E-03 |
| GO:0001570 | Contraction | biological_process | vasculogenesis                                                            | 6 | 1.52E-02 |
| GO:0003016 | Contraction | biological_process | respiratory system process                                                | 5 | 5.91E-06 |
| GO:0045429 | Contraction | biological_process | positive regulation of nitric oxide biosynthetic process                  | 5 | 5.91E-06 |
| GO:0007188 | Contraction | biological_process | adenylate cyclase-modulating G-protein coupled receptor signaling pathway | 5 | 5.91E-06 |
| GO:0010814 | Contraction | biological_process | substance P catabolic process                                             | 5 | 5.91E-06 |
| GO:0030850 | Contraction | biological_process | prostate gland development                                                | 5 | 5.91E-06 |
| GO:0031098 | Contraction | biological_process | stress-activated protein kinase signaling cascade                         | 5 | 3.34E-04 |
| GO:0046883 | Contraction | biological_process | regulation of hormone secretion                                           | 5 | 9.33E-04 |
| GO:0035751 | Contraction | biological_process | regulation of lysosomal lumen pH                                          | 5 | 9.33E-04 |
| GO:0006776 | Contraction | biological_process | vitamin A metabolic process                                               | 5 | 9.33E-04 |
| GO:0051493 | Contraction | biological_process | regulation of cytoskeleton organization                                   | 5 | 9.33E-04 |
| GO:0009651 | Contraction | biological_process | response to salt stress                                                   | 5 | 9.33E-04 |
| GO:0005978 | Contraction | biological_process | glycogen biosynthetic process                                             | 5 | 6.96E-03 |
| GO:0050871 | Contraction | biological_process | positive regulation of B cell activation                                  | 5 | 1.19E-02 |
| GO:0050852 | Contraction | biological_process | T cell receptor signaling pathway                                         | 4 | 1.04E-06 |
| GO:0006979 | Contraction | biological_process | response to oxidative stress                                              | 4 | 2.35E-05 |

|            |             |                    |                                                          |   |          |
|------------|-------------|--------------------|----------------------------------------------------------|---|----------|
| GO:0040020 | Contraction | biological_process | regulation of meiotic nuclear division                   | 4 | 6.60E-05 |
| GO:0051787 | Contraction | molecular_function | misfolded protein binding                                | 4 | 6.60E-05 |
| GO:0045663 | Contraction | biological_process | positive regulation of myoblast differentiation          | 4 | 6.60E-05 |
| GO:0006434 | Contraction | biological_process | seryl-tRNA aminoacylation                                | 4 | 6.60E-05 |
| GO:0016486 | Contraction | biological_process | peptide hormone processing                               | 4 | 6.60E-05 |
| GO:0061563 | Contraction | biological_process | trigeminal ganglion structural organization              | 4 | 6.60E-05 |
| GO:0004714 | Contraction | molecular_function | transmembrane receptor protein tyrosine kinase activity  | 4 | 6.60E-05 |
| GO:0060285 | Contraction | biological_process | cilium-dependent cell motility                           | 4 | 3.01E-04 |
| GO:0042147 | Contraction | biological_process | retrograde transport, endosome to Golgi                  | 4 | 6.75E-04 |
| GO:0061630 | Contraction | molecular_function | ubiquitin protein ligase activity                        | 4 | 5.21E-03 |
| GO:0006556 | Contraction | biological_process | S-adenosylmethionine biosynthetic process                | 4 | 5.21E-03 |
| GO:0007214 | Contraction | biological_process | gamma-aminobutyric acid signaling pathway                | 4 | 5.21E-03 |
| GO:0007522 | Contraction | biological_process | visceral muscle development                              | 4 | 5.21E-03 |
| GO:0050690 | Contraction | biological_process | regulation of defense response to virus by virus         | 4 | 5.21E-03 |
| GO:0007286 | Contraction | biological_process | spermatid development                                    | 4 | 1.48E-02 |
| GO:0016055 | Contraction | biological_process | Wnt signaling pathway                                    | 3 | 1.80E-28 |
| GO:0015031 | Contraction | biological_process | protein transport                                        | 3 | 1.02E-22 |
| GO:0008380 | Contraction | biological_process | RNA splicing                                             | 3 | 1.02E-13 |
| GO:0006508 | Contraction | biological_process | proteolysis                                              | 3 | 7.27E-13 |
| GO:0005886 | Contraction | cellular_component | plasma membrane                                          | 3 | 3.03E-08 |
| GO:0055085 | Contraction | biological_process | transmembrane transport                                  | 3 | 1.27E-07 |
| GO:0007275 | Contraction | biological_process | multicellular organismal development                     | 3 | 1.39E-07 |
| GO:0006367 | Contraction | biological_process | transcription initiation from RNA polymerase II promoter | 3 | 5.34E-06 |
| GO:0006477 | Contraction | biological_process | protein sulfation                                        | 3 | 7.36E-04 |

|            |             |                    |                                                                        |   |          |
|------------|-------------|--------------------|------------------------------------------------------------------------|---|----------|
| GO:0030201 | Contraction | biological_process | heparan sulfate proteoglycan metabolic process                         | 3 | 7.36E-04 |
| GO:0072513 | Contraction | biological_process | positive regulation of secondary heart field cardioblast proliferation | 3 | 7.36E-04 |
| GO:0030687 | Contraction | cellular_component | preribosome, large subunit precursor                                   | 3 | 7.36E-04 |
| GO:2000045 | Contraction | biological_process | regulation of G1/S transition of mitotic cell cycle                    | 3 | 7.36E-04 |
| GO:0060223 | Contraction | biological_process | retinal rod cell fate commitment                                       | 3 | 7.36E-04 |
| GO:0046889 | Contraction | biological_process | positive regulation of lipid biosynthetic process                      | 3 | 7.36E-04 |
| GO:0003420 | Contraction | biological_process | regulation of growth plate cartilage chondrocyte proliferation         | 3 | 7.36E-04 |
| GO:0072321 | Contraction | biological_process | chaperone-mediated protein transport                                   | 3 | 7.36E-04 |
| GO:0043204 | Contraction | cellular_component | perikaryon                                                             | 3 | 7.36E-04 |
| GO:0030195 | Contraction | biological_process | negative regulation of blood coagulation                               | 3 | 7.36E-04 |
| GO:0001164 | Contraction | molecular_function | RNA polymerase I CORE element sequence-specific DNA binding            | 3 | 7.36E-04 |
| GO:0070508 | Contraction | biological_process | cholesterol import                                                     | 3 | 7.36E-04 |
| GO:0060535 | Contraction | biological_process | trachea cartilage morphogenesis                                        | 3 | 7.36E-04 |
| GO:0042823 | Contraction | biological_process | pyridoxal phosphate biosynthetic process                               | 3 | 7.36E-04 |
| GO:0045725 | Contraction | biological_process | positive regulation of glycogen biosynthetic process                   | 3 | 7.36E-04 |
| GO:0008154 | Contraction | biological_process | actin polymerization or depolymerization                               | 3 | 7.36E-04 |
| GO:0021722 | Contraction | biological_process | superior olivary nucleus maturation                                    | 3 | 7.36E-04 |
| GO:0071731 | Contraction | biological_process | response to nitric oxide                                               | 3 | 7.36E-04 |
| GO:0010765 | Contraction | biological_process | positive regulation of sodium ion transport                            | 3 | 7.36E-04 |
| GO:0070863 | Contraction | biological_process | positive regulation of protein exit from endoplasmic reticulum         | 3 | 7.36E-04 |
| GO:0005355 | Contraction | molecular_function | glucose transmembrane transporter activity                             | 3 | 7.36E-04 |
| GO:0050772 | Contraction | biological_process | positive regulation of axonogenesis                                    | 3 | 7.36E-04 |

|            |             |                    |                                                                                                                  |   |          |
|------------|-------------|--------------------|------------------------------------------------------------------------------------------------------------------|---|----------|
| GO:0033209 | Contraction | biological_process | tumor necrosis factor-mediated signaling pathway                                                                 | 3 | 1.36E-03 |
| GO:0015887 | Contraction | biological_process | pantothenate transmembrane transport                                                                             | 3 | 6.10E-03 |
| GO:0042136 | Contraction | biological_process | neurotransmitter biosynthetic process                                                                            | 3 | 6.10E-03 |
| GO:0008284 | Contraction | biological_process | positive regulation of cell proliferation                                                                        | 3 | 7.07E-03 |
| GO:0006368 | Contraction | biological_process | transcription elongation from RNA polymerase II promoter                                                         | 3 | 8.11E-03 |
| GO:1901998 | Contraction | biological_process | toxin transport                                                                                                  | 3 | 9.29E-03 |
| GO:0006915 | Contraction | biological_process | apoptotic process                                                                                                | 3 | 1.48E-02 |
| GO:1990440 | Contraction | biological_process | positive regulation of transcription from RNA polymerase II promoter in response to endoplasmic reticulum stress | 3 | 1.77E-02 |
| GO:0032496 | Contraction | biological_process | response to lipopolysaccharide                                                                                   | 3 | 1.79E-02 |
| GO:0010468 | Contraction | biological_process | regulation of gene expression                                                                                    | 3 | 2.04E-02 |
| GO:0005576 | Contraction | cellular_component | extracellular region                                                                                             | 2 | 1.63E-08 |
| GO:0007399 | Contraction | biological_process | nervous system development                                                                                       | 2 | 4.22E-06 |
| GO:0048511 | Contraction | biological_process | rhythmic process                                                                                                 | 2 | 2.14E-03 |
| GO:0010092 | Contraction | biological_process | specification of organ identity                                                                                  | 2 | 8.17E-03 |
| GO:1903818 | Contraction | biological_process | positive regulation of voltage-gated potassium channel activity                                                  | 2 | 8.17E-03 |
| GO:0015826 | Contraction | biological_process | threonine transport                                                                                              | 2 | 8.17E-03 |
| GO:0097191 | Contraction | biological_process | extrinsic apoptotic signaling pathway                                                                            | 2 | 8.17E-03 |
| GO:0006505 | Contraction | biological_process | GPI anchor metabolic process                                                                                     | 2 | 8.17E-03 |
| GO:0072560 | Contraction | biological_process | type B pancreatic cell maturation                                                                                | 2 | 8.17E-03 |
| GO:0016322 | Contraction | biological_process | neuron remodeling                                                                                                | 2 | 8.17E-03 |
| GO:0060976 | Contraction | biological_process | coronary vasculature development                                                                                 | 2 | 8.17E-03 |
| GO:0035249 | Contraction | biological_process | synaptic transmission, glutamatergic                                                                             | 2 | 1.41E-02 |

**Supplementary Table 26. Thermal niche overlap between banded penguin species.**

| <b>Species Pair</b>  | <b>niche expansion<br/>Exclusive niche<br/>sp2<br/>(not shared with<br/>2)</b> | <b>niche stability<br/>(shared Niche<br/>Of 1 with 2)</b> | <b>Niche unfilling<br/>(unoccupied niche<br/>of sp1 by sp2)</b> | <b>Salinity D overlap</b> |
|----------------------|--------------------------------------------------------------------------------|-----------------------------------------------------------|-----------------------------------------------------------------|---------------------------|
| Galápagos-Magellanic | 0.988                                                                          | 0.012                                                     | 0.002                                                           | 0.041                     |
| Galápagos-Humboldt   | 0.996                                                                          | 0.004                                                     | 0.861                                                           | 0.014                     |
| Magellanic-Humboldt  | 0.001                                                                          | 0.999                                                     | 0.374                                                           | 0.555                     |
| Humboldt-African     | 0.005                                                                          | 0.995                                                     | 0.028                                                           | 0.568                     |
| Magellanic-African   | 0                                                                              | 1                                                         | 0.012                                                           | 0.374                     |
| Galápagos-African    | 0.993                                                                          | 0.007                                                     | 0.717                                                           | 0.014                     |

**Supplementary Table 27. Chlorophyll niche overlap between banded penguin species.**

| <b>Species Pair</b>  | <b>niche<br/>expansion<br/>Exclusive<br/>niche sp2<br/>(not shared<br/>with 2)</b> | <b>niche stability<br/>(shared Niche<br/>Of 1 with 2)</b> | <b>Niche unfilling<br/>(unoccupied niche of<br/>sp1 by sp2)</b> | <b>Salinity D overlap</b> |
|----------------------|------------------------------------------------------------------------------------|-----------------------------------------------------------|-----------------------------------------------------------------|---------------------------|
| Galápagos-Magellanic | 0.151                                                                              | 0.849                                                     | 0.000                                                           | 0.444                     |
| Galápagos-Humboldt   | 0.610                                                                              | 0.390                                                     | 0.216                                                           | 0.256                     |
| Magellanic-Humboldt  | 0                                                                                  | 1                                                         | 0.195                                                           | 0.742                     |



|                    |       |       |       |       |
|--------------------|-------|-------|-------|-------|
| Humboldt-African   | 0     | 1     | 0.005 | 0.633 |
| Magellanic-African | 0     | 1     | 0.107 | 0.698 |
| Galápagos-African  | 0.146 | 0.854 | 0.022 | 0.382 |

**Supplementary Table 28. Salinity niche overlap between banded penguin species.**

| Species Pair         | niche expansion<br>Exclusive niche sp2<br>(not shared with 2) | niche stability<br>(shared Niche<br>Of 1 with 2) | Niche unfilling<br>(unoccupied niche<br>of sp1 by sp2) | Salinity D overlap |
|----------------------|---------------------------------------------------------------|--------------------------------------------------|--------------------------------------------------------|--------------------|
| Galápagos-Magellanic | 0                                                             | 1                                                | 0                                                      | 0.016              |
| Galápagos-Humboldt   | 0.715                                                         | 0.285                                            | 0                                                      | 0.037              |
| Magellanic-Humboldt  | 0                                                             | 1                                                | 0.118                                                  | 0.500              |
| Humboldt-African     | 0.33                                                          | 0.67                                             | 0.489                                                  | 0.060              |
| Magellanic-African   | 0                                                             | 1                                                | 0.202                                                  | 0.059              |
| Galápagos-African    | 0.965                                                         | 0.035                                            | 0.289                                                  | 0.312              |

**Supplementary Table 29. Overall niche overlap between banded penguin species.**

| Species    | Galápagos | Magellanic | Humboldt | African  |
|------------|-----------|------------|----------|----------|
| Galápagos  |           | 0.007037   | 0.100545 | 0.04792  |
| Magellanic |           |            | 0.530628 | 0.183882 |
| Humboldt   |           |            |          | 0.324413 |
| African    |           |            |          |          |

**Supplementary Table 30. Overall and univariate niche overlap between genetic populations of banded penguin species.**

|                                             | <b>Niche Overlap</b> | <b>Temp D</b> | <b>Salinity D</b> | <b>Chlorophyll</b> |
|---------------------------------------------|----------------------|---------------|-------------------|--------------------|
| <i>S. mendilicus</i> (Isabella-Santiago)    | 0.05610183           | 0.11819       | 0.39965           | 0.06557            |
| <i>S. humboldti</i> (North - South)         | 0.0909311            | 0.00691       | 0.03415           | 0.65676            |
| <i>S. magellanicus</i> (Pacific - Atlantic) | 0.3954385            | 0.4926        | 0.41261           | 0.69899            |

**Supplementary Table 31. Dynamic niche evolution between genetic populations of banded penguin species. Niche expansion / stability / unfilling is given as comparison of pair 2 to pair 1.**

| <b>Galápagos penguin</b>    | <b>Expansion</b> | <b>Stability</b> | <b>Unfilling</b> |
|-----------------------------|------------------|------------------|------------------|
| Temperature                 | 0.02435257       | 0.97564743       | 0.69061723       |
| Salinity                    | 0.002850638      | 0.997149362      | 0.388978330      |
| Chlorophyll                 | 0.000000         | 1.000000         | 0.523524         |
| <b>Humboldt Penguin</b>     | <b>Expansion</b> | <b>Stability</b> | <b>Unfilling</b> |
| Temperature                 | 0.995253235      | 0.004746765      | 0.994453671      |
| Salinity                    | 0.7653543        | 0.2346457        | 0.7746007        |
| Chlorophyll                 | 0.00000000       | 1.00000000       | 0.04767163       |
| <b>Magellanicus Penguin</b> | <b>Expansion</b> | <b>Stability</b> | <b>Unfilling</b> |
| Temperature                 | 0.323249127      | 0.676750873      | 0.006495807      |

|             |            |            |            |
|-------------|------------|------------|------------|
| Salinity    | 0.69485188 | 0.30514812 | 0.06332115 |
| Chlorophyll | 0.34090898 | 0.65909102 | 0.02369917 |

**Supplementary Table 32. Significant bioclimatic variables for RDA methods.**

| Variable                                | Acronym |
|-----------------------------------------|---------|
| Average speed of present ocean currents | VELO    |
| Annual Mean Temperature                 | BIO1    |
| Chlorophyll                             | CHLO    |
| Annual Mean Precipitation               | BIO12   |
| Mean Diurnal Range                      | BIO2    |

**Supplementary Table 33.** Redundancy Analysis (RDA) statistic significant for autosomal Single Nucleotide Polymorphisms (SNPs) of banded penguin Species. The R-squared values explained variance and the adjusted R-squared values account for predictor influence. Both sets exhibit significant F-statistics underscoring the importance of genetic variations in influencing the observed outcomes.

| Species     | $R^2$ | $R^2$ Adjusted | Eigenvalues (RDA1) | Eigenvalues (RDA2) | Proportion explain (RDA1) | Proportion explain (RDA2) | Pr(>F) |
|-------------|-------|----------------|--------------------|--------------------|---------------------------|---------------------------|--------|
| All Species | 0.166 | 0.135          | 568.5569           | 175.7189           | 0.6832                    | 0.2111                    | 0.001  |
| Gal         | 0.107 | 0.008          | 231.1567           | 207.246            | 0.5273                    | 0.4727                    | 0.006  |
| Hum         | 0.128 | 0.003          | 156.2886           | 144.2786           | 0.2731                    | 0.2521                    | 0.096  |
| Mag         | 0.121 | 0.004          | 155.6432           | 141.6952           | 0.2756                    | 0.2509                    | 0.017  |
| Afr         | 0.201 | 0.001          | 273.4021           | 219.2992           | 0.3072                    | 0.2464                    | 0.092  |
